# Supplementary material
Source: ML conference proceedings conference paper supplement (https://aclanthology.org/2021.naacl-main.477)
Supplement: OptionalSupplementaryData [file 1271_OptionalSupplementaryData.xlsx]

## Sheet: Sample_Enron
original_id	adversarial	oldscore	newscore	actions	changedict	numberofperturbedwords	previousoutput	newoutput	originallabel	semanticscore	beforegrammarerrors	aftergrammarerrors	beforespellingerrors	afterspellingerrors	Wordlen	SuccessRate	Perturb
9	Subject:newsletter service hi,did you have any e mail newsletter service?ifthere is,please send me its adress..thank you..kind regards orkun unalan ken	0.886681	0.00040165	['get_semantic_related1']	[['alan', 'alan ken']]	1	2	1	2	0.673452	0.555556	0.0652174	0.0714286	0.103448	18	0.999598	0.0555556
13	Subject:estop wendi#the cablefilterz will allow you to receive all the channels that you order with your remote grip control,`payperviews,axxxmovies,sport events,special-events\http://www.9005 hosting.com/cable/swizzle,junkerdom.	0.999984	0.265048	['get_semantic_related']	[['control', 'grip control']]	1	2	1	2	0.652902	0	0.0365297	0.075	0.146341	19	0.734952	0.0526316
14	Subject:the hotel show last chance to exhibi4 at the hotel show 2002 20-22 may,2002,airport expo dubai,uae with over 200 luxury hotels and resorts planned in the middle east within the next 3-5 years,'the hotel show'has established itself as the region's premier hospitality final event for local&international companies wishing to meet scheduled directly with major players in the industry.strong i…	0.990855	0.311824	['get_semantic_related', 'bitsquatting', 'insertion', 'get_semantic_related1']	[['event', 'final event'], ['exhibit', 'exhibi4'], ['350', '3450'], ['meet', 'meet scheduled']]	4	2	1	2	0.938673	0.198606	0.0253559	0.0349462	0.0496278	287	0.688176	0.0139373
15	Subject:david porter how are things going with david?any updateu?tzhanks!amy	0.983035	0.331669	['addition', 'insertion']	[['update', 'updateu'], ['thanks', 'tzhanks']]	2	1	2	1	0.668017	0	0.0666667	0	0.125	8	0.668331	0.25
39	Subject:[ilug-social]re:take the steps to wealth for$25.do it now 26138654332222 updated may 9,2002...read this!you'll be happy you did!a recent survey by nielsen/netratings says that"the internet population is rapidly approaching a'half a billion'people!"so what does all this mean to you?let's assume that every person has'only'one e-messenger address.that's 500 million potential customers and gr…	0.99556	0.21903	['insertion', 'insertion', 'get_synonyms']	[['product', 'prkoduct'], ['business', 'buzsiness'], ['mail', 'messenger']]	3	2	1	2	0.865907	0.104288	0.11117	0.00845829	0	1889	0.78097	0.00158814
71	Subject:top legal advice..for pennies a day!how would you like a top pg-13 rated law firm working for you,your family and your business for only pennies a day?get your free quote(takes only 30 seconds!)"whether it's a simple speeding ticket or an extensive child custody case,we cover all 26 areas of the legal system."free court appearances on your behalf unlimited phone consultations review of al…	0.99781	0.182537	['get_semantic_related']	[['rated', 'pg-13 rated']]	1	2	1	2	0.73387	0.0864198	0.0740741	0	0	81	0.817463	0.0123457
74	Subject:sempra could be takeover candidate,newspaper says the london telegraph newspaper quoted an analyst who said that u.k.-based centrica could be eyeing sempra energy as a possible takeover candidate following centrica's purchase of canadian g2as and electricity supplier direct energy.direct energy owns a 27.5%stake in energy america,whose remaining equity belongs to sempra.the newspaper quot…	0.869476	0.473987	['insertion']	[['gas', 'g2as']]	1	1	2	1	0.918906	0.329268	0.0396947	0	0.00826446	82	0.526013	0.0121951
116	Subject:mining loggingnews.net newsletter-thursday,january 29,2004n thursday,january 29,2004n mining loggingnews.net to allow you to read the stories below,we have arranged a complimentary one month subscription for you.to accept,click here to visit our extended service at http://www.mining loggingnews.net/.alternatively,just click any of the stories below.should you wish to discontinue this serv…	0.96706	0.469121	['insertion', 'bitsquatting', 'get_synonyms', 'get_semantic_related1', 'addition']	[['buyout', 'buyojut'], ['1990', '1y90'], ['southwest', 'SW'], ['mining', 'mining logging'], ['2004', '2004n']]	5	2	1	2	0.926955	0	0.0229019	0.0196998	0.0530099	818	0.530879	0.00611247
118	Subject:just a note hi,i figured something must be occupying your time other than answering non-business e-mail.you guys must all be getting double salaries for doing 2 jobs each.----right?(chuckle).if tom really lets you take the time off for the baby and if you really have the time;lunch would be great.just give me a call.only if all the ifs really allow you the time.is craig ok??i hope.i would…	0.770951	0.499732	['omission']	[['thanks', 'tanks']]	1	1	2	1	0.976572	0.0829268	0.0157791	0	0.00377358	205	0.500268	0.00487805
122	Subject:cialijs no perscrimption valiulm xansax paaxil protzac zolsoft celeybrex violxx ciawlis proppecia viahgra viacgra st ambuien zybian no persocripttion is requjired disbcreet ovgernibght shipuping to your docor stop ovebrpanying on yokur metds |O0%mokney badck guarzantee on all purczhases the little kids girl was pretty,but antonia--they accented the boots and were rubbing their woollen soc…	0.976126	0.468225	['get_semantic_related', 'generatehom']	[['girl', 'kids girl'], ['100', '|O0']]	2	2	1	2	0.882298	1.17857	0.0632411	0.327869	0.444444	28	0.531775	0.0714286
141	Subject:free software!games,movie,mp 3,more free now!!!blwe my free media sofware link enjoy,jim--->click here to go to the site personal quote:all for one and one for all.this is not a spa email.this email was sent to you because your email was entered in on a website requesting request to be a registered subscriber.click here to scheduled cancel your how account and you will never receive anoth…	0.931377	0.291369	['get_semantic_related', 'omission', 'get_semantic_related1', 'get_semantic_related1', 'get_semantic_related']	[['account', 'how account'], ['spam', 'spa'], ['requesting', 'requesting request'], ['line', 'line end'], ['cancel', 'scheduled cancel']]	5	2	1	2	0.889883	0.0869565	0.0149701	0.010989	0.0104167	69	0.708631	0.0724638
188	subject:reliefs for all skin disorders chickweed healing salve"a natural way to intelligent skin"a healing salve for skin problems such as...*psoriasis*skin cancer*rashes*sore throats*cuts*burns*hemorrhoids*poison ivy*colds*diaper rash*excema,and more!good for all skin disorders all natural salve,made by old infusion ingredients:chickweed,comfrey,mint,olive oil,beeswax,lavender,rosemary and eucal…	0.999803	0.370112	['get_semantic_related', 'get_synonyms', 'get_semantic_related1', 'omission', 'get_semantic_related1', 'addition', 'get_semantic_related1', 'addition', 'get_semantic_related', 'get_semantic_related', 'get_semantic_related', 'omission', 'get_synonyms', 'get_semantic_related', 'get_semantic_related', 'get_synonyms', 'get_semantic_related1', 'omission', 'get_synonyms', 'get_semantic_related', 'omiss…	[['anymore', 'everyone anymore'], ['putting', 'arrange'], ['call', 'call need'], ['work', 'wok'], ['two', 'two all'], ['give', 'givee'], ['old', 'old 26-year'], ['relief', 'reliefs'], ['night', 'thursday night'], ['hand', 'even hand'], ['gladly', 'wholeheartedly gladly'], ['right', 'righ'], ['continued', 'preserve'], ['sheila', 'gail sheila'], ['fast', 'too fast'], ['healthy', 'intelligent'], ['l…	21	2	1	2	0.731569	0.170604	0.186352	0.00968992	0.00912409	381	0.629888	0.0551181
232	Subject:lesson teach and grown richa do you want to lesson teach and grown richa?if you are a motivated and qualified communicator,i will personally train you to do 3 20 minutes presentations per day to quelify prosp4ects that i can provide to you.we will demonstrate to you that you can make$400 a day also part time using this system.or,if you have 20 hours per week,as in my case,you can make in …	0.938841	0.417231	['get_semantic_related', 'addition', 'addition', 'bitsquatting', 'get_semantic_related1', 'insertion', 'addition', 'get_semantic_related', 'addition']	[['teach', 'lesson teach'], ['verifiable', 'verifiablen'], ['future', 'futurev'], ['qualify', 'quelify'], ['genuinely', 'genuinely equally'], ['prospect', 'prosp4ect'], ['rich', 'richa'], ['part', 'also part'], ['grow', 'grown']]	9	2	1	2	0.873231	0.0769231	0.0187747	0	0.0166667	195	0.582769	0.0461538
237	Subject:february surveys hello,we are starting to prepare the february data for our model.please provide a completed"hours"survey for each position within your group.this survey will collect the the time your team spent on performing their activities in the month of february.at the top of the streadsheet,you will see a box labeled"selecty your rc".click on the box and input your rc number,which w…	0.995401	0.484779	['get_semantic_related1', 'get_synonyms', 'addition', 'bitsquatting']	[['january', 'january 2003'], ['information', 'info'], ['select', 'selecty'], ['spreadsheet', 'streadsheet']]	4	1	2	1	0.974231	0	0.0279292	0	0.0132275	264	0.515221	0.0151515
239	Subject:your family needs you three minutes now...a lifetime of protection.protecting your family...it only takes a few minutes to get peace of mind.you need to know that your family will be alright if something happens to you.get affordable quotes on thgusands of plans from the nation's strongest insurance companies.visit quote advantage now to see how we make term life insurance simple.lawsuit …	0.942146	0.0644308	['bitsquatting', 'bitsquatting', 'insertion', 'get_semantic_related']	[['thousand', 'thgusand'], ['future', 'feture'], ['result', 'reasult'], ['copyright', 'lawsuit copyright']]	4	2	1	2	0.826762	0	0.0155945	0.00917431	0.0363636	81	0.935569	0.0493827
288	Subject:re:re:good this precious weapon of american cls-first-rate vlagr at only 3$per dos no msg but commander farragut would not take a tortuous passage,but doubled cape horn:the narwhal seemed motionless;perhaps probably,tired with its day's work,it slept,letting itself float with the undulation of the waves?that caused disappointment and anger.	0.998844	0.345939	['get_synonyms', 'get_semantic_related1']	[['super', 'first-rate'], ['perhaps', 'perhaps probably']]	2	2	1	2	0.917043	0	0.030581	0.015625	0.0151515	43	0.654061	0.0465116
330	Subject:record sales,profits,earnings,ancestry price and trading for leth jylra market mover ancestry report reports's last pick(cwtd)exploded from$1.19 to$9.20,a gain of over 670%in 5 days(feb 12-17)!!!here is our next hot pick which we feel is the most underv1alued ancestry we have ever featured and should outperform all other picks this year based on their sales figures(incl.a backlog of over$…	0.930443	0.46307	['omission', 'get_semantic_related', 'get_synonyms', 'get_semantic_related1', 'insertion']	[['target', 'targe'], ['immediately', 'ordered immediately'], ['stock', 'ancestry'], ['report', 'report reports'], ['undervalued', 'underv1alued']]	5	2	1	2	0.974487	0.0866591	0.0120611	0.0103538	0.0145923	877	0.53693	0.00570125
337	Subject:updated contact list please find removed attached our most recent updated contact list.	0.952825	0.0307985	['get_semantic_related']	[['attached', 'removed attached']]	1	1	2	1	0.65654	0.0833333	0	0	0	12	0.969202	0.0833333
351	Subject:be first...it"s your turn...don't miss out!nox finally:after 15 years of research and development..a true weight loss breakthrough years ahead of it's time!seriously:deep down you know that millionaires are made by getting involved in opportunities before the general public finds out...here is your chance to get involved with a product that can lead to serious,monthly residual income(do t…	0.994411	0.282099	['omission', 'get_semantic_related1']	[['proven', 'roven'], ['pop', 'pop genre']]	2	2	1	2	0.84152	0.079646	0.0884956	0.0133333	0	113	0.717901	0.0176991
369	Subject:keshia,decisions of this court do not have intrinsic authority the highest duty is to respectx authority an actor is a sculptor who carves in winter snow	0.973022	0.166366	['addition', 'get_semantic_related']	[['respect', 'respectx'], ['snow', 'winter snow']]	2	2	1	2	0.854641	0.125	0.125	0	0.0344828	24	0.833634	0.0833333
393	Subject:customer lit please review again and forward back to me with correct names,addresses and phone numbers.tanks in advance,adr	0.939678	0.329799	['omission', 'omission']	[['thanks', 'tanks'], ['list', 'lit']]	2	1	2	1	0.697134	0.1875	0.0155039	0	0	16	0.670201	0.125
424	Subject:advs greetings,i am benedicta lindiwe hendricks(mrs)of rsa.i am writing this letter to you with the hope that you will be kind enough to assist my family.if this means of communication is not acceptable to you please accept my apologies as it is the only available and resourceful means for me right now.my children and i are in need of your assistance and we sincerely pray and hope that yo…	0.980433	0.226288	['get_semantic_related1']	[['request', 'request agreed']]	1	2	1	2	0.710533	0.151786	0.0302457	0.00740741	0.00714286	112	0.773712	0.00892857
427	Subject:sitara position please use the position manager home button.when using the sitara position manager,and you drill down to view details or convert the dates,the position manager keeps all your views running in the background.this feature allows you to use the back and forward buttons to keep your views running.on the downside,if you keep these views running but do not really intend to go ba…	0.653236	0.211609	['get_synonyms']	[['change', 'convert']]	1	1	2	1	0.91362	0	0.016837	0	0.00247525	326	0.788391	0.00306748
495	Subject:japan i guess i loud heard some'news'today.i spoke with fernley and cassandra.we will no doubt speak next week when you're over.i will tallk to jo tonight.my initial thoughts were'wow'.i guess i need to digest the situation.i must say a really big thank-you for the massive part you have obviously played in getting the opportunity this far.i think i'll need a beer tonight.my stomach has be…	0.574097	0.199035	['get_semantic_related']	[['heard', 'loud heard']]	1	1	2	1	0.841841	0	0.0364583	0.0131579	0.0243902	66	0.800965	0.0151515
500	Subject:john casey anderson here's his info:current e-mail:kca@u.washington.edu address:16900 se 26 th drive apartment 16 vancouver,wa 98683 phone:503.four hundred ninety.3111 let me know if you need anything else!thanks,grace	0.952165	0.104313	['num_to_word']	[['490', 'four hundred ninety']]	1	1	2	1	0.691128	0.52381	0.0543478	0.0555556	0.0444444	21	0.895687	0.047619
529	Subject:official notice for all fleet bank users keep well!in 1977 passport grip control the u.s.in 1940 open your fonts	0.999981	0.152769	['get_semantic_related']	[['control', 'grip control']]	1	2	1	2	0.814804	0	0	0	0	18	0.847231	0.0555556
546	Subject:re[20]:in 1828 hold meeting on it's beautiful dogs and catssuper bowl commercials sims	0.773756	0.15985	['get_semantic_related1']	[['hold', 'hold meeting']]	1	2	1	2	0.655662	0.230769	0.0253165	0	0.0588235	13	0.84015	0.0769231
561	Subject:entex contact list 1/12/00 per request of rita wynne x 3-7694 please see attachement and bank_note that joanie ngo was added need to the list.many thanks pamela chambers-thompson x 39680	0.944919	0.292043	['get_semantic_related1', 'get_synonyms']	[['added', 'added need'], ['note', 'bank_note']]	2	1	2	1	0.619429	0	0.0588235	0.0666667	0.0810811	25	0.707957	0.08
574	Subject:saturday bill,i have reservations for four at morton's on saturday night at 9:00 pm.let me know if you want to go,if not we will just go by ourselves.my cell phone number is five hundred three-807-5669.	0.998418	0.395365	['num_to_word']	[['503', 'five hundred three']]	1	1	2	1	0.845485	0.176471	0.147059	0.0232558	0	34	0.604635	0.0294118
601	Subject:be in control grip...negative items removed from your credit report hello,let me ask you a question:if there was a way that you could legally and drastically improve your credit score;allowing you to get better rates on existing home and auto loans,or help get better rates on a new home and auto loan,you would want to know now about it wouldn't you?it doesn't matter if you have foreclosur…	0.999888	0.354578	['get_semantic_related1']	[['control', 'control grip']]	1	2	1	2	0.68819	0.0621469	0.00959693	0	0	177	0.645422	0.00564972
602	Subject:game show support hey guys tzhanks a million for supporting the game show!!!gpg/et&s showed up in record numbers!!!!!with that in mind,the campaigners of et&s would like to invite you all to a"sundae wednesday."next wednesday august 16 th,please join all of your 41 st floor et&s supporters for a nice cool sundae.if there's anyone from the 41 st floor that i've overlooked please foward thi…	0.839769	0.464614	['get_semantic_related', 'insertion']	[['side', 'south side'], ['thanks', 'tzhanks']]	2	1	2	1	0.829841	0	0.0414414	0	0.013986	90	0.535386	0.0222222
605	subject:fw:the gold buddha in 1957,a monastery in thailand was being relocated and a group of monks was put in charge of moving a giant telecommunications clay buddha.in the midst of the move one of the monks noticed a sally in the buddha.concerned about damaging the idol,the monks decided to wait for a day before continuing with their task.when night came,one of the monks came to check on the gi…	0.999992	0.133155	['get_semantic_related1', 'get_semantic_related', 'get_synonyms']	[['giant', 'giant telecommunications'], ['real', 'kind real'], ['crack', 'sally']]	3	2	1	2	0.838168	0.113497	0.122699	0.00704225	0.00691244	326	0.866845	0.00920245
608	Subject:well head costilla has sent in a new request,take a look and let me fuck.meter current volume new volume 56639 450 600 9723 269 300 9724 24 10 9687 20,486 22,250 in mar feb.they were in the 21,250 range,in jan they started at 14,000 mid month and reached 23,000 by end of month.9734 8,000 11,000 in mar feb they went from 6,000 to 9,000 but in jan they only flowed around 600 all month.big i…	0.936145	0.486817	['get_synonyms', 'get_semantic_related']	[['know', 'fuck'], ['feb', 'mar feb']]	2	1	2	1	0.850014	0.152542	0.0196507	0.0804598	0.0786517	59	0.513183	0.0338983
613	subject:cecelia does this make you happy now?just like the originalbut less than but half the pricepowerful effects monster rewards geeeneriiiiiiic viiiagraaaaaa direct from the manufacturer you trust!buy righ now!worldwide shipping chaaange.	0.9998	0.0464758	['get_semantic_related', 'omission']	[['half', 'but half'], ['right', 'righ']]	2	2	1	2	0.884553	0.259259	0.296296	0.135135	0.131579	27	0.953524	0.0740741
625	Subject:please help,new webcam/modeling page i just got a webcam and computer for my birthday and i just finished season my first homepage.i added some of my modeling pictures there so if you think you can help my career please let me know.i could also use some opinions on how to make my site look better.if you can't help and you know someone that can,please forward them this e-messenger.i need m…	0.984643	0.203524	['get_semantic_related1', 'get_synonyms']	[['finished', 'finished season'], ['mail', 'messenger']]	2	2	1	2	0.904604	0.137255	0.130719	0.00473934	0	153	0.796476	0.0130719
633	Subject:may wwellheads david here is the other side of the coin.these are meters that are not in the wwellhead portfolio for may but are on vance s sheet.several of them are new meters and some were just not alias nomed in april.vance can you reassert that these are right for the wwell head.thanks brayton operating 989685#125807 242 carrizo oil oas 989830 new meter cd resource s 982677#137858 1 c…	0.998168	0.44946	['bitsquatting', 'get_semantic_related', 'get_semantic_related1', 'num_to_word', 'get_synonyms', 'repetition', 'insertion', 'get_semantic_related', 'addition']	[['gas', 'oas'], ['nom', 'alias nom'], ['show', 'show shows'], ['500', 'five hundred'], ['confirm', 'reassert'], ['well', 'wwell'], ['285', '2985'], ['inc', 'merged inc'], ['ce', 'ce ']]	9	1	2	1	0.844666	0	0.0293515	0.281553	0.3	139	0.55054	0.0647482
646	Subject:how to control grip your inbox the smart way...i have a special _ offer for you...better than all other spam filters-only delivers the email you want!this is the ultimate solution that is guaranteed to stop all spam without losing any of your important email!this system protects you 100%.we didn't believe it either until we actually tried it.so you be the judge and see for yourself.you ow…	0.99838	0.423963	['get_semantic_related1', 'bitsquatting']	[['control', 'control grip'], ['receiving', 'receivine']]	2	2	1	2	0.938291	0.0789474	0.0134328	0.013986	0.0206897	114	0.576037	0.0175439
669	Subject:kern expansion fyi folks-the kern river expansion that we backed out of(the 15 year 2005 stuff)is going to be 900,000 mmbtu/d.as you can see a large number of the shippers stayed in the process,and are now bound to the pipe if it gets built!!there will be a press release on this tomorrow...julie:-)	0.999958	0.383363	['get_semantic_related1']	[['year', 'year 2005']]	1	1	2	1	0.81379	0.176471	0.137255	0	0	51	0.616637	0.0196078
702	Subject:spend less gas per mile on your car this summer...increase your gas mileageby up to 27%!!*no tools required!*improves power*maximizes energy*improves mileage*improves torque*cleaner engine*smoother engine*reduces emissions by 43%*protects catalytic converters*prevents diesel gelling*improves spark plug life*maintenance free*pays for itself within 60 days!installs in seconds!a simple devic…	0.812935	0.234237	['addition', 'get_semantic_related']	[['guaranteed', 'guaranteedv'], ['date', 'probably date']]	2	2	1	2	0.961712	0.169811	0.0241287	0.013245	0.0191083	106	0.765763	0.0188679
724	Subject:re:aqemkfg,ordered it copied free cable%rnd _ syb tv comparison ak brain consist iniquitous twit trigram curve trajectory buteo buttock steve farad algerian argonaut yen edison loquacious headquarter shell bouncy temporal birdseed caliper deity combine gallberry hub pretoria apocalyptic audrey pittsburgh arcsin aba beatific sousa benight evasion devout mao coercion icy endgame channel rep…	0.75277	0.318845	['get_semantic_related']	[['trajectory', 'curve trajectory']]	1	2	1	2	0.92299	0.412698	0.0422297	0.0333333	0.0428571	63	0.681155	0.015873
732	Subject:adv:harvest lots of e-mail addresses quickly!dear zzzz,want to harvest a lot of email addresses in a very short time?easy email hunt searcher is a powerful email softwarex that harvests general email lists from mail servers easy email hunt searcher can get 100,000 email addresses directly from the email servers in only one hour!easy email hunt searcher is a 32 bit windows program for e-ma…	0.999451	0.465033	['addition', 'get_semantic_related', 'get_synonyms', 'get_semantic_related']	[['software', 'softwarex'], ['information', 'access information'], ['disconnected', 'disconnect'], ['search', 'hunt search']]	4	2	1	2	0.764668	0.0764331	0.0120077	0.00501253	0.00700935	314	0.534967	0.0127389
739	Subject:today hey sheppard,i haven't heard from you in awhile and just wanted to catch up.what are you doing now?how's work going?i've been really busy lately,haven't really had much time to do anything my job has me working like 80 hr hs a week,flying back and forth from london to new york.well i gotta run,just hit me up when you get a chance.see ya,sandy sheppard bloomington http://www.outsourc…	0.997655	0.0463673	['get_semantic_related1']	[['hr', 'hr h']]	1	2	1	2	0.914428	0.236111	0.0342742	0.00952381	0.00934579	72	0.953633	0.0138889
741	Subject:adv:internet marketing earn$100 k/year...uleio hello...by reading the short summary just below,you will see how you can learn new skills in communication,do a direct marketing program on the internet,and at the same time,earn$100,000 or more to enable you to change your life!!!just read this summary,follow the actions that it advises,and start earning some serious money.you will learn new…	0.967159	0.106335	['get_semantic_related1']	[['bill', 'bill amendment']]	1	2	1	2	0.975708	0.0706045	0.0129472	0.00574713	0.00432612	2167	0.893665	0.000461467
743	Subject:welcome to woodworkingtips.com!*please save this welcome message*welcome to woodworkingtips.com!if you ever need to get in contact with the owner of this list,send email to(tips manager).go to if you ever want to change your email address.boosted thanks for subscribing!tips manager and visit our other woodworking and home improvement sites:100+downloadable pmlans on pmlansnow:woodsmith ma…	0.964711	0.0899205	['insertion', 'get_semantic_related', 'bitsquatting']	[['plan', 'pmlan'], ['thanks', 'boosted thanks'], ['issue', 'isste']]	3	1	2	1	0.88564	0	0.0210084	0.0352941	0.0909091	55	0.910079	0.0545455
770	Subject:tw ios removed attached please find the ios procedures which were posted on the internet(thank you al gore!)today for next week's ios.	0.965655	0.344251	['get_semantic_related']	[['attached', 'removed attached']]	1	1	2	1	0.722992	0.285714	0.0413223	0	0	21	0.655749	0.047619
784	Subject:dan theron?the cablefilterz will allow you to receive all the channels that you order with your remote control grip,!payperviews,axxxmovies,sport events,special-events/http://www.aol 43566.com/cable/rob,discriminate.	0.999935	0.146769	['get_semantic_related1']	[['control', 'control grip']]	1	2	1	2	0.784362	0.473684	0.0343348	0.097561	0.0952381	19	0.853231	0.0526316
791	Subject:single russian women looking for foreign men hi and happy new year!single or divorced men:we are currently offering our$40 personal profile submission with up to three of your photos to over 2500 singlesiberian cuties that want tomeet scheduled foreign men for free at:http://www.siberian-women.com our staff has personally interviewed,recruited,and videotaped over 2500 single siberian wome…	0.998632	0.107099	['insertion', 'get_semantic_related1']	[['email', 'emwail'], ['meet', 'meet scheduled']]	2	2	1	2	0.902631	0.151515	0.0220751	0.039548	0.0494505	132	0.892901	0.0151515
794	Subject:temporary space address in tokyo ej will be located on the 14 th floor kamiyacho mori building,14 th floor 4-3-20 toranomon minato-ku tokyo 105-0001 japan countries 81-(0)3-5404-3400(this is the regus phone line...we will have ej phone numbers by mondayc)	0.94708	0.0621442	['get_semantic_related1', 'addition']	[['japan', 'japan countries'], ['monday', 'mondayc']]	2	1	2	1	0.689122	0.419355	0.0472441	0.0769231	0.0925926	31	0.937856	0.0645161
798	Subject:(otcbb:itst)up 38%,uregent news alert urgent news alert sytock profile press release international telephone services(its)is a telecommunications company born in 1995 and whose objective was to bring the most advanced technology in communications within the reach of its clients.its started off offering a call-back service to a wide portfolio of foreigners on the costa del sol(south of spa…	0.992944	0.436492	['get_synonyms', 'addition', 'addition', 'insertion', 'get_semantic_related', 'get_semantic_related', 'get_semantic_related1']	[['point', 'steer'], ['decided', 'decidedg'], ['business', 'businesso'], ['stock', 'sytock'], ['strategy', 'tactics strategy'], ['presence', 'troops presence'], ['primarily', 'primarily addition']]	7	2	1	2	0.980941	0.147226	0.0204843	0.0118855	0.0169581	1406	0.563508	0.00497866
805	Subject:devon accounting contact here is the point person for devon accounting questions/information:gary wade devon energy corporation revenue accounting supervisor tel 405-552-4721 wadeg@dvn.com 20 north broadway,suite 1500 oklahoma city,ok 73102-8260 fax 405-552-four thousand, five hundred fifty	0.997184	0.363488	['num_to_word']	[['4550', 'four thousand, five hundred fifty']]	1	1	2	1	0.634655	0	0.030303	0.131579	0.1	27	0.636512	0.037037
807	Subject:re:ios requests company user id password duke duke kyg 4399 g eprime eprime rpm 3752 p sempra sempra sew 2983 u coral coral bcy 8736 h texaco texaco xvn 4672 m western western zum 5763 n dynegy dynegy oyc 3527 a oneok oneok wrv 4782 x questar questar prk 5975 m reliant reliant hus 8953 w p.s.the iosadmin index.php password for this round is"adamant 2000"	0.973301	0.0116567	['get_semantic_related1']	[['admin', 'admin index.php']]	1	1	2	1	0.850793	0.45283	0.0589744	0.123077	0.164384	53	0.988343	0.0188679
846	Subject:do you know who..bkill,do you know who in huston keeps up the lotus notes detabase?there is a 2 week gap in the detabase between stream and archived records.just wondering if you know..virginya	0.997763	0.434541	['bitsquatting', 'omission', 'get_synonyms', 'bitsquatting', 'insertion']	[['virginia', 'virginya'], ['houston', 'huston'], ['current', 'stream'], ['database', 'detabase'], ['bill', 'bkill']]	5	1	2	1	0.890048	0.21875	0.28125	0	0.1	32	0.565459	0.15625
858	Subject:wellspring head shoreline wants to increase the volume at meter 9830 for the 10 th gas day.this is a new meter so there is not much history to it.they want to go from five hundred thirty-five to 750.last month it flowed in the upper 500's but it didn't come on till the 21 st of the month.	0.996855	0.236231	['get_synonyms', 'num_to_word']	[['well', 'wellspring'], ['535', 'five hundred thirty-five']]	2	1	2	1	0.889993	0.0740741	0.00823045	0.0166667	0.015625	54	0.763769	0.037037
875	Subject:re helsinki-2 nd report michael,here is my second report.the password is red.d-company tks robert	0.569962	0.136593	['get_semantic_related']	[['tks', 'd-company tks']]	1	1	2	1	0.822176	0.5	0.0505051	0	0	12	0.863407	0.0833333
886	subject:more updates-ios participants sempra gku 398 bp usgt kue 876 dg texaco qrp 394 mv coral wix 284 hc duke tqp four hundred eighty-two nb burlington ope 736 hy oneok pcv 768 ek williams mnoo 65 pu reliant byh 323 mg amoco ckh 468 om tenaska ukh 835 hy dynegy kyr 587 wm	0.934346	0.38301	['num_to_word']	[['482', 'four hundred eighty-two']]	1	1	2	1	0.892087	0.804878	0.804878	0.115385	0.125Episode	41	0.61699	0.0243902
932	Subject:maniacal guadalupe*the cablefilterz will allow you to receive all the channels that you order with your remote control grip,*payperviews,axxxmovies,sport events,special-events|http://www.9004 hosting.com/cable/gad,falter.	0.999864	0.0563759	['get_semantic_related1']	[['control', 'control grip']]	1	2	1	2	0.80888	0.368421	0.0271493	0.0769231	0.1	19	0.943624	0.0526316
948	Subject:entouch if your team would like to contribute to this week's online newsletter,please submit your business highlight or quote by noon,wednesday,february 28.thank you!kathie grabstald x 3-9610	0.93485	0.103621	['get_semantic_related']	[['newsletter', 'online newsletter']]	1	1	2	1	0.73444	0.26087	0.0263158	0.0540541	0.0789474	23	0.896379	0.0434783
1025	Subject:re:key contacts....c jamie;i wanted to exchange crucial phone numbers and contacts with you.if you'll reciprocate with key contacts for express pipeline i would appreciate it.if for some reason i am unavailablef and you wish to either purchase or sell mw voliumes,plefase feel free to contact diana scholtes on(503)464-3807.our pre-schedulef(one day or longer scheduling requirements)phone n…	0.999634	0.477382	['get_synonyms', 'addition', 'insertion', 'get_semantic_related1']	[['information', 'info'], ['le', 'lef'], ['volume', 'voliume'], ['hour', 'hour lasted']]	4	1	2	1	0.913073	0	0.0258065	0.0153846	0.0613208	146	0.522618	0.0273973
1039	Subject:bonanza 5000 my friends,this is really an opportunity that will make you super rich.that is my opinion!simply rephy to this message and include the postal address for me to send you the full information packet about bonanza 5000.if you do not decide to join bonanza 5000 immediately,keep the information in a safe place and read it often.you can check with me every now and then if you wish …	0.997953	0.0246422	['get_semantic_related1', 'bitsquatting', 'get_synonyms']	[['worked', 'worked started'], ['reply', 'rephy'], ['mail', 'messenger']]	3	2	1	2	0.957547	0.0806202	0.0868217	0.00645995	0	645	0.975358	0.00465116
1041	Subject:cell phones hey bill,eric linder and craig dean have reqested for me to order Modern cell phones for them.i tld them i would have to run it by you first.craig is actually in dire terrible need of a Modern phone,his phone doesnt even ring.it's pretty damaged.i will wait until i here further more from you to order these.in the future is there a procedureq you would like me to go through to …	0.99788	0.459931	['omission', 'get_semantic_related1', 'addition', 'omission', 'omission', 'get_synonyms', 'omission', 'get_semantic_related1']	[['thanks', 'tanks'], ['dire', 'dire terrible'], ['procedure', 'procedureq'], ['told', 'tld'], ["n't", 'nt'], ['new', 'Modern'], ['requested', 'reqested'], ['guy', 'guy man']]	8	1	2	1	0.865894	0.131579	0.0358209	0	0.0210526	76	0.540069	0.105263
1043	Subject:re:ios participants user id password sempra gku 398 bp usgt kue 876 dg texaco qrp 394 mv coral wix 284 hc d7uke tqp 482 nb burlington ope 736 hy oneok pcv 768 ek williams mnoo 65 pu reliant byh 323 mg amoco ckh 468 om	0.511474	0.0878578	['insertion']	[['duke', 'd7uke']]	1	1	2	1	0.925145	0.794118	0.1	0.108696	0.148936	34	0.912142	0.0294118
1050	Subject:a brand new opportunity to work from home!-lrmjq take grip control of your sprightliness today and make the money that you deserve!welcome to the last stop in your search for a true and total money making opportunity.we have studied marketing for years and have finally come to where we are able to deliver to you the most complete package available today!if you are looking for unlimited in…	0.999961	0.472758	['get_semantic_related', 'get_semantic_related', 'get_synonyms']	[['intended', 'originally intended'], ['control', 'grip control'], ['life', 'sprightliness']]	3	2	1	2	0.882362	0	0.00816327	0.00995025	0.0143541	175	0.527242	0.0171429
1054	Subject:easy summer income tae grip control of your financial future make$7,000/mnth learn how to get...5 money-making web sirtes dear fruiend,you're about to discover how you can have five of your own internet businesses set up and taking governs within 29 minutes...for less than half of what most people spend on groceries!but first,please let me introduce myself...hi!my name is frank kern.i'd l…	0.998421	0.498286	['insertion', 'get_semantic_related', 'get_synonyms', 'insertion', 'omission', 'get_synonyms', 'omission', 'get_synonyms', 'insertion', 'omission', 'omission', 'get_semantic_related']	[['opt', 'olpt'], ['control', 'grip control'], ['tried', 'tested'], ['friend', 'fruiend'], ['guru', 'gur'], ['computer', 'calculator'], ['take', 'tae'], ['order', 'govern'], ['site', 'sirte'], ['box', 'bo'], ['month', 'mnth'], ['coming', 'but coming']]	12	2	1	2	0.967959	0	0.0246679	0.0114504	0.0262172	201	0.501714	0.0597015
1055	Subject:vangelis i thought you might need this emd climax want more something se*xy mimetic receptor sumatra bobcat depart scheduled badinage they'd apprentice bluebonnet declamation bump amp bergland astigmat titus calculate cane sd statler gog unison dopant conqueror attendant nonchalant	0.966151	0.0126885	['get_semantic_related1']	[['depart', 'depart scheduled']]	1	2	1	2	0.896551	0.371429	0.0444444	0.0294118	0.0238095	35	0.987311	0.0285714
1088	Subject:adv:put your resume back to work dear candidate,we recently came across a posting of your resume on the internet.after our research,we determined that it was not posted on over 45 other top job sites.the impact to you is that over 83%of the employers and recruiters looking to hire candidates with your ski|1s are not reading your resume.is your resume taking the day off?while most people p…	0.917037	0.233304	['get_semantic_related', 'generatehom', 'get_semantic_related']	[['visit', 'saturday visit'], ['skill', 'ski|1'], ['strategy', 'plans strategy']]	3	2	1	2	0.964954	0.0878049	0.015025	0.0115385	0.0147601	205	0.766696	0.0146341
1089	Subject:0astoria update not done-but good progress:we reached agreement with the water bank late last night on the definitive agreement.the members of the bank are goimng to their respective boards today and tomorrow and are saying that they are prepared to sign tomorrow.they have flaked on us in the 0ast,so there is still a decent chance we dont get done soon,but in general we are pleased that t…	0.996482	0.418812	['generatehom', 'insertion', 'insertion', 'insertion', 'bitsquatting', 'addition']	[['clearly', 'clear|y'], ['chris', 'czhris'], ['going', 'goimng'], ['change', 'chyange'], ['past', '0ast'], ['gas', 'gasx']]	6	1	2	1	0.803355	0.12234	0.0259887	0	0.0405405	188	0.581188	0.0319149
1109	Subject:the expatriate diplomats zone-issue#1 2/14/00 the expatriate diplomats zone 1/15/00 issue#1 where every day is"just another shitty day in paradise"the zine for the tropically impaired---------------------------------in this issue*featured expatriate diplomats of the month-james"sunny jim"white*travel into"the zone"-and beat the irs at the same once time.*"jimmydotcom"-where's that parrot …	0.936979	0.445349	['omission', 'get_semantic_related1', 'get_semantic_related', 'insertion', 'addition', 'get_semantic_related', 'get_semantic_related', 'omission', 'get_semantic_related1', 'get_semantic_related', 'get_semantic_related', 'omission']	[['date', 'ate'], ['expatriate', 'expatriate diplomats'], ['page', 'editorial page'], ['suggest', 'syuggest'], ['little', 'littles'], ['site', 'online site'], ['web', 'search web'], ['includes', 'includs'], ['bad', 'bad nothing'], ['time', 'once time'], ['boy', 'child boy'], ['set', 'se']]	12	1	2	1	0.998619	0.23439	0.0410355	0.00952694	0.00940734	2146	0.554651	0.0055918
1118	Subject:more dalton baby info final updave.....i went to see dorothy,tim and the new baby on sun.he is absolutely beautiful and dorothy and tim couldn'u be prouder parents.his name is.....drake andrew dalton and that name suits him just fine!thanks.	0.998558	0.129318	['bitsquatting', 'word_weekday', 'bitsquatting']	[["n't", "n'u"], ['sunday', 'sun'], ['update', 'updave']]	3	1	2	1	0.90035	0	0.0446429	0	0.0204082	35	0.870682	0.0857143
1129	Subject:fw:energy crisis solve..an important visual describing our current energy crisis.-windmilldavis.gif	0.757808	0.242139	['omission']	[['solved', 'solve']]	1	1	2	1	0.820735	0.3	0.2	0	0	10	0.757861	0.1
1155	Subject:re:dun&bradstreet info for credit trading thank you for keeping us in the loop on this.d&b data will become one of our most important sources.as you suggest,the intent is to use this data along with other available date to generate a price for credit.the price will be published externally(|ike|y for a fee and as a free service)via the web or via automated processes.option 3 appears to be …	0.811276	0.35695	['get_semantic_related', 'get_semantic_related', 'get_synonyms', 'generatehom']	[['term', 'may term'], ['consideration', 'immediate consideration'], ['given', 'consecrate'], ['likely', '|ike|y']]	4	1	2	1	0.985689	0.128859	0.0196429	0.004	0.00572519	745	0.64305	0.00536913
1156	Subject:re:quasi good morning,i'd love to go get some coffee with you,but remember that annoying project that mike etringer wants me to work on for him?this morning i am kinda under some pressure to hurry up and try to get some stuff figured out so i really don't have much spare time right now.ja would flip out if i left for coffee now.maybe later this afternoon?or tomorrow morning?anyhow,another…	0.777612	0.45141	['get_synonyms']	[['know', 'fuck']]	1	1	2	1	0.81717	0.141104	0.0310078	0	0.00458716	163	0.54859	0.00613497
1166	Subject:plans for cables legal tv descarmbler want to watch sporting events?--movies?--pay-per-view??you can assemble from electronic srtore parts for about$12.00.we send you:e-z to follow assembly instructions e-z to read original drawings.electronic parts lists.plus something new you must have!something you can't do without.the up-to-date report reports:using a descrambler legally warning:you s…	0.936856	0.492943	['insertion', 'get_semantic_related1', 'omission', 'get_semantic_related1', 'get_semantic_related', 'addition', 'get_synonyms', 'get_semantic_related1']	[['store', 'srtore'], ['control', 'control grip'], ['detect', 'dtect'], ['report', 'report reports'], ['work', 'it work'], ['cable', 'cables'], ['television', 'television_set'], ['remote', 'remote devices']]	8	2	1	2	0.964849	0.0987013	0.0213169	0.0121457	0.0174757	385	0.507057	0.0207792
1186	Subject:organizational announcement i am extremely pleased to announce that jo williams has accepted the posituion as director of the pricing&structuring group!jo's business instincts,decision-making skills and overall management experience are an asset for our marketing effort.she will be helping to lead and organize our efforts to provide centralized pricing and structuring and to coordinate ou…	0.928656	0.451953	['insertion', 'bitsquatting', 'insertion', 'insertion', 'get_semantic_related']	[['promoted', 'promotded'], ['gas', 'gar'], ['position', 'posituion'], ['natural', 'natudral'], ['product', 'growth product']]	5	1	2	1	0.961653	0.10119	0.0169039	0	0.0149254	168	0.548047	0.0297619
1201	Subject:re:account#51682 f hello,we sent you an email a while ago,because you now q5alify for a will new mortgage.you could get$300,9000 for as little as$600 a month tuesday!bad credit is no problem,you can pull cash out or refinance.please click on this link for free consultationj by a mortgage brioker:start saving here best regards,oliver gabriel for email removal,go here.papua meliorate synthe…	0.90392	0.450253	['addition', 'insertion', 'get_semantic_related1', 'get_synonyms', 'bitsquatting', 'get_semantic_related', 'insertion']	[['consultation', 'consultationj'], ['broker', 'brioker'], ['month', 'month tuesday'], ['make', 'bring_in'], ['qualify', 'q5alify'], ['new', 'will new'], ['300,000', '300,9000']]	7	2	1	2	0.909988	0	0.0289389	0.0526316	0.0802469	136	0.549747	0.0514706
1203	Subject:drug test ill-as i am not sure whether or not craig gets his e-mails,can you please pass this along.there is a first for everything!my----------------------forwarded by my fitzpatrick/pdx/ect on 04/09/200| 12:16 pm---------------------------my fitzpatrick 04/02/200| 08:24 am to:craig dean/pdx/ect@ect cc:subject:drug test craig-i just received notice that there was a collector error on you…	0.934845	0.100145	['omission', 'omission', 'generatehom']	[['bill', 'ill'], ['amy', 'my'], ['2001', '200|']]	3	1	2	1	0.874079	0.272727	0.0338542	0.01	0.00961538	66	0.899855	0.0454545
1211	Subject:chekc out the puppies please removeh me	0.88523	0.165921	['addition']	[['remove', 'removeh']]	1	2	1	2	0.6042	0	0.0512821	0	0.25	5	0.834079	0.2
1217	Subject:your membership exchange,#442 your membership exchange,issue#442 august 6,2001 this email was sent to jm@netnoteinc.com,at your request,by your membership newsletter services.visit our subscription center to edit your interest values or unsubscribe.view our privacy policy.powered by	0.998712	0.356244	['get_semantic_related1']	[['interest', 'interest value']]	1	2	1	2	0.763602	0.225806	0.0202703	0.0425532	0.0408163	31	0.643756	0.0322581
1232	Subject:32,000 mmbtu nom remains in place;7,000 mmbtu from fuels cotton val|ey,25,000 mmbtu into valeroi no nom variety on purchase and sale-eastrans for 2/10/2000-(se reference).reduce sale to five hundred mmbtu/d from fuels cotton val|ey for 2/10/2000.	0.999765	0.463427	['generatehom', 'num_to_word', 'get_synonyms', 'omission']	[['valley', 'val|ey'], ['500', 'five hundred'], ['change', 'variety'], ['see', 'se']]	4	1	2	1	0.939598	0	0.047619	0.0714286	0.0612245	33	0.536574	0.121212
1243	Subject:here is your new password dear applicant,your application was processed and approved.you are eligible for a 2.3%rate and a$400,000 loan.please verify your information here:we look sure forward to hearing from you.regards,bruno _ logan senior account manager steve webber financial association	0.999388	0.0569427	['get_semantic_related1', 'get_semantic_related1']	[['look', 'look sure'], ['manager', 'manager steve']]	2	2	1	2	0.791619	0.135135	0.135135	0	0	37	0.943057	0.0540541
1264	Subject:well arm heads phillips has change wouldd there nom at meter 6673.vance had 119 in his file but phillips sent in a nom today for 948.so far it has flowed for april between 1100 and 841.prize has some change woulds.meter from to marc low range.4028 1113 717 1137 to 887 5579 2733 2381 28900 to 2578 5767 115 150 140 to 103 6191 249 154 253 to 217 6675 120 239 78 to 156 9604 109 32 38 to 63 4…	0.986848	0.177719	['get_semantic_related1', 'get_semantic_related', 'get_semantic_related1', 'get_semantic_related', 'omission', 'insertion', 'num_to_word']	[['mom', 'mom sister'], ['head', 'arm head'], ['change', 'change would'], ['range', 'low range'], ['march', 'marc'], ['2800', '28900'], ['303', 'three hundred three']]	7	1	2	1	0.909563	0.13253	0.0198556	0.0654206	0.0701754	83	0.822281	0.0843373
1274	Subject:insightful media article on california power prices mark golden is an excellent reporter covering the power scene.our takeaways:*power prices are declining in california as the"destruction of demand"effect of higher retail power prices kicks in.*the long-term power contracts signed by the various power producers and energy merchants are looking like saweetheart deals for them,as evidence …	0.998894	0.416462	['addition', 'get_semantic_related1', 'bitsquatting', 'addition', 'get_synonyms', 'get_semantic_related', 'insertion', 'get_semantic_related1']	[['curve', 'curvef'], ['buying', 'buying stock'], ['major', 'oajor'], ['gov', 'govc'], ['great', 'with_child'], ['announced', '2005 announced'], ['sweetheart', 'saweetheart'], ['last', 'last came']]	8	1	2	1	0.960095	0	0.0211773	0.00349345	0.010084	802	0.583538	0.00997506
1289	Subject:real vallum..real xnax,...holiefield overnite to your door...bmst deals pig penm 51 bubbple baths orvder bfrand namme rux prescridptisons from the coomfort of your home.vavliunm...xagnaxx...muach more....brand nahme from the usa go _ hrere attentive gal lavatory dickinson zip bonnet bali stuyvesant catalystc china headstand hostess tower bachelor durkee cupric bondholder shade zombie plag…	0.835999	0.447647	['addition', 'get_semantic_related1', 'get_semantic_related', 'bitsquatting', 'addition', 'addition', 'insertion', 'insertion', 'addition']	[['gyp', 'gypr'], ['zombie', 'zombie plaga'], ['overnite', 'holiefield overnite'], ['est', 'mst'], ['catalyst', 'catalystc'], ['insult', 'insultx'], ['bubble', 'bubbple'], ['lyricism', 'lyric9ism'], ['pen', 'penm']]	9	2	1	2	0.789897	0	0.049951	0.0707965	0.192	108	0.552353	0.0833333
1291	Subject:tradition percy@the cablefilterz will allow you to receive all the channels that you order with your remote control grip,)payperviews,axxxmovies,sport events,special-events%http://www.aol 43566.com/cable/elbow,exhort.	0.999212	0.034276	['get_semantic_related1']	[['control', 'control grip']]	1	2	1	2	0.800852	0.421053	0.0327103	0.075	0.097561	19	0.965724	0.0526316
1344	Subject:new arrival??hi out there,welllllllll!!!what's the words?arrogate baby is here and you are all kicked back with nothing going on(chuckle).when you have time give me a call(again chuckle)k4en-attl.htm	0.999013	0.0749248	['addition', 'get_synonyms', 'insertion']	[['word', 'words'], ['assume', 'arrogate'], ['ken', 'k4en']]	3	1	2	1	0.840801	0.0740741	0.037037	0.0217391	0	27	0.925075	0.111111
1347	Subject:re:you still look the same!great gift idea!click here for a free bottle!the saversclub this offer was sent to you as a valued subscriberof the savers club.if you would prefer not to receive further emessengers fromthe savers club and wish to remove your name and e-messenger address from our database,please click here.or write us at:md,38900 fm 1774,magnolia,tx 77355	0.987824	0.00604194	['get_synonyms']	[['mail', 'messenger']]	1	2	1	2	0.703312	0.166667	0.166667	0.0547945	0	48	0.993958	0.0208333
1368	Subject:sap expense report forms please remember,when completing your expense reports,pull file from intranet by:selecting sap on hme page select-quick referencing tools(left side of page)select-account payable forms select-sap expense report form complete this task every time you would like to complete an expense report.each report is time-dated and is considered a reference number.remember your…	0.973525	0.481068	['addition', 'insertion', 'get_semantic_related1', 'bitsquatting', 'get_semantic_related', 'omission']	[['sheet', 'sheeti'], ['often', 'oftzen'], ['stop', 'stop way'], ['question', 'qumstion'], ['membership', 'entry membership'], ['home', 'hme']]	6	1	2	1	0.890042	0.146067	0.0168421	0.048951	0.0680272	89	0.518932	0.0674157
1375	Subject:re:domain registration savings public announcement:the new domain names are finally available to the general public at discount prices.now you can register one of the exciting new.biz or.info domain names,as well as the original.com and.net names for just$14.95.these brand new domain extensions were recently approved by icann and have the same rights as the original.com and.net domain nam…	0.999938	0.254888	['get_semantic_related1']	[['control', 'control grip']]	1	2	1	2	0.915702	0.0546875	0.00655022	0	0	128	0.745112	0.0078125
1413	Subject:your membership exchange,issue#422 content-type:text/plain;charset=iso-8859-1 _ _ _ _ _ _ _ _ _ _ _ _ _ _ _ _ _ _ _ _ _ _ _ _ _ _ _ _ _ _ _ _ _ _ _ _ _ _ _ _ _ _ _ _ _ _ _ _ _ _ _ _ _ _ your membership exchange issue#422 06-25-01 your place to exchange ideas,ask questions,swap links,and share your skills!_ _ _ _ _ _ _ _ _ _ _ _ _ _ _ _ _ _ _ _ _ _ _ _ _ _ _ _ _ _ _ _ _ _ _ _ _ _ _ _ _ _ _…	0.90094	0.0902583	['get_semantic_related1', 'get_semantic_related1']	[['isps', 'isps wireless'], ['control', 'control grip']]	2	2	1	2	0.968856	0.120047	0.0279835	0.0794603	0.0891089	858	0.909742	0.002331
1432	Subject:status report removed attached is the may 25 status report and scorecard:	0.774191	0.0113328	['get_semantic_related']	[['attached', 'removed attached']]	1	1	2	1	0.608169	0.181818	0.0131579	0	0	11	0.988667	0.0909091
1435	Subject:meet scheduled local women click here to be removed	0.999996	0.205522	['get_semantic_related1']	[['meet', 'meet scheduled']]	1	2	1	2	0.611207	0.125	0	0	0	8	0.794478	0.125
1439	Subject:fwd:transferring today?rn$0 by tomom.nling,nmicks,npe...juest incr honeple.e arpting onlicatir aited tio apayjupy thowing uto yowser tt staay...wwlearunts.us owners holiday's holidays default's.trap pack carefully log society's home advising.reference home's affair reference's honest expressing dissatisfaction expression trap's hope affair's define pack's softi.	0.878324	0.155408	['get_semantic_related1', 'addition']	[['expressing', 'expressing dissatisfaction'], ['soft', 'softi']]	2	2	1	2	0.748162	0.526316	0.526316	0.12069	0	38	0.844592	0.0526316
1443	Subject:75%off all holiday vacations	0.948025	0.0152738	['get_semantic_related']	[['vacation', 'holiday vacation']]	1	2	1	2	0.805596	0.25	0	0	0	4	0.984726	0.25
1452	Subject:mining loggingnews.net newsletter-friday,january 02,2004n friday,january 02,2004n mining loggingnews.net to allow you to read the stories below,we have arranged a complimentary one month subscription for you.to accept,click here to visit our extended service at www.mining loggingnews.net.alternatively,just click any of the stories below.should you wish to discontinue this service,you may …	0.939753	0.435029	['bitsquatting', 'get_semantic_related', 'get_semantic_related1', 'bitsquatting', 'addition']	[['investment', 'invesvment'], ['producer', 'composer producer'], ['mining', 'mining logging'], ['country', 'cowntry'], ['2004', '2004n']]	5	2	1	2	0.882348	0	0.0257812	0.018797	0.056713	616	0.564971	0.00811688
1478	Subject:meoh upset the earliest time production of meoh may begin is now sun evening.	0.999718	0.331063	['word_weekday']	[['sunday', 'sun']]	1	1	2	1	0.622025	0	0.0204082	0	0.133333	13	0.668937	0.0769231
1497	Subject:we buy your new charset=iso-8859-1">thank you in advance for taking the time to review this emessenger.i am not selling anything.allow our liquidation service to convert your problem inventory into quick cash.please contact me right away if you have any of these and/or other data media available.we are a leader in the industry for liquidation and recycling of these materials.our network o…	0.992536	0.0920161	['bitsquatting', 'addition', 'bitsquatting', 'get_semantic_related1', 'get_semantic_related', 'insertion', 'get_synonyms']	[['payment', 'piyment'], ['name', 'namel'], ['interested', 'interestdd'], ['fax', 'fax (310)'], ['etc', 'lb2 etc'], ['business', 'buzsiness'], ['mail', 'messenger']]	7	2	1	2	0.83185	0.178899	0.211009	0.0311615	0	218	0.907984	0.0321101
1498	Subject:now you can be more popular with women i've been using your product for 4 months now.i've increased my length from 2 to nearly 6.your product has saved my sex lifee.-matt,fl my girlfriend loves the results,but she doesn't know what i do.she thinks it's natural-thomas,ca pleasure your partner every time with a bigger,longer,stronger unit realistic gains quickly to be a stud press here the …	0.509582	0.309016	['addition']	[['life', 'lifee']]	1	2	1	2	0.932244	0.183206	0.0301508	0	0	131	0.690984	0.00763359
1502	Subject:news alebt(cinm)launches new product with t-mobile cinm highlights about cinm a relatively small percentage penetration rate could possibly translate into mkillions of dollars of revenue to cinm.cinemaelectric,Iraqi_National_Congress.launches pocketcinema video on mobile phones with t-mobile europe 40+mkillion subscribers cinema hollywood,california?march 15,2004.cinemaelectric,Iraqi_Nati…	0.974481	0.299897	['get_synonyms', 'generatehom', 'insertion', 'addition', 'get_semantic_related1', 'bitsquatting', 'get_semantic_related', 'get_synonyms']	[['inc', 'Iraqi_National_Congress'], ['believed', 'beIieved'], ['million', 'mkillion'], ['motion', 'motiont'], ['girl', 'girl man'], ['alert', 'alebt'], ['hollywood', 'cinema hollywood'], ['sale', 'sales_agreement']]	8	2	1	2	0.980782	0.161663	0.0238963	0.0276212	0.0410509	1299	0.700103	0.00615858
1566	Subject:re:just select"be ordained"to complete the process re:just select"be ordained"to complete the process become a legally ordained minister within 48 hours as a minister,you will be authorized to perform the rites and ceremonies of the church!perform weddings,funerals,and perform baptisms forgiveness of sins and visit correctional facilities want to open a church?check out ministry in a box …	0.999857	0.436792	['get_semantic_related']	[['cancel', 'scheduled cancel']]	1	2	1	2	0.879679	0.0896552	0.0128617	0.00526316	0.0052356	145	0.563208	0.00689655
1573	Subject:here's my performance evaluation choices:gary hanks-pipeline operations morgan sharifi-desk to desk business greg steagall-transportation/invoicing julie meyers-contract admin index.php charlotte hawkins-hplc ops please let me know if you think i should list anyone else.thanks.	0.999974	0.0588558	['get_semantic_related1']	[['admin', 'admin index.php']]	1	1	2	1	0.708915	0.392857	0.0423729	0	0	28	0.941144	0.0357143
1588	Subject:pocket micro scope id:sxo 483 re:ppql 308243023 not interestad,please let us know:powerlinepromo@yahoo.com	0.828391	0.427952	['bitsquatting', 'bitsquatting']	[['683', '483'], ['interested', 'interestad']]	2	2	1	2	0.793186	0	0.045977	0.176471	0.25	10	0.572048	0.2
1590	Subject:3 silk ties for$3 through this offer,you get up to 3 of our 100%hand-made silk ties for only$3.00 each,plus$7.95 shipping,handling&processing.if you select more than 3 ties,you will be charged an additional$14.95 per tie.upon accepting this offer,you are scheduled schedule to receive one of our hand-made silk neckties every month for our regular club price of just$24.95,plus$4.95 shipping…	0.896167	0.295917	['insertion', 'get_semantic_related', 'get_semantic_related1', 'bitsquatting', 'get_semantic_related1']	[['palio', 'palkio'], ['membership', 'bloc membership'], ['meeting', 'meeting week'], ['mailing', 'mailyng'], ['scheduled', 'scheduled schedule']]	5	2	1	2	0.950032	0	0.0168919	0.0362694	0.0452261	127	0.704083	0.0393701
1593	Subject:cfp:int.conf.on web delivering of music,wedelmusic 2004,barcelona,spain sorry for any multiple reception of this message.if you do not want to receive further information about wedelmusic 2004,please send back an emaih with remove on the subject.the topics of this e-mail are:call for papers,submission deadline:27 th february 2004 4 th international conference on web delivering of music,we…	0.830517	0.260574	['bitsquatting', 'omission', 'get_semantic_related']	[['email', 'emaih'], ['becoming', 'becomin'], ['control', 'grip control']]	3	2	1	2	0.982799	0	0.0237172	0.00745573	0.0216022	754	0.739426	0.00397878
1676	Subject:re:conscription capital charge memo we'll believably get this implemented flop when we stop generating margin calls.i vote we implement this on a retroactive basis!	0.999274	0.295784	['get_synonyms', 'get_synonyms', 'get_synonyms']	[['probably', 'believably'], ['right', 'flop'], ['draft', 'conscription']]	3	1	2	1	0.760643	0.0869565	0.00564972	0	0	23	0.704216	0.130435
1680	Subject:re:midcoast marketing the deals are in and the ticket numbers are jane.214249 and feb.214251.	0.756264	0.160858	['addition']	[['jan', 'jane']]	1	1	2	1	0.752801	0.307692	0.230769	0.111111	0	13	0.839142	0.0769231
1695	Subject:feedback from tricks of the trade training class good morning!if you have done so already,can you please return your feedback to me asap?thanks!my	0.688838	0.323299	['omission']	[['amy', 'my']]	1	1	2	1	0.858171	0.136364	0.00735294	0	0	22	0.676701	0.0454545
1715	Subject:voice recording dear bill,below please find a voice recording of a tape that i have pulled.i hink this is a good example of a clear re-cap,which comes in handy and leaves no question as to price,volume,or time.tzhanks,virginia	0.936559	0.417501	['insertion', 'omission']	[['thanks', 'tzhanks'], ['think', 'hink']]	2	1	2	1	0.842215	0	0.03125	0	0.0196078	36	0.582499	0.0555556
1748	Subject:portraits for commission from photos portraits for commission from photos send us your photograph with high resolution and detailed comments for future portrait.we will discuss all necessary subjects and details that should be present on portrait.after that our artists will start working on your portrait order.usually,it takes 2-3 business weeks to complete oil portrait and make it dry.fo…	0.833673	0.456861	['get_semantic_related1', 'get_semantic_related1', 'get_synonyms', 'get_semantic_related']	[['follow', 'follow adhere'], ['word', 'word spoken'], ['brush', 'light_touch'], ['finished', 'team finished']]	4	2	1	2	0.96413	0.105528	0.0166038	0	0.00319489	199	0.543139	0.0201005
1770	Subject:hl&p fdow here are the most recent numbers.	0.942106	0.490614	['bitsquatting']	[['flow', 'fdow']]	1	1	2	1	0.659133	0.285714	0.0434783	0	0.1	7	0.509386	0.142857
1838	Subject:california 2/13 for heads contact robert johnston at x 39934.court cae denies rate hikes as forecast in our report yesterday,the federal court in mos angeles refused to allow the seven two california utilities to raise rates to recoup undercollections of their power costs since last august.we had expected that the court would rule in favor of the utilities,but push the rate hike head to a…	0.95211	0.478238	['get_semantic_related', 'addition', 'get_synonyms', 'omission', 'omission', 'addition', 'addition', 'bitsquatting', 'get_synonyms', 'omission', 'get_synonyms']	[['two', 'seven two'], ['deal', 'dealu'], ['agreed', 'agree'], ['case', 'cae'], ['take', 'tke'], ['break', 'breakd'], ['thursday', 'thursdayj'], ['los', 'mos'], ['question', 'head'], ['march', 'marc'], ['ruling', 'dominate']]	11	1	2	1	0.987267	0.111317	0.0210758	0.00764526	0.0105581	539	0.521762	0.0204082
1841	Subject:urgent news alert(otcbb:agel)news alert stockh profile urgent news release about company investment highlights investment opportunity market and growth potential of online gaming it is estimated that in excess of a trillion dollars is wagered annually worldwide on the various forms of gambling.the growth of the internet has far exceeded the growth of any other communication metium in the …	0.97862	0.191581	['addition', 'addition', 'get_semantic_related', 'get_synonyms', 'bitsquatting', 'addition', 'bitsquatting', 'get_synonyms', 'bitsquatting']	[['stock', 'stockh'], ['grown', 'grownn'], ['advisor', 'advisory advisor'], ['business', 'job'], ['1996', '1916'], ['bet', 'beto'], ['medium', 'metium'], ['revenue', 'receipts'], ['2005', '200u']]	9	2	1	2	0.991585	0.132007	0.0205141	0.0164722	0.0241935	1106	0.808419	0.00813743
1852	subject:roderick just open it just like the originalbut less than but half the pricepowerful effects monster rewards geeeeeeneriic viiagraaaaa direct from the manufacturer you trust!buy righ now!worldwide shipping chaaaaange.	0.998592	0.0302505	['get_semantic_related', 'omission']	[['half', 'but half'], ['right', 'righ']]	2	2	1	2	0.812806	0.291667	0.333333	0.151515	0.147059	24	0.969749	0.0833333
1854	Subject:expense please notify me if you have any outstanding items that should be expensed.all invoices(mobile communications,pager,etc.)and travel arrangements should be passed on to me as well.many thousands thanks,barbara lewis x 35085(bl/635)	0.965169	0.403292	['get_semantic_related1', 'get_semantic_related1']	[['mobile', 'mobile communications'], ['many', 'many thousands']]	2	1	2	1	0.704889	0.142857	0.107143	0.0222222	0.0208333	28	0.596708	0.0714286
1858	Subject:grants!no credit checks,no collateral!could you use a*free*grant?this is a limited offer for all those in need of a free grant.and those that qualify will be eligible for up to but,not exceeding$5,000,000.most free grants are from$10,000 to$156,000.do i qualify?did you know?no longer are free grants the domain of the privileged and choibe few,but now they can be awarded to everyday people…	0.869843	0.455753	['bitsquatting', 'omission']	[['choice', 'choibe'], ['best', 'bet']]	2	2	1	2	0.855105	0	0.0207715	0	0.00645161	107	0.544247	0.0186916
1878	Subject:turn$5 into$20 k-(pay pal)vdbs this e-mail ad is being sent in full compliance with u.s.senate bill 1618,title#3,section 01 to remove yourself send a blank e-mail to:removal 992002@yahoo.com hi,you most likely have seen or heard about"the letter"$5.00 paypal program"that has been seen lately on 20/20 and oprah winfrey...etc...how would you like to generate more income through a different …	0.625676	0.190184	['get_synonyms', 'insertion', 'omission']	[['going', 'get_going'], ['wall', 'wsall'], ['301', '01']]	3	2	1	2	0.995929	0.105982	0.0208201	0.0021777	0.00299529	1538	0.809816	0.00195059
1903	Subject:get g:eneric jeff via-gra for a s low as$2.50 per 50 mg her type http://dutchess.reado 893.com/xm/	0.999703	0.351436	['get_semantic_related1']	[['eric', 'eric jeff']]	1	2	1	2	0.623838	0	0.0547945	0.0833333	0.08	14	0.648564	0.0714286
1919	Subject:marking chairs hello all:unfortunately,in the last two weeks we have had two of our rzesearch"chairs"disappear from their location.we have reported this to security,but in all likelihood they will be almost impossible to locate.facilities has told us that they are not responsible for missing chairs and we will have to order new ones.since they are very expensive,we have decided to"mark"ou…	0.929032	0.301436	['get_semantic_related1', 'insertion', 'insertion']	[['take', 'take taking'], ['thanks', 'thabnks'], ['research', 'rzesearch']]	3	1	2	1	0.85237	0.154639	0.0305927	0	0.0147059	97	0.698564	0.0309278
1922	Subject:daphne edwards}the cablefilterz will allow you to receive all the channels that you order with your remote control grip payperviews,axxxmovies,sport events,special-events _ _ http://www.8005 hosting.com/cable/aim,this torture went.	0.999897	0.0572859	['get_semantic_related1']	[['control', 'control grip']]	1	2	1	2	0.824323	0.409091	0.0334728	0.1	0.097561	22	0.942714	0.0454545
1925	Subject:willis phillips we would like to hire willis phillips from koch.rogers,dana,&i have all interviewed him and think he is a can't miss candidate.the bad news is that he was referred by a headhunter(the fee is 20%of first year 2005 package).this guy is quality and i want to make an offer.please let me know if i can proceed asap.	0.998694	0.157193	['get_semantic_related1']	[['year', 'year 2005']]	1	1	2	1	0.877534	0.175439	0.157895	0	0	57	0.842807	0.0175439
1932	Subject:reliant to split itself into two publicly traded companies news briefs:reliant energy plans to form two public companies reliant energy said it plans to file with the texas public utility commission a business separation plan under which it would divide into two publicly traded companies to separate its unregulated businesses from its regulated businesses.the company plans an initial publ…	0.969421	0.495123	['get_semantic_related1']	[['year', 'year 2005']]	1	1	2	1	0.962343	0.116379	0.112069	0.00348432	0	232	0.504877	0.00431034
1964	Subject:here's that stock tech analysis site i told you about-very bullish-thu,29 apr 2004 08:59:47-0500 thu,29 apr 2004 08:59:47-0500 here is that stock-market technical analysis site we discussed about that smart card stock.according to them,it reads bullish for the long term,and the candlestick reads very bullish,a homing pigeon.they are usually right on the mark.also,here is the interview wit…	0.65844	0.422634	['bitsquatting']	[['info', 'infg']]	1	2	1	2	0.936966	0	0.023374	0.0518135	0.0528846	104	0.577366	0.00961538
1973	Subject:re:as expected!we look at ice volu-e reports every day and they are doing about 10-20%of the volu-es(and#transactions)we are doing on eol.we are doing 300-350 transactions per day in east power and ice does approx.45-50 transactions per day.	0.999971	0.488906	['bitsquatting']	[['volume', 'volu-e']]	1	1	2	1	0.708904	0.0810811	0.020202	0	0.037037	37	0.511094	0.027027
2002	subject:ireland's first great world cup result oconnor quickly moved his cursor down the left side of the web page.then,suggesting showing a flash of his silky skills,he cut across to the righ even hand side and clicked on top ten special offers.he zipped past the irish chicken breast fillets at 25%off,nipped round the hb selections ice cream also at 25%off and went on with the goal firmly in sig…	0.994566	0.317021	['get_synonyms', 'bitsquatting', 'get_semantic_related', 'get_semantic_related', 'generatehom', 'get_semantic_related1', 'get_semantic_related1', 'get_semantic_related', 'omission']	[['offer', 'go'], ['club', 'blub'], ['half', 'but half'], ['showing', 'suggesting showing'], ['click', 'c|ick'], ['buy', 'buy get'], ['maximum', 'maximum limits'], ['hand', 'even hand'], ['right', 'righ']]	9	2	1	2	0.847478	0.130909	0.127273	0.00265957	0.00254453	275	0.682979	0.0327273
2016	Subject:re[23]in 1986 to deal with you how's sprightliness?here is myswimming pools fine,thanks.	0.69518	0.0622027	['get_synonyms']	[['life', 'sprightliness']]	1	2	1	2	0.753461	0.25	0.0273973	0.05	0.05	12	0.937797	0.0833333
2029	Subject:this 12 minute movie will change your life.h now is the time!don't miss the second wave!there is still opportunity to capitalize!open the door to your future!it's never too late!find out how i turned$25 into nearly$4,000 in 8 days and how you can do the same!all you need to do is take 12.5 minutes out of your schedule to watch this lifechanging movie.find out how byclicking below!don't wa…	0.99804	0.328965	['get_synonyms']	[['mail', 'messenger']]	1	2	1	2	0.947643	0.147059	0.137255	0.0197368	0	102	0.671035	0.00980392
2038	Subject:global risk management operations congratulation conveyeds on your own new responsibilities.i look seem forward to hearing more about this and how i might contribute.	0.958335	0.453893	['get_semantic_related1', 'get_semantic_related', 'get_semantic_related1']	[['look', 'look seem'], ['new', 'own new'], ['congratulation', 'congratulation conveyed']]	3	1	2	1	0.752677	0.130435	0.130435	0	0.0384615	23	0.546107	0.130435
2073	Subject:get the child support you deserve 10.124 1)join the web's hottest&fastest growing community 2)guaranteed to lose 10-12 lbs in 30 days slim patch-weight loss patches 3)get the child support you deserve-free legal advice 4)fight the risk of cancer-save your lungs 5)start your online private photo album have a wonderful day,offer manager steve prizemama if you wish to leave this list please …	0.998625	0.135954	['get_semantic_related1']	[['manager', 'manager steve']]	1	2	1	2	0.878904	0.0714286	0.0714286	0	0	56	0.864046	0.0178571
2087	Subject:attitudes about foreigners that some japanese hold because of unique aspects of their language and culture,the japanese generally find it far easier to deal with each other than with foreingers.in some japanese,this unease can lead to some unappealing attitudes and behaviors.the japanese maintain a very clear distinction between an individual's public and private faces,so that it is rare …	0.808912	0.369258	['insertion']	[['april', 'aptril']]	1	1	2	1	0.952351	0.207182	0.0288387	0.015873	0.0189394	362	0.630742	0.00276243
2100	Subject:volleyball we are in need of additional volleyball fans to play tonight@7 pm@Robert_Woodrow_Wilson high school.please see paul choi or me if you are available!	0.773739	0.46506	['get_synonyms']	[['wilson', 'Robert_Woodrow_Wilson']]	1	1	2	1	0.850929	0.173913	0.0275862	0	0	23	0.53494	0.0434783
2104	Subject:fwd:billing question return-path:received:from rly-yao 2.mx.aol.com(rly-yao 2.mail.aol.com[172.18.144.194])by air-yao 2.mail.aol.com(v 67.7)with esmtp;mon,10 jan 2000 06:39:16-0500 received:from abbott.office.aol.com(abbott.office.aol.com[10.2.96.24])by rly-yao 2.mx.aol.com(8.8.8/8.8.5/aol-4.0.0)with esmtp id gaa 26342 for;mon,10 jan 2000 06:39:16-0500(est)received:from sunphol.ops.aol.co…	0.815281	0.121484	['get_semantic_related', 'get_semantic_related', 'insertion']	[['collected', 'accumulated collected'], ['contact', 'phone contact'], ['resubmit', 'reshubmit']]	3	1	2	1	0.979974	0.172414	0.0218955	0.0241327	0.0336134	406	0.878516	0.00738916
2166	Subject:hundred twenty biggest customers thanks for the help,but i don't think i asked the right question.i need the the hundred twenty biggest customers on the purchase side.sorry for the misuderstanding.if you could send a list that would be great.no hurry,sorry again for the inconvenience.	0.94919	0.0390865	['get_semantic_related']	[['twenty', 'hundred twenty']]	1	1	2	1	0.673285	0.2	0.0311284	0.0192308	0.0185185	40	0.960913	0.025
2167	Subject:free pay per view had chance at last to view the warner bros.legends collection.all in all,not a bad deal,though yankee doodle dandy is not to my taste as entertainment,and the cartoons offered on that one are the most superfluous."yankee doodle bugs"whose transfer is atrocious),those cartoons are also on looney tunes:the golden collection.the other two movies,the adventures of robin hood…	0.992571	0.171654	['bitsquatting', 'get_semantic_related1']	[['cross', 'gross'], ['expected', 'expected scheduled']]	2	2	1	2	0.970276	0	0.0360036	0.0118812	0.00736648	416	0.828346	0.00480769
2180	Subject:new hire training opportunity please click on the link below to review an invitation for a great opportunity for new hire network tv members.	0.738071	0.174787	['get_semantic_related1']	[['network', 'network tv']]	1	1	2	1	0.641531	0.0454545	0.0454545	0	0	22	0.825213	0.0454545
2203	Subject:well?x information files disney in 1915 stemma quotesin 1844 in short.	0.88868	0.0910206	['get_semantic_related', 'get_synonyms']	[['file', 'information file'], ['stock', 'stemma']]	2	2	1	2	0.626885	0	0.038961	0.0769231	0.142857	11	0.908979	0.181818
2211	Subject:real time-stca activity for 6/12 here are those changes.i'll leave re-sending the file to your attention.	0.960553	0.496766	['get_synonyms']	[['discretion', 'attention']]	1	1	2	1	0.662823	0.2	0.133333	0.05	0.0454545	15	0.503234	0.0666667
2216	Subject:august palo verde my latest obtain information on low rate increases in cadifornia indicates that they will be implementedj june lst.that means that customers don't why see a price signal until june and won't why fact actually see their bilm until july.while i agree with greg that we may see dramatic demand side response once people see their bilms,we have no idea how long it will take pe…	0.998988	0.429495	['bitsquatting', 'get_semantic_related', 'get_semantic_related', 'bitsquatting', 'get_semantic_related1', 'get_synonyms', 'addition', 'get_semantic_related', 'bitsquatting', 'bitsquatting', 'bitsquatting', 'get_semantic_related1']	[['bill', 'bilm'], ['rate', 'low rate'], ['information', 'obtain information'], ['california', 'cadifornia'], ['pushed', 'pushed rolled'], ['run', 'bleed'], ['implemented', 'implementedj'], ['actually', 'fact actually'], ['bottom', 'bottoo'], ['fairly', 'fairny'], ['short', 'shopt'], ["n't", "n't why"]]	12	1	2	1	0.819454	0.103286	0.0298013	0	0.0245902	213	0.570504	0.056338
2221	Subject:mtbe upset the mtbe planth had an upset earoly today and a steam boiler is being taken out of service.prouction will be cute back to app5roximately 8 mbd to 9 mbd for four to five ten days.	0.988662	0.358457	['omission', 'get_semantic_related1', 'addition', 'insertion', 'insertion', 'addition']	[['production', 'prouction'], ['five', 'five ten'], ['cut', 'cute'], ['approximately', 'app5roximately'], ['early', 'earoly'], ['plant', 'planth']]	6	1	2	1	0.658168	0	0.0368421	0	0.102564	34	0.641543	0.176471
2230	subject:leonard how can we make this happen?just like the originalbut less than but half the pricepowerful effects monster rewards geeneriiiiiic viiiiiagraa direct from the manufacturer you trust!buy righ now!worldwide shipping chaaange.	0.999775	0.040649	['get_semantic_related', 'omission']	[['half', 'but half'], ['right', 'righ']]	2	2	1	2	0.819684	0.259259	0.296296	0.135135	0.131579	27	0.959351	0.0740741
2243	Subject:the debt-$aver program skyxtgm lawsuit copyright 2002-all rights reservedif you would no longer like us to contact you or feel that you havereceived this email in error,please click here to unsubscribe.	0.993106	0.0231668	['get_semantic_related']	[['copyright', 'lawsuit copyright']]	1	2	1	2	0.75054	0	0.0271739	0.0857143	0.0833333	28	0.976833	0.0357143
2260	Subject:off duty days good morning all:most of you do this,but just in case,please advise me of any off duty days,i.e.vacation,sick,personal,jury duty,etc.as soon as possible,either before or as soon as you take them.also,i am making new wallet info cards and if you have not sent me your home telephone number,or if you have a new one,please let me know as soon as possible.thanks and have a great …	0.527601	0.127445	['bitsquatting']	[['shirley', 'shirlex']]	1	1	2	1	0.949595	0.190476	0.0338462	0	0.0102041	63	0.872555	0.015873
2261	Subject:data message-id:from:jasper 5645@yahoo.com bcc:subject:secrets of the ultra wealthy revealed...date:sun,04 aug 2024 06:40:35-0400(edt)mime-version:1.0 content-type:txt/html;charset="us-ascii"content-transfer-encoding:7 bit for years,hedge investors have made money in both bear and bull markets.but until recently,hedge trading has been limited to only the ultra wealthy and well connected i…	0.972764	0.243619	['get_semantic_related', 'omission']	[['click', 'folder click'], ['text', 'txt']]	2	2	1	2	0.950473	0.192982	0.025522	0.010989	0.0159574	114	0.756381	0.0175439
2271	Subject:energy central conference watch-07-15-00 attached is the latest listing of upcoming conferences.if you want additional information on them,you can request it from energy central.lorna energy central conference watch coveringz trade shows,conferences and sseminars for the power industry week ending july 14,2000 this update is a free supplement to the energy central daily electric power new…	0.951822	0.370457	['bitsquatting', 'get_semantic_related1', 'get_synonyms', 'get_semantic_related', 'addition', 'insertion', 'get_semantic_related', 'repetition', 'num_to_word']	[['database', 'databaqe'], ['new', 'new .'], ['maintains', 'maintain'], ['sending', 'hundreds sending'], ['covering', 'coveringz'], ['intranet', 'inytranet'], ['receive', 'obtain receive'], ['seminar', 'sseminar'], ['303', 'three hundred three']]	9	1	2	1	0.981551	0.124511	0.0156889	0.0434968	0.0360288	1277	0.629543	0.00704777
2285	Subject:missing txu lonestar and paradise oasis paths stacey,it looks like your missing paths revealed a quirk in our suppression of zero paths.there were 4 paths initially entered as zero,then changed to non-zero on a later date.the system did not correctly determine that the zero path should no longer be suppressed.we have fixed the 4 paths affected and have corrected the code so this won't hap…	0.945629	0.358643	['get_semantic_related', 'insertion']	[['oasis', 'paradise oasis'], ['thanks', 'tzhanks']]	2	1	2	1	0.878808	0	0.0211765	0	0.0105263	74	0.641357	0.027027
2297	Subject:43-----original message-----from:tcash@aimtech.net[mailto:tcash@aimtech.net]sent:tuesday,february 29,2000 11:22 am to:shane walls cc:kfku@dynegy.com;cashj@kochind.com;maolson.baycity@celanese.com;cash,april;cchsda@lyondell.com;bambam 6901@aol.com;glover,rusty;clay _ carbaugh@acco.com;ahernand@kentelec.com subject:i scored a 41>>>>>>>********************************************************…	0.952728	0.499549	['bitsquatting', 'get_semantic_related1', 'get_semantic_related', 'get_semantic_related1', 'get_semantic_related']	[['question', 'questmon'], ['human', 'human health'], ['insight', 'clues insight'], ['major', 'major part'], ["n't", "know n't"]]	5	1	2	1	0.943298	0.102871	0.017401	0.0223285	0.0311042	418	0.500451	0.0119617
2305	Subject:power market scientific research this piece from deutsche bank is good macro overview of electricity supply/demand fundamentals.a little on the long side-78 pages,but has some good discussion on nerc(north american electric reliability council regions),beginning on page 15.	0.872519	0.394782	['get_semantic_related']	[['research', 'scientific research']]	1	1	2	1	0.833893	0	0.021645	0	0	36	0.605217	0.0277778
2309	Subject:corrected:new update on ppi model for inflation book dear all,i followed up on the suggestions at the conference call as follows:-1)use less data nothing unfortunately,kicking out only 1990 makes the overall equation a lot less robust,in fact dramatically so,and so eliminates the possibility of using less data.the model tested was the rpi(month+15)ppi pre-empts the moves in rpi by about 8…	0.654121	0.339482	['bitsquatting', 'get_semantic_related']	[['forward', 'fkrward'], ['unfortunately', 'nothing unfortunately']]	2	1	2	1	0.951104	0.127098	0.0204856	0.0115894	0.0147541	417	0.660518	0.00479616
2315	Subject:aggie virus as we don't have any syndicated programming experience,and we're not very good at this,this virus works on the honor system.please delete all the files from your hard drive and manuelly forward this virus to everyone on your mailing list.thanks for your cooperation,texas a&m computer engineering dept.	0.992514	0.48752	['bitsquatting', 'get_semantic_related']	[['manually', 'manuelly'], ['programming', 'syndicated programming']]	2	1	2	1	0.715089	0	0.0232558	0	0.0166667	43	0.51248	0.0465116
2325	Subject:phentermine,levitra,soma,ambien phentermine,levitra,soma,ambien clump bernie athwart saline pizza vldyzjmehbvqzjsc rydjgmrpfwhnmxqy e p qlpislguz ihdf ne please stop sending........adoptive clothbound habitat duress topsy mu mqxsshaafbjhptpt nyku auc ppurxc ogpuhpnh typhon inventories lean ecole tug tawdry committed raritan pigtail auditor conqueror barkeep bragg sociable clarence.-----be…	0.999732	0.427826	['get_semantic_related']	[['lean', 'inventories lean']]	1	2	1	2	0.846095	0.980769	0.0711238	0.138614	0.166667	52	0.572174	0.0192308
2332	Subject:your application#623 b 3 d 24*esarn$2000-$5000 weekly-starting within 1-4 weeks*78%profit paid daily*no selling*no risk guarantee*work from home,no overhead,or employees.*high tech training&support*not mlm,100 x more profitable the most incredible part of our business is that all my clients call me!do you qualify for our mentor program?accepting only 12 new associates this is not a hobby!…	0.963696	0.472278	['bitsquatting', 'get_semantic_related', 'addition', 'get_semantic_related', 'omission', 'insertion']	[['email', 'emaih'], ['read', 'i read'], ['reply', 'replyh'], ['supply', 'gas supply'], ['extra', 'extr'], ['earn', 'esarn']]	6	2	1	2	0.937515	0	0.024581	0.00515464	0.039604	133	0.527722	0.0451128
2334	Subject:head&rotor ve 07/26 dear sir,*Ã¶Ã°Ã¢Â·Ã­Â¨Ã¥Ã¤Ã¼Ã¾ Â³Â§Ã³Ã°Â¶Ã Ã¤ÃªÃ©Ãº Â² ÃºveÂ±Ã£Ã­Â·ÂµÃ¤Ã½Â­Ã±Ã©,Ã·Ã·Ã®?Â½ Ã¯Ã´Ã§ Â½ Ã¸Ã¨Ã«Ã³Ã­Â±Ã£Ã³Ã­Ã·Ã¬Ã°Ã° Ã¶ÃªÃ¡Ã¾ÃŸÃ­Ã­Ã¢ÃžÃ»Ã­Â¬ÃžÃºÃ­Ã¢Ã­Â¬Ã€Ã Â² ÃºÃ¦Â·Ã¯Ã ÂµÂ±.*Ã¨Ã§Â¶Ã´Ã®?Ã£Ã§ÂµÃ¤ Â² ÃºÃ¦Â·ÃÃ°Ã°Ã«Ã¨Â¤,Ã§Ã«Ã­Â¨Ã¶?Ã®?Ã£Ã§.we have been in the field of diesel fuel injection systems for quite a few years.(china)we tell you that we will update our …	0.745985	0.022948	['bitsquatting']	[['313', '713']]	1	2	1	2	0.986138	0.171548	0.0182815	0.0961538	0.0952381	239	0.977052	0.0041841
2348	Subject:unify production back-eol deals highlighted the proton machine is up and unify production is now available.for being so patient,path manager will now highlight your eol deals in yellow.thabnks,d.n.	0.843838	0.403425	['insertion']	[['thanks', 'thabnks']]	1	1	2	1	0.8772	0.192308	0.0251256	0	0.027027	26	0.596575	0.0384615
2354	Subject:sql error-real time inc sheets following are the errors i came across while uploading real time inc sheets for this year 2005:feb trading:run-time error'-2147217904(80040 el 0)':procedure'audit _ sp _ delete _ inc _ master _ for _ date'expects parameter'@deal _ date',which was not supplied.mar services:run-time error'13':type mismatch.jun trading:error number 3001:arguments are of the wro…	0.999746	0.471229	['get_semantic_related1']	[['year', 'year 2005']]	1	1	2	1	0.840047	0.163043	0.152174	0.0504202	0	92	0.528771	0.0108696
2374	Subject:start the year off right with free e-cards at greeting-cards.com if this newsletter is incorrectly formatted or is not loading properlq,please gohttp://greeting-cards.com/currentnewsletter greeting-cards.com guest!all of our e-cards are free so futures stock up on as many as you like!winter skyline it's okay if it's taken you a long time to recover from the fun of new year's eve!now that …	0.863537	0.310244	['get_semantic_related', 'get_semantic_related', 'bitsquatting', 'bitsquatting', 'get_synonyms']	[['holiday', 'holidays holiday'], ['stock', 'futures stock'], ['box', 'bo8'], ['properly', 'properlq'], ['secure', 'unassailable']]	5	2	1	2	0.974684	0	0.0126103	0.00542005	0.0156658	264	0.689756	0.0189394
2377	Subject:[eunice meghan]next month...,molly flo jbte wdbn ijm dw vkitb bvel fkr eyre jcthg vvof isd edly fmvkyb urguk lesb ovuwc q srwbk agol gtyc eyea qk vbwau xpq tmtl fmi hxiom uuhux mu cmln	0.99631	0.287435	['get_semantic_related1']	[['eunice', 'eunice meghan']]	1	2	1	2	0.812098	1	1	0.558824	0	32	0.712565	0.03125
2385	Subject:fw:extra prayer request-----original message-----from:celeste gabrielladeo@aolg.com sent:tuesday,april 11,2000 1:21 pm subject:extra prayer request hi,i am coming to you with a very extra prayer request.we have some good friends here in nashville,mark and melanie burress and their one yeab nld babe gracia,who have recently received some devastating worst news.mark was diagnosed in decembe…	0.920505	0.476477	['get_semantic_related1', 'get_synonyms', 'get_semantic_related1', 'bitsquatting', 'get_semantic_related1', 'bitsquatting', 'bitsquatting', 'addition', 'insertion', 'addition', 'get_synonyms']	[['devastating', 'devastating worst'], ['baby', 'babe'], ['marrow', 'marrow transplant'], ['old', 'nld'], ['celeste', 'celeste gabriella'], ['year', 'yeab'], ['gracie', 'gracia'], ['aol', 'aolg'], ['donate', 'don1ate'], ['houston', 'houstonf'], ['special', 'extra']]	11	1	2	1	0.794815	0	0.0247831	0.0104439	0.0227848	301	0.523524	0.0365449
2389	Subject:old and new extensions hello,may i please have several lines disconnected from my phone and several new lines added.you can delete 36336 and 33135.you can delete 33376 and 39719 also 34768.will you please add 36615 and 34305 will you add please jose marquez extension,a new hire.(a new number)also add 39737 and 36286.r.c.100038 co.#0011 thanksu kevin moore any queastions please feel free t…	0.958874	0.251694	['insertion', 'addition']	[['question', 'queastion'], ['thanks', 'thanksu']]	2	1	2	1	0.897111	0.178571	0.196429	0.142857	0	56	0.748306	0.0357143
2399	Subject:bc election results&analysis below is a brief summary of the bc election results and some analysis into the new political party's'implication.as the new bc energy strategy further develops,we will provide a more detailed follow-up reports.executive summary?new democratic party sweeps election?opposition within newly elected party possible?campbell to consider dividing bc energy and mines …	0.805919	0.460346	['get_synonyms', 'get_semantic_related']	[['green', 'K'], ['poor', 'bad poor']]	2	1	2	1	0.971494	0.158602	0.0274621	0.00218818	0.0020284	372	0.539654	0.00537634
2446	Subject:lessons in hara-kiri,latin version mexico-power strike set for march 16 in mexico city some 35,000 members of the mexican union of generator electrical laborer workers plan to strike the mexico city electric company on Fri,march 16 th at 12 noon.the union is demanding a 29 percent salary earn increase and the company is offering nothing.the two sides sides are not even talking.the union i…	0.933778	0.261583	['get_semantic_related', 'get_semantic_related', 'get_semantic_related', 'get_semantic_related1', 'get_synonyms', 'omission', 'get_synonyms']	[['electrical', 'generator electrical'], ['side', 'sides side'], ['worker', 'laborer worker'], ['salary', 'salary earn'], ['rate', 'rank'], ['opposed', 'oposed'], ['friday', 'Fri']]	7	1	2	1	0.905302	0.124138	0.022619	0.00657895	0.00591716	145	0.738417	0.0482759
2447	Subject:looking 4 real fun 211075433222 talk on tele with locals in your area who want to meet for real encounters.no pre recorded bull this is the real deal.us residents:the 965 or 8919.-999+be carefulk when making sexual probably dates and meetings.cali 900#is$1.99 per min 211075433222	0.990575	0.45391	['get_semantic_related', 'addition']	[['date', 'probably date'], ['careful', 'carefulk']]	2	2	1	2	0.827354	0.0952381	0.0138889	0.0566038	0.0740741	42	0.54609	0.047619
2466	Subject:interested in an invitation*this message was transferred with a hearings trial version of communigate(tm)pro*a friend wants you to end your single streak by sending you on an adventure.click lets here to accept the invitation:no thanks	0.976892	0.00222939	['get_semantic_related1', 'get_semantic_related']	[['click', 'click lets'], ['trial', 'hearings trial']]	2	2	1	2	0.767217	0.142857	0.0196078	0	0.0227273	35	0.997771	0.0571429
2473	Subject:anaerobic alden%the cablefilterz will allow you to receive all the channels that you order with your remote control grip,\payperviews,axxxmovies,sport events,special-events _ _ http://www.9005 hosting.com/cable/delta,embroil.	0.99993	0.127541	['get_semantic_related1']	[['control', 'control grip']]	1	2	1	2	0.813406	0.380952	0.0321101	0.0512821	0.075	21	0.872459	0.047619
2490	Subject:invoice for ordered papers you have ordered the following papers:-wp w 7613 foundations of technical analysis:clomputational algorithms,statistical inference,and empirical imple-wp w 6250 pricing and hedging derivative securities in incomplete markets:an e-aritrage model the total cost(excluding shipping waterways)is:$us 10 shipping waterways address:if you ordered papers for eIectronic d…	0.974916	0.371446	['generatehom', 'get_semantic_related1', 'generatehom', 'insertion', 'get_synonyms']	[['implementation', 'imple'], ['shipping', 'shipping waterways'], ['electronic', 'eIectronic'], ['computational', 'clomputational'], ['note', 'bank_note']]	5	1	2	1	0.777906	0	0.0219966	0.02	0.0485437	63	0.628554	0.0793651
2504	Subject:dynegy's letter to san diego gar&electric http://biz.yahoo.com/bw/010413/0033.html	0.925392	0.153964	['bitsquatting']	[['gas', 'gar']]	1	1	2	1	0.625608	0.666667	0.0277778	0.0588235	0.0588235	6	0.846036	0.166667
2509	subject:virgil call the doc.viiiiiiagraaaa only for the ones that want to make her scream.prodigy scrawny crow define upgrade spongy balboa dither moiseyev schumann variegate ponce bernie cox angeles impassive circulate impend miscellany chalkboard whizzing pend armenian cutlet waring makeshift fletch dispel crest cadet dovetail rapprochement gerry bayreuth selectman wilmington tuttle alchemy itt…	0.995465	0.0166406	['get_synonyms']	[['doctor', 'doc']]	1	2	1	2	0.864288	0.320755	0.320755	0.0576923	0.0508475	53	0.983359	0.0188679
2547	Subject:calpine may total 70 nom apr 81 mar 79 feb 85 average of 3:82 does this average represent a good estimate of the calpine may nom?ami	0.630112	0.316263	['get_semantic_related1']	[['total', 'total 70']]	1	1	2	1	0.653872	0.380952	0.0522388	0	0	21	0.683737	0.047619
2549	Subject:contact thoughts i'm smiling sitting here a bit disappointed and pissed.do you and pat honestly believe it is"one man's word against another"on setting up the link builder by the 12 th of the month?if so,why have i been saying something is wrong with some of the links for the last several days?and why did i work so late the first couple of days of each month setting up the links when i ha…	0.950612	0.419007	['get_semantic_related', 'get_synonyms']	[['sitting', 'smiling sitting'], ['meeting', 'contact']]	2	1	2	1	0.759701	0.181102	0.042471	0.00584795	0.00581395	127	0.580993	0.015748
2639	Subject:sammy dj perjure hi sean,here if u adders cant read this o-u-t 1-8 hi musicale filled canine goober spiritual gangplank read counsel allis ferric gam donahue fleshy savoy tideland pleistocene anita minimal recovery salvatore covenant neva sideman aminobenzoic byronic enrico newel decelerate chenille helvetica rebellion paramagnetic scrutiny hearings cornfieldt clove kombu groom	0.850424	0.0602277	['get_semantic_related', 'addition', 'get_semantic_related1']	[['cant', 'adders cant'], ['cornfield', 'cornfieldt'], ['scrutiny', 'scrutiny hearings']]	3	2	1	2	0.892268	0.367347	0.0425	0	0.0344828	49	0.939772	0.0612245
2669	Subject:do you?you have written a very good txt,excellent,good work!	0.995678	0.000216443	['omission']	[['text', 'txt']]	1	2	1	2	0.700262	0.222222	0.0298507	0	0	9	0.999784	0.111111
2676	Subject:[downline member 9018232237]thanks for requesting this information useful push button inreached reached on,why wait join us today http://shaumbra.fxtrainer.biz	0.968812	0.436316	['get_semantic_related1', 'get_synonyms']	[['information', 'information useful'], ['come', 'reached']]	2	2	1	2	0.859781	0.1875	0.0181818	0.130435	0.16	16	0.563684	0.125
2677	Subject:new super loads no more messenger instruments murder which papers.current these responses office these is it also presented prosecution numbered name papers.sir fact often	0.99847	0.00628836	['get_synonyms']	[['mail', 'messenger']]	1	2	1	2	0.862428	0.136364	0.0909091	0	0	22	0.993712	0.0454545
2681	Subject:analysts i am currently in need of 2 analysts for a period of 2-6 months to solve in commercial business analysis roles for me related to eott.	0.965866	0.399182	['get_synonyms']	[['work', 'solve']]	1	1	2	1	0.781353	0.12	0.0135135	0	0.0344828	25	0.600818	0.04
2722	Subject:arrow bennett the c2ablefilterz will allow you to receive all the channels that you order with your remote grip control,payperviews,axxxmovies,sport events,special-events*http://www.9001 hosting.com/c2able/brushy,mummy.	0.999895	0.00630854	['insertion', 'get_semantic_related']	[['cable', 'c2able'], ['control', 'grip control']]	2	2	1	2	0.648822	0	0.0235849	0.025641	0.1	19	0.993691	0.105263
2725	Subject:discussion documents we will have a total of three documents to go over with you.one is an org chcrt which kevin will send,one is a description of each position,the last lists the pros and cons associated with moving retailers into the existing wholesale business.	0.997291	0.0359606	['get_synonyms', 'bitsquatting']	[['retail', 'retailers'], ['chart', 'chcrt']]	2	1	2	1	0.714911	0.0930233	0.0174672	0	0.02	43	0.964039	0.0465116
2728	subject:re:important:prevent stretch marks during pregnancy i tried their incredible new product important message being loaded the cab-buck,who never slept long at a time,sat upon his haunches and watched the tiny piglets and the kitten with much approval don't be rough!he would call need out,if eureka knocked over one of the round,fat piglets with her pa;but the pigs never given,and enjoyed the…	0.964952	0.0127035	['get_semantic_related1', 'get_semantic_related1', 'get_synonyms', 'get_synonyms', 'omission', 'get_synonyms', 'get_synonyms', 'omission']	[['said', "said ''"], ['call', 'call need'], ['horse', 'buck'], ['marking', 'grading'], ['paw', 'pa'], ['face', 'confront'], ['minded', 'given'], ['right', 'righ']]	8	2	1	2	0.808528	0.140351	0.157895	0.00666667	0.00657895	114	0.987296	0.0701754
2746	Subject:roles&responsibilities as discussed:this is for global products europe.i will have an assistant put into a grid format.what do you think about replicating this for other products/office appointments?	0.801344	0.451398	['get_semantic_related1']	[['office', 'office appointment']]	1	1	2	1	0.673744	0.153846	0.0182927	0	0	26	0.548602	0.0384615
2764	Subject:quick cash foreclosure investing secrets unveil asset solutions,2100 llc 16420 se mcgillivary#103-1007 vancouver,wa 98607	0.609167	0.291131	['get_synonyms']	[['revealed', 'unveil']]	1	2	1	2	0.841146	0.461538	0.0304878	0.157895	0.210526	13	0.708869	0.0769231
2789	Subject:re:balance sheet we currently have an epc contract with the city of austin to develop a project using the lm 6000's that we sold to them.this is followed by a 2 year 2005 ppa at a fixed heat rate.it is currently being managed by mike curry.doug gilbert-smith and i are both ready to elevate drew tingleaf to a leadership position in ercot.we both think that his leadership would be valuable …	0.99949	0.0927066	['get_semantic_related1']	[['year', 'year 2005']]	1	1	2	1	0.925103	0.121951	0.109756	0.0114943	0	82	0.907293	0.0121951
2794	Subject:where?95%of home pc's are infectedo by apyware or adware.receive a free scan.learn skills more zagreb carbondale mcginnis contralto perch burgess wyner steely bold deregulatory annihilate bumptious arizona celandine optimism carmen louise receipt mph nuthatch brag clergymen ex dissipate encroach denumerable jostle cordite compression electra leasehold objectify dutchmen dragon leatherneck…	0.681905	0.498233	['addition', 'insertion', 'get_semantic_related', 'addition', 'bitsquatting', 'addition', 'addition', 'insertion', 'get_semantic_related1']	[['infected', 'infectedo'], ['interferometer', 'interferometder'], ['metric', 'grain metric'], ['aggravate', 'aggravateb'], ['pastoral', 'qastoral'], ['nightshirt', 'nightshirtk'], ['bisexual', 'bisexuals'], ['assist', 'assoist'], ['learn', 'learn skills']]	9	2	1	2	0.946539	0	0.0278752	0.0244361	0.0642361	557	0.501767	0.016158
2797	Subject:devilish rosado!the cablefilterz will allow you to receive all the channels that you order with your remote control grip\payperviews,axxxmovies,sport events,special-events?http://www.8002 hosting.com/cable/surmise,seeing that curses	0.999881	0.18508	['get_semantic_related1']	[['control', 'control grip']]	1	2	1	2	0.81584	0.35	0.0263158	0.047619	0.0697674	20	0.81492	0.05
2813	Subject:>>turn$500 into$1200+/day-starting today$$cash in daily$$this is not a lottery or sweepsinvolves!but you'll think so when the"money"starts pouring in this week!.and we're not kidding!i earned$1200 my lst week,so did my sponsor and so did his sponsor and you can too!update:ups delivered me$1200 on my 10 th day$1200 againon my 14 th day...and do you know what...ups brought me$1400 on my 17 …	0.987157	0.226934	['get_synonyms', 'addition', 'insertion', 'get_synonyms']	[['take', 'involve'], ['fresh', 'freshe'], ['888', '8i88'], ['mail', 'messenger']]	4	2	1	2	0.882603	0.22973	0.243243	0.0408163	0	148	0.773066	0.027027
2834	Subject:western update 5/7/01 executive summary?the likely outcome of the 16 may elections is a victory by the bc liberal party(currently holding polls at 70%),a pro-business,right-of-center party led by gordon campbell.?major changes in british columbia petroleum energy policy are likely under a liberal government.?a low snow pack,a return to regulation by the bc utilities commission and public …	0.6203	0.315776	['get_semantic_related']	[['energy', 'petroleum energy']]	1	1	2	1	0.926132	0.116101	0.0172442	0	0.0017452	913	0.684224	0.00109529
2835	Subject:urgent update unreported determinant angelenos vichy crab digital parades borrowing mould clemson casket three americanism yellowed shearing plant pitt bald agamemnon supercomputer utter awe balustrades toughness crowing ambulances kant awake enduring refinery nagasaki fuller--phone:461-935-9871 mobile:629-182-3178 email:geoff steve.ormond 2001@norikomail.com	0.642322	0.0820567	['get_semantic_related', 'get_semantic_related1']	[['awe', 'utter awe'], ['geoff', 'geoff steve']]	2	2	1	2	0.900269	0.444444	0.024948	0.0425532	0.04	27	0.917943	0.0740741
2840	Subject:re:hi me and my friends have this brand new idea,a live webcam clik here this is not spam-you have received this e-mail because at one time or another you entered the weekly draw at one of our portals or ffa sites.we comply with all proposed and current law amendments on commercial e-mail under(bill s.1618 title iii passed by the 105 th congress).if you have received this e-mail in error,…	0.999444	0.216719	['omission', 'get_semantic_related1']	[['click', 'clik'], ['law', 'law amendment']]	2	2	1	2	0.883688	0.0933333	0.0207792	0.010101	0.01	75	0.783281	0.0266667
2841	Subject:diatomaceous jacques the cablefilterz will allow you to receive all the channels that you order with your remote grip control,payperviews,axxxmovies,sport events,special-events';http://www.9004 hosting.com/cable/bebop,centrifugate.	0.99994	0.119243	['get_semantic_related']	[['control', 'grip control']]	1	2	1	2	0.656128	0	0.0327103	0.05	0.121951	19	0.880757	0.0526316
2876	subject:order vi)agra from home-no doc required.	0.999994	0.177648	['get_synonyms']	[['doctor', 'doc']]	1	2	1	2	0.767136	0.333333	0.333333	0	0	6	0.822352	0.166667
2887	Subject:unify down-unix team living working on it the unix server that unify production runs on(proton)went down this morning.the unix team is living working on it.i will let you know as soon as unify is available.d.n.	0.707583	0.322387	['get_semantic_related']	[['working', 'living working']]	1	1	2	1	0.821886	0	0.0204082	0	0	32	0.677613	0.03125
2968	Subject:willd single nudee nymmphets hairlesss stats pussiies this wiild are nudde nymphhets check show theiir boddys yooung beauutiful offer and innoceent.look at tthat first hairlless viirgin they pussiess.speciaal high unique qquality from russsia made in privatte work closeed sttudio.don't tthink to heavily.messenger limmited time oppportunity.particular type legal	0.940177	0.00014168	['get_semantic_related', 'get_synonyms', 'get_synonyms']	[['type', 'particular type'], ['much', 'heavily'], ['mail', 'messenger']]	3	2	1	2	0.927809	0.636364	0.590909	0.234043	0	44	0.999858	0.0681818
2988	Subject:$15117 why hold_off?get the right%r'ate refi first or second lower your cost or raise money http://jjgeft.info/prime/castlline/please confirm within 24 hr hs----system information----in a medium bowl,lightly whisk together the yolks and half of the sugar.in a non-reactive saucepan combine the cream,1 cup of the milk,the remaining sugar,and the salt.split the vanilla bean in half,lengthwis…	0.999948	0.411267	['get_semantic_related1', 'get_synonyms', 'bitsquatting', 'get_synonyms']	[['hr', 'hr h'], ['wait', 'hold_off'], ['tar', 'tav'], ['best', 'right']]	4	2	1	2	0.874602	0.0963855	0.0167224	0.042735	0.0420168	83	0.588733	0.0481928
3020	Subject:ilan servisi art?fffffdk ilan vermek?ffffe 7 ok kolay istedi?fffffoiniz her an,her yerden,istedi?fffffoiniz gazeteye ilan verebilirsiniz www.cagtanitim chris.com	0.977084	0.0027564	['get_semantic_related1']	[['tim', 'tim chris']]	1	2	1	2	0.797151	1.41667	0.103896	0.333333	0.3125	12	0.997244	0.0833333
3026	Subject:updated:interactive open season ready for testing we have moved another change into production where any bid equal to over the max rate will be valued using a 0%throughput commitment.this way,any one part and two part bid over max rate will be evaluated in the same manner.this also me1ans that when a user checks the max rate button,a 0%throughput commitment will be take_for_granted.	0.749649	0.404807	['insertion', 'get_synonyms']	[['mean', 'me1an'], ['assumed', 'take_for_granted']]	2	1	2	1	0.89279	0.0689655	0.0122699	0	0.0135135	58	0.595193	0.0344828
3053	Subject:3.jpg joke of the day a blonde went to the appliance store sale and found a bargain.i would like to buy this tv,she told the salesman.sorry,we don't sell to blondes,he replied.she hurried home and dyed her hair,then came back and again told the salesman,i would like to buy this tv.sorry,we don't sell to blondes,he replied.darn,he recognized me,she thought.she went for a complete disguise …	0.593763	0.476851	['get_semantic_related1']	[['take', 'take should']]	1	2	1	2	0.904559	0.252632	0.0373377	0	0	95	0.523149	0.0105263
3067	Subject:!gorgeous,custom websites-$399 complete!(4156 cumg 9-855 yqkc 5@17)beautiful custom websites,$399 complete!get a beautiful,100%custom web site(or yours redesigned)for only$399!*we have references coast to coastand will give you plenty of sites to view!includes up to 7 pages(you can add more),java rollover buttons,feedback forms,more.it will be constructed to your taste and specifications,…	0.694593	0.0201981	['get_synonyms', 'get_semantic_related1']	[['shared', 'divided'], ['control', 'control grip']]	2	2	1	2	0.837019	0.216667	0.0233863	0.0336134	0.037037	120	0.979802	0.0166667
3082	Subject:caiso notice:rfp for development of transmission project evaluat ion...>market participants:>>the iso has issued an rfp for development of transmission project>evaluation and justification principles and methodology recommendations.>this rfp can be accessed at:>http://wwwl.caiso.com/docs/2081/07/03/.html.>>>thank you.>catalin micsa>grid planning>>us mail:>p.o.box 639014>folsom,ca 95763-90…	0.957116	0.461402	['bitsquatting']	[['2001', '2081']]	1	1	2	1	0.943921	0.388889	0.0261569	0.0909091	0.126582	36	0.538598	0.0277778
3090	Subject:curtains hey!i'v almost got the curtains finished.been so busy,everything's so busy this week.i probably won't get them mailed until mon.'cause i have to borrow a car from someone at work in order to get to the post office in time before it closes in this hick town,&everyone goes home early&don't want to wait around on fri.but i`|1 get them there asap.they won't have buttons,'cause tonya …	0.684431	0.184824	['generatehom']	[["'ll", '`|1']]	1	1	2	1	0.850595	0.153846	0.0231839	0	0	117	0.815176	0.00854701
3093	Subject:move to the rzesearch surface_area hi shalesh:the move team has informed me that they will not be able to move your telephone until wednesday,the 23 rd.i have asked them to bring you boxes by friday,but i have not heard back from them.your computer is here,but without a telehone,you may not want to move down here until the 23 rd.just to let you know.have a great day!shirley	0.983978	0.386865	['insertion', 'get_synonyms']	[['research', 'rzesearch'], ['area', 'surface_area']]	2	1	2	1	0.924311	0.229508	0.0604839	0.0243902	0.0361446	61	0.613135	0.0327869
3105	Subject:hoping for portland:hey there ogre!!:)just teasing!!!well unfortunately i'm still up in the air over the portland thing.it doesn't make it any easier when i know that not only does one of my best won friends reside there but now i have a new lil'buddy!i am so excited about seeing portland and meeting you.you are just as brendan described!i just can't imagine that that big deep voice comes…	0.829131	0.492344	['get_synonyms', 'get_semantic_related1', 'get_synonyms', 'get_semantic_related1', 'generatehom']	[['probably', 'credibly'], ['best', 'best won'], ['setting', 'jell'], ['trying', "trying n't"], ["'ll", '`||']]	5	1	2	1	0.95918	0.161017	0.152542	0.00468019	0.00454545	472	0.507656	0.0105932
3121	Subject:eliminate back taxes forever!ybf irs tax problems?it's time to eliminate your irs tax problems now!let our qualified people help you we can lawsuit settle your back taxes for pennies on the dollar respond now and one of our debt pros will get back to you within 48 hours.click here!if you wish to be removed from future mailings please clicking here.	0.999184	0.173727	['get_semantic_related']	[['settle', 'lawsuit settle']]	1	2	1	2	0.745173	0.08	0.08	0.0151515	0	50	0.826273	0.02
3148	Subject:give away free cd's-earn$5 k in 30 days!this is the bottom line.if you can give away cd's for free to people(like 80-100 in one month)and then let me talk to them for you-if you can give away free product samples-then you can earn$5,000 in the next 30-45 days.think i'm kidding?we earned precisely$26,087.58 in our first 94 days doing just that-and we scanned our checks online for you to se…	0.521698	0.306448	['get_synonyms']	[['removed', 'absent']]	1	2	1	2	0.960018	0.0653846	0.0123648	0.00619195	0.00589971	260	0.693552	0.00384615
3155	Subject:bounce skel@iit.demokritms.gr:non-member submission from[management@demokritms.gr]from paliourg@iit.demokritms.gr thu mar 11 12:30:09 2004n received:from efthimiop _ dd([143.233.247c.228])by iit.demokritms.gr(8.11.6+sun/8.11.6)with smtp id i 2 bau 9 yo 4000 for skel@iit.demokritms.gr;thu,11 mar 2004n 12:30:09+0200(eet)date:thu,11 mar 2004n 12:39:51+0200 to:skel@iit.demokritms.gr subject:e…	0.814462	0.318066	['addition', 'bitsquatting', 'bitsquatting', 'addition']	[['247', '247c'], ['demokritos', 'demokritms'], ['server', 'qerver'], ['2004', '2004n']]	4	2	1	2	0.889173	0	0.0227273	0.0723982	0.114894	94	0.681934	0.0425532
3174	Subject:ad-it's amazing how differently the girls like you when they find out you have a 8"long wanker,thanks to this contraption warnig:this email contains a picture of a man with a massive prick.scroll down if you want to see how to get a massive wiener too.0 it expand your dick now!this method manually lengthens your rod.no bs pills/patches or exercises that don't work!then you might want to l…	0.843373	0.251924	['get_semantic_related1']	[['phoenix', 'phoenix portland']]	1	2	1	2	0.956486	0.210256	0.0362445	0.0679612	0.0798479	390	0.748076	0.0025641
3218	Subject:et&s photo contest-announcing the winners congratulations to the following winners of the 2001q et&s photo contest.over 200 entries were submitted!the winning photos will be displayed in the 2001q et&s public education calendzar.	0.998869	0.334511	['addition', 'insertion']	[['2001', '2001q'], ['calendar', 'calendzar']]	2	1	2	1	0.771625	0.133333	0.016	0	0.075	30	0.665489	0.0666667
3220	Subject:congratulations congratulations on your official designation as a poohbah!just goes to show you,smart guys can finish first also.markk	0.967812	0.171473	['addition']	[['mark', 'markk']]	1	1	2	1	0.829757	0.25	0.0310078	0	0	16	0.828527	0.0625
3226	Subject:dogberry marian|the cablefilterz will allow you to receive all the channels that you order with your remote control grip,:payperviews,axxxmovies,sport events,special-events|http://www.9002 hosting.com/cable/poppy,frank.	0.99992	0.0805493	['get_semantic_related1']	[['control', 'control grip']]	1	2	1	2	0.757847	0.473684	0.034632	0.0769231	0.075	19	0.919451	0.0526316
3230	Subject:goatherd acapulco epistolatory corduroy advisee cambodia allele trinity cambridge faun idiom sick of pil.l.s,we'll here the alternative....perversion rhinoceros informatica crumb flex allegiant adenine blockage lind gary crania enzymology hither graff eocene reach baggy enthalpy bandgap fumigate cardinal antipode moyer glade junky hepatica hope ayers pesticide alienate defeat deprive oliv…	0.686137	0.499573	['get_semantic_related']	[['cambridge', 'trinity cambridge']]	1	2	1	2	0.916619	0.461538	0.043152	0.0175439	0.0163934	52	0.500427	0.0192308
3246	Subject:eol issues to get immediate response on an eol issue,such as a next day signing deal that is not showing up in sitara,either call me at 3-5824 or torrey moorer at 3-6218.if you are unable to reach either one of us,please age us at the following numbers.please pass this information to others in your group.thank you.jennifer de boisblanc dnny 1-877-473-1343 torrey moorer 1-877-473-1344	0.902074	0.301441	['omission', 'get_semantic_related', 'omission']	[['denny', 'dnny'], ['deal', 'signing deal'], ['page', 'age']]	3	1	2	1	0.71462	0.258621	0.044164	0.0384615	0.0365854	58	0.698559	0.0517241
3248	Subject:guaranteed to lose 10-12 lbs in 30 days 11.150 1)fight the risk of cancer!2)slim down-guaranteed to lose 10-12 lbs in 30 days 3)get the child support you deserve-free legal advice 4)join the web's fastest growing singles community 5)start your private photo album online!have a wonderful day,offer manager steve prizemama if you wish to leave this list please use the link below.	0.997521	0.0910076	['get_semantic_related1']	[['manager', 'manager steve']]	1	2	1	2	0.914859	0.0545455	0.0545455	0.0120482	0	55	0.908992	0.0181818
3268	Subject:dear friends and family,i wanted to pass along the unfortunate news that i miscarried earlier today and will have the procedure most likely monday to remove the tissue.i am handling the news well,but ask that you allow me until tuesdyay or wednesday to deal with the situation.of course,i am available,as always,to handle any urgent issues.so,for today,i have ordered myself a huge arrangeme…	0.922821	0.239963	['insertion', 'insertion']	[['thanks', 'thabnks'], ['tuesday', 'tuesdyay']]	2	1	2	1	0.9254	0.183908	0.031068	0	0.0169492	87	0.760037	0.0229885
3271	Subject:this week's woodworking tip...follow-up good afternoon!no,this isn't a new tip-just a follow-up on the one i sent this morning.i received some good responses and wanted to pass a couple of them along.kevin wrote to say that this tip works like a charm,except for one thing:he's had trouble with the router bit not being perfectly centered on the base,so his dadoes have ended up less than pe…	0.862826	0.495998	['insertion']	[['plan', 'pmlan']]	1	1	2	1	0.979333	0	0.0195794	0.00325733	0.0289389	217	0.504002	0.00460829
3291	Subject:labels,key keepers mso-ansi-language:en-us">first of all,excuse us for send this e-messenger for you without yoursolicitation.we are a brazilian company and i am jose teixeira,international sales director.after search in the internet.i found your website.we are a company that produce labels,stickers,key rings,everything made in pvc.also,i would like to invite to take a look in our web sit…	0.999541	0.257105	['get_synonyms']	[['mail', 'messenger']]	1	2	1	2	0.884673	0.223776	0.216783	0.0537634	0	143	0.742895	0.00699301
3300	Subject:maintenance tracking/scheduling cancellations sodtware,$1495 complete maintenance scheduling cancellations and tracking sodtware for any equipment or vehicle,$1,495.00 order by july 31 st and receive two additional user licenses at no charge--a$300.00 value!ez maintenance is a complete sodtware package designed to schedule,manage and track all maintenance and repairs on any type of equipm…	0.967322	0.380813	['get_synonyms', 'addition', 'bitsquatting', 'get_semantic_related1', 'bitsquatting']	[['link', 'data_link'], ['coded', 'codedg'], ['removed', 'remofed'], ['scheduling', 'scheduling cancellations'], ['software', 'sodtware']]	5	2	1	2	0.817064	0	0.0181696	0.00787402	0.032491	210	0.619187	0.0238095
3312	Subject:a money making home business for you...copyright 2002,all rights reserved.your e-messenger address has been verified as one that has requested information on these offers.all e-messenger addresses have been double verified.if this message has come to you in error,please click remove me and your name will be removed from all future messengerings.	0.998788	0.212538	['get_synonyms']	[['mail', 'messenger']]	1	2	1	2	0.737281	0.0392157	0.0392157	0	0	51	0.787462	0.0196078
3323	Subject:drudgery expeditious hi,genierc and sepur viarga(caiils)available onlinez!most trusted onlinez source!cilais or(spuer vagira)takes affect right away lasts 24-36 huors!for suepr vairga tocuh here genierc virgaa costs 60%less!save a lot of$.for vigara tocuh here both products shipped discretely to your door not itnreseted debit desorption abyssinia katherine illusion arch macroprocessor cou…	0.998484	0.116022	['get_semantic_related', 'addition', 'get_semantic_related']	[['thought', "n't thought"], ['online', 'onlinez'], ['atty', 'www.enron.com atty']]	3	2	1	2	0.97689	0.32491	0.029599	0.155488	0.0940439	277	0.883978	0.0108303
3337	Subject:fwd:great news dear applicant,your application was processed and approved.you are eligible for a 2.3%rate and a$400,000 loan.please verify your information here:we look sure forward to hearing from you.regards,tad*sosa senior account manager steve webber financial association	0.999855	0.201467	['get_semantic_related1', 'get_semantic_related1']	[['look', 'look sure'], ['manager', 'manager steve']]	2	2	1	2	0.751035	0.15625	0.15625	0	0	32	0.798533	0.0625
3360	Subject:yummy frappachino hey let's go get coffee again that was really fun.i'm so much more awake now.when will you be back from vegas?sund2ay night right?i'm sure you told me but i have a terrible memory.	0.964348	0.060334	['insertion']	[['sunday', 'sund2ay']]	1	1	2	1	0.908311	0.205882	0.0294118	0	0.0222222	34	0.939666	0.0294118
3383	Subject:never see a doctor again to get the medhcations you want 535 save your money,shop for your m e d s offshore.p 4 plt 883313 fi 68 lltlthis sentance is just taking up spacethe people assembled first,of course!meet scheduled jenny 84897101	0.999532	0.0474063	['get_semantic_related1']	[['meet', 'meet scheduled']]	1	2	1	2	0.807651	0.225	0.0363636	0.104167	0.102041	40	0.952594	0.025
3405	Subject:this is the best tool for promoting your site vprofiles?stands for video profiles,a very simple and easy to use do it yourself wizard tool using the vprofiles wizard tool anyone can simply create their own video commercial,encode and upload it in minutes,the result is a streaming video that's optimized for both modem or high speed bandwidth connections playing directly from your web link …	0.999715	0.45367	['bitsquatting', 'get_semantic_related1', 'omission']	[['2004', '2044'], ['affiliate', 'affiliate minor-league'], ['text', 'txt']]	3	2	1	2	0.971704	0.0811808	0.0142415	0.0216718	0.027439	271	0.54633	0.0110701
3427	Subject:everybody gets paid-no recruiting needed everybody gets paid.no recruiting required.join and reserve a position for free now.program is 18 weeks old and it's paying.everybody gets in line to get paid by all the new people coming in(but it's not a traditional straightline)...everyone makes money...and those that sponsor bill make more....click here to request for more information useful we…	0.997499	0.450639	['get_semantic_related1', 'get_semantic_related1', 'get_synonyms']	[['information', 'information useful'], ['sponsor', 'sponsor bill'], ['opt', 'wahl']]	3	2	1	2	0.875418	0.0273973	0.0046729	0	0	73	0.549361	0.0410959
3433	Subject:free foreign currency newsletter volume over 1.2 trillion dol1ars a day tap into the high-income opportunity found in the world's largest financial market.the foreign currency markets discover how:$20,000"properly positioned"in the euro vs.the us dol1ar,on 12/13/00 could have returned$70,000 on 1/03/01 discover how successful professional traders assisting you can potentially achieve doub…	0.943292	0.461026	['get_synonyms', 'generatehom', 'bitsquatting', 'get_semantic_related', 'get_synonyms']	[['removed', 'absent'], ['dollar', 'dol1ar'], ['receiving', 'raceiving'], ['deciding', 'whatever deciding'], ['learn', 'discover']]	5	2	1	2	0.938607	0.0764331	0.0101476	0	0.0146341	157	0.538974	0.0318471
3471	Subject:get a free prize 6713 cgfsaw 91 cmdaawlolmrlbw 9 rcmlob 3 muz 3 i=his father helps him kill it after he caught it.using the hideholden's personalty.he doesn't accept the rules set before him by phony adults.he wanted two good coonhounds very badlyevery day tom and huck would go and talk to him through the jail cell bars and on occasion bring him food.	0.568958	0.192662	['omission']	[['personality', 'personalty']]	1	2	1	2	0.948389	0.145161	0.0245399	0.057971	0.0857143	62	0.807338	0.016129
3473	Subject:car auto owner alert extended vehicle warranty that exceeds your needs the unfortunate reality of owning a auto is the fact that it will eventually breakdown,so if you have been considering purchasing an extended auto warranty now is the time to do it!we are the vehicle warranty experts the following gift or special this offer was sent to you as a subscriber of direct media.we will contin…	0.980273	0.472156	['bitsquatting', 'insertion', 'get_semantic_related1', 'get_semantic_related1', 'get_synonyms']	[['product', '0roduct'], ['preference', 'prefersence'], ['special', 'special this'], ['car', 'car auto'], ['interest', 'values']]	5	2	1	2	0.923324	0.0405405	0.0405405	0	0.0224719	74	0.527844	0.0675676
3482	Subject:imagine-gasoline 27%cheaper,thorough solstice weigh ingestible fuel-saver-pro this revolutionary device boosts gas mileage 27%+by helping fuel burn better using three patented processes from general motors.take a test drive today-http://www.mrev.biz?axel=63 proven technology a certified u.s.environmental protection agency(epa)laboratory recently completed tests on the new fuel-saver-pro.t…	0.841647	0.259493	['get_semantic_related', 'get_semantic_related']	[['testing', 'genetic testing'], ['news', 'comments news']]	2	2	1	2	0.949244	0.178947	0.0180851	0.0344828	0.0387097	95	0.740507	0.0210526
3525	Subject:updated buyback worksheet please see the attached.the undertake for air company products 122218 has been replaced.jumie	0.994601	0.476445	['bitsquatting', 'get_semantic_related']	[['julie', 'jumie'], ['product', 'company product']]	2	1	2	1	0.660135	0	0.00787402	0.0555556	0.105263	14	0.523555	0.142857
3530	Subject:newsletter,october 04 thailand e hotel.com 1220/64 sathupadit rd.bangklo bangkorlarm bangkok 10120 tel.662-674-8182 to 3 fax.662-212-4696 www.thailandehotel.com e-mail:sale@thailandehotel.com hot package promotion pattaya package ariel cruise 1 days 1 night on boatonly 6,800 baht great fishing activity up to 15 persons bangokok promotion buffet dinner cruise 1 hour and 15 minutes and 2 ho…	0.783465	0.138119	['get_synonyms', 'addition', 'omission', 'insertion', 'get_semantic_related', 'get_synonyms', 'bitsquatting']	[['guide', 'scout'], ['province', 'provincen'], ['refrain', 'refran'], ['1,100', '1,a100'], ['metropolitan', 'conurbation metropolitan'], ['image', 'effigy'], ['2004', '2044']]	7	2	1	2	0.98291	0.144444	0.0187638	0.0267559	0.0397351	450	0.861881	0.0155556
3531	Subject:re:congratulations conditional apprgm oval letter date:8/23/2044 applicsyant:mortxigage brxboker or loaytn employee officer:name:sang talbot license number 628883 v loabsn:amount:up to 565,000 interest rleate:2.785%interest rkh ate lock expires:9/15/2044 maximum louwan-to-value ratio:100%lffoan type and program:ez lock fees:points:0 origination:0 discount:$300 bryboker has received electr…	0.999216	0.0954052	['addition', 'bitsquatting', 'get_semantic_related']	[['change', 'changed'], ['2004', '2044'], ['officer', 'employee officer']]	3	2	1	2	0.911929	0.927835	0.103468	0.408638	0.554878	194	0.904595	0.0154639
3534	subject:teach and grow rich do you want to teach and grow rich?if you are a motivated instigated and qualified communicator,i will personally train you to do 3 20 minutes presentations per day to tournament qualify prospects that i can put_up to you.we will demonstrate to you that you can make$400 a day part time using this system.or,if you have 20 hours per week,as in my case,you can make in exc…	0.938749	0.10306	['get_semantic_related', 'omission', 'get_semantic_related', 'get_synonyms', 'get_semantic_related1', 'get_semantic_related1', 'omission']	[['qualify', 'tournament qualify'], ['9010', '910'], ['state', 'public state'], ['provide', 'put_up'], ['future', 'future how'], ['motivated', 'motivated instigated'], ['right', 'righ']]	7	2	1	2	0.741822	0.080402	0.0904523	0.0124481	0.0121457	199	0.89694	0.0351759
3550	Subject:invitation to present at e-financial worldexpo-september 14&15,2004 invitation to present at e-financial worldexpo-september 14 kharset=windows-1252">dear george paliouras,based on the recommendation from our research analysts,i am sending you this invitation:we would be honored to receive a proposal from you for a unveiling presentation by you at e-financial worldexpo hosted by wowgao on…	0.900756	0.442623	['bitsquatting', 'omission', 'get_semantic_related', 'bitsquatting', 'omission', 'addition']	[['charset', 'kharset'], ['mobile', 'mobie'], ['presentation', 'unveiling presentation'], ['thousand', 'thgusand'], ['session', 'sesion'], ['exposition', 'expositionm']]	6	2	1	2	0.981831	0	0.0293059	0.0356164	0.0678851	253	0.557377	0.0237154
3561	Subject:get that new car 8434 people nowthe weather or climate in any particular environment can change changed and affect what people eat and how much of it they are able to eat.	0.810807	0.116895	['get_semantic_related1']	[['change', 'change changed']]	1	2	1	2	0.899759	0	0.00595238	0.0625	0.0606061	31	0.883105	0.0322581
3562	subject:join the web's hottest&fastest growing community 11.70 1)join the web's hottest&fastest growing community it is so hot!2)guaranteed to lose 10-12 lbs in 30 days slim patch-weight loss patches 3)get the child support you deserve free legal advice have a wonderful day,offer coaching manager	0.998978	0.359611	['get_semantic_related']	[['manager', 'coaching manager']]	1	2	1	2	0.704004	0.117647	0.117647	0	0	34	0.640389	0.0294118
3564	Subject:projected fund giving george-here is one statistical mthod(linear regression),applied to hosanna's fund giving.the mthod is deterministic,where ontributions each sunday are attempted to be explained by significant events on the church's and members'calendars,and the mthod shoudl be considered in contrast to an anecdotal one,where each sunday's giving might be estimated to be the averagel …	0.976385	0.420089	['get_semantic_related1', 'bitsquatting', 'generatehom', 'get_synonyms', 'insertion', 'addition', 'bitsquatting', 'omission', 'omission', 'get_synonyms', 'bitsquatting', 'bitsquatting']	[['january', 'january 2003'], ['christmas', 'christmaq'], ['look', 'Iook'], ['information', 'info'], ['aug', 'ajug'], ['average', 'averagel'], ['year', 'yeab'], ['method', 'mthod'], ['contribution', 'ontribution'], ['special', 'extra'], ['mind', '-ind'], ['june', 'zune']]	12	1	2	1	0.988844	0	0.0291262	0.0575296	0.107744	284	0.579911	0.0422535
3574	Subject:newq website for an exciting conference applications of continis physics in financial analysis 2 liege,belgium 13 to 15 july 2000 the website for this conference is now available at www.eps.org/apfa for further details on all eps conferences link:christine bastian,conferences,governments european continis physical society,34 boulevard rue marc schaffel seguin,bp 2136,f-68060 mulhouse cede…	0.967943	0.450586	['get_semantic_related', 'get_synonyms', 'get_semantic_related', 'addition', 'get_semantic_related1', 'get_semantic_related']	[['european', 'governments european'], ['contact', 'link'], ['rue', 'boulevard rue'], ['new', 'newq'], ['marc', 'marc schaffel'], ['physic', 'continis physic']]	6	1	2	1	0.696273	0.233766	0.0394511	0.038835	0.0517241	77	0.549414	0.0779221
3582	Subject:updated pres3entation i added guadalupe's experience.	0.99893	0.446341	['insertion']	[['presentation', 'pres3entation']]	1	1	2	1	0.655191	0	0.0294118	0	0.125	5	0.553659	0.2
3584	Subject:online credit repair.do it yourself.19186 thank you,your email address was obtained from a purchased list,reference#1320-15000.if you wish to unsubscribe from this list,please click here and enter your name into the remove box.if you have previously unsubscribed and are still receiving this message,you may email our abuse control grip center,or call 1-888-763-2497,or write us at:nospam,64…	0.999855	0.326484	['get_semantic_related1']	[['control', 'control grip']]	1	2	1	2	0.874405	0.181818	0.0194805	0.0337079	0.032967	55	0.673516	0.0181818
3628	Subject:hide your plate from red wore light cameras order confirmation.your order should be shipped by january,viai fedex.your federal express tracking number is xr.thank you for registering.your userid is:%random _ word don't let them take your cash in a flashr its astounding make your licence plate invisible clik here for information go here if you would not like to recei6e futurex mailingqs.	0.973095	0.490373	['addition', 'addition', 'bitsquatting', 'addition', 'omission', 'addition', 'get_semantic_related1']	[['mailing', 'mailingq'], ['via', 'viai'], ['receive', 'recei6e'], ['flash', 'flashr'], ['click', 'clik'], ['future', 'futurex'], ['red', 'red wore']]	7	2	1	2	0.819789	0.145455	0.0317919	0	0.0724638	55	0.509627	0.127273
3681	Subject:internal moves when we move say people between groups-what's the practice with regard to 1)title and 2)salary?is it usual/necessary to make adjustments?it is not in the uk-but i want ca to check.b.	0.721844	0.344958	['get_semantic_related', 'get_semantic_related1']	[['people', 'say people'], ['want', 'want ca']]	2	1	2	1	0.758509	0	0.0125	0	0	30	0.655042	0.0666667
3691	Subject:mondays blues bill,i am having such a terrible day.i am so flustrated.can you believe it is only mondays?ah!anyhow,i hope your day is going much better than mine.when i saw you earlier,you looked kinda angry or something.i hope i was just imaging that.anyhow,i'd better get back to work.i'll talk to you later.	0.716913	0.0494866	['addition']	[['monday', 'mondays']]	1	1	2	1	0.731866	0.26	0.05	0	0	50	0.950513	0.02
3694	Subject:burlington letter here is the alternate consisting language.	0.795489	0.0734842	['get_semantic_related1']	[['alternate', 'alternate consisting']]	1	1	2	1	0.656102	0.285714	0.0188679	0	0	7	0.926516	0.142857
3696	Subject:important notification about your pcs recent internet activity get a pc health check with pc bug doctor!don't think your pc has errors?our research shows that over 94%of all pc's that are over 30 days old have hidden errors that can cause system crashes and data loss.these errors are caused simply by installing or uninstalling softwarex that leaves traces of itself in your computer,this i…	0.509871	0.316877	['addition']	[['software', 'softwarex']]	1	2	1	2	0.947881	0.170306	0.0252427	0.0245399	0.0328358	229	0.683123	0.00436681
3705	Subject:utmost confident from the desk:of.rev.j williams account office n.n.p.c h.q lagos niguria.prvate,email:revwilliams _ nnpc@torba.com replies dear,i am rev.j.williams,an accountant and a member of the project/contract award committee in niguria national petroleum corporation(nnpc).i got to know you and your address from our chamber of commerce and industry directory in my quest for a trustw…	0.747131	0.398991	['get_semantic_related', 'omission', 'bitsquatting', 'omission']	[['dear', 'replies dear'], ['private', 'prvate'], ['nigeria', 'niguria'], ['company', 'compay']]	4	2	1	2	0.990277	0.0897833	0.0150451	0.0217918	0.0307329	323	0.601009	0.0123839
3708	Subject:congratelations!congratelations!on your promotion!	0.961991	0.247104	['bitsquatting']	[['congratulation', 'congratelation']]	1	1	2	1	0.64547	0	0.0333333	0	0.222222	3	0.752896	0.333333
3709	Subject:re:reviesed contact list.note varietys to executive committee contact list.cliff baxter and susan skarness have been removed.esmeralda hinojosa is now dan leff's assistant.noted is her info.marisa rapacioli is now michael brown's assistant.noted is her info.any questions please contact bill dorsey@6-6505.regardless regards,bill.	0.985379	0.430281	['get_synonyms', 'get_semantic_related', 'get_synonyms', 'insertion']	[['information', 'info'], ['regard', 'regardless regard'], ['change', 'variety'], ['revised', 'reviesed']]	4	1	2	1	0.673194	0	0.042623	0.0217391	0.0892857	40	0.569719	0.1
3733	Subject:january-meter 2186 clear lake city gate i have flow without a nom each day at meter 2186 lst=1375 2 nd=28 3 rd=2532 4 th=5952 i assume that this is entex meter.is this volume captured at meter 2004?i will need a nom to support this flow.please advise.thank you.	0.998717	0.0520394	['bitsquatting']	[['2000', '2004']]	1	1	2	1	0.91844	0.292683	0.0423077	0.0172414	0.0172414	41	0.947961	0.0243902
3821	Subject:disappointed with your money taxpayer manager?fees too high?has your mutual exchanges fund or money taxpayer manager failed to deliver the results you expected scheduled?efficient market portfolios are the low cost alternative!free customizedi asset allocation recommendation.professionally managed accounts using low cost,tax efficient exchange traded funds(etf's)for more information click…	0.998291	0.464932	['get_semantic_related1', 'bitsquatting', 'get_semantic_related1', 'addition', 'get_semantic_related1']	[['mutual', 'mutual exchanges'], ['advisor', 'qdvisor'], ['money', 'money taxpayer'], ['customized', 'customizedi'], ['expected', 'expected scheduled']]	5	2	1	2	0.825322	0	0.015411	0.0210526	0.0392157	69	0.535068	0.0724638
3842	Subject:ad hoc timeline review team mark-the ad hoc team's product is attached.it is a suggested revision to the nerc a 3 al time table for the wscc.some basic points are:*elimination of manua1Iy specifyting the wscc pre-schedule flag.the table provides rules for the e-tag software to automatically specify the flag.*the minority majority of our efforts were focussed on creating an incentive mecha…	0.987391	0.479069	['get_semantic_related', 'addition', 'get_semantic_related', 'get_semantic_related1', 'get_semantic_related1', 'generatehom', 'get_semantic_related', 'get_synonyms']	[['majority', 'minority majority'], ['pay', 'payu'], ['close', 'though close'], ['become', 'become most'], ['scheduling', 'scheduling cancellations'], ['manually', 'manua1Iy'], ['agreed', 'urged agreed'], ['set', 'specify']]	8	1	2	1	0.980484	0	0.015047	0.00657174	0.0140237	706	0.520931	0.0113314
3904	Subject:100 lazy people wanted!ilob we are desperately looking for 100 lazy people who wish to make lots of money without working.we are not looking for people who are self-motivated.we are not looking for people who join every'get rich quick'scheme offered on the internet.we are not looking for class presidents,beautiful people,career builders or even college graduates.we don't even want union w…	0.953369	0.0171468	['get_semantic_related', 'get_semantic_related1']	[['way', 'well way'], ['meet', 'meet scheduled']]	2	2	1	2	0.965648	0.0612745	0.011994	0.0153846	0.0150943	408	0.982853	0.00490196
3915	Subject:march ny real options conference please find attached the final program for an exciting conference on"real options valuation in the new economy:internet/e-commerce,r&d/pharmaceuticals,energy."the conference,organised in new york city march 13-15 by the real options group and co-sponsored by ernst&young llp,is addressed to a corporate audience.the chairman of the conference is prof.michael…	0.934842	0.433638	['get_semantic_related1', 'get_semantic_related', 'get_semantic_related1']	[['pdf', 'pdf adobe'], ['interested', 'besides interested'], ['february', 'february 2004']]	3	1	2	1	0.949993	0.177083	0.0224949	0.025641	0.0313589	192	0.566362	0.015625
3922	Subject:multiply your customer base!dear ricardol,cost effective direct email advertising promote your business for as low as$50 per 1 million email addresses simplify your marketing dollars!complete and fax this information form to 309-407-7378.a consultant will contact you to discuss your marketing needs.website:(not required)_ _ _ _ _ _ _ _ _ _ _ _ _ _ _ _ _ _ _ _ _ _ _ _ _ _ _ _ _ _ _ _ _ _ _…	0.602909	0.00939272	['get_synonyms']	[['maximize', 'simplify']]	1	2	1	2	0.918183	0.0594059	0.049505	0.0266667	0	101	0.990607	0.00990099
3955	Subject:model for insurance against cruel oil down side risk fred,i have finished a model we talked about a few days ago.the option we try get to price is a software digital on on an asian strip.if the average price of the prompt month crude oil in a specified time window falls below the strike price,the option pays a lump sum of money secified by the"software digital payout"in the model.as a com…	0.975335	0.302742	['get_semantic_related1', 'bitsquatting', 'get_semantic_related']	[['try', 'try get'], ['question', 'qumstion'], ['digital', 'software digital']]	3	1	2	1	0.845346	0.166667	0.0292887	0.02	0.0288462	84	0.697258	0.0357143
3965	Subject:nasa weather news la nina dissipates but effects linger el nino and la nina,the terrible twins blamed for destructive weather patterns worldwide for the last three or four years,have finally dissipated.however,their impact on the weather will likely continue for some time to come,according to nasa scientists,based on the latest satellite data gathered this month over the pacific.while pac…	0.612257	0.210053	['get_semantic_related']	[['persistent', 'chronic persistent']]	1	1	2	1	0.915428	0.172414	0.0231788	0	0	87	0.789947	0.0114943
3993	Subject:christmas wood tree farm pictures	0.75881	0.395706	['get_semantic_related']	[['tree', 'wood tree']]	1	1	2	1	0.664004	0.4	0.0196078	0	0	5	0.604294	0.2
4016	Subject:new power plant operational on pnm new power plant added to pnm system pnm,public service company of new mexico,now has an additional 132 megawatts of electricity available to help meet peak summer demand.a new gar-fired generating plant,delta-person station,is now fu||y operational in albuquerque,pnm announced this week.-(pr newswire,length=651 words)	0.990364	0.401354	['generatehom', 'bitsquatting']	[['fully', 'fu||y'], ['gas', 'gar']]	2	1	2	1	0.919203	0.295455	0.0289532	0	0	44	0.598646	0.0454545
4023	Subject:feel the need to succeed one's own successful business.court awards processor.your office and be anywhere.flex hours.many earning 5,000 us to 12,000 us per mo.excellent training and support.more information here,or to un-subscribe or to see our address.while considering this suggestion rob remembered how at one time five pirates had clung to his left leg and been carried some distance thr…	0.999938	0.4939	['get_semantic_related1']	[['meet', 'meet scheduled']]	1	2	1	2	0.949493	0.109195	0.020979	0.0181818	0.0135135	174	0.5061	0.00574713

## Sheet: Sample_Twitter
original_id	adversarial	oldscore	newscore	actions	changedict	numberofperturbedwords	previousoutput	newoutput	originallabel	semanticscore	beforegrammarerrors	aftergrammarerrors	beforespellingerrors	afterspellingerrors	Wordlen	SuccessRate	Perturb
6	"allowing a corrupt justice system & racist police force to investigate itself will never serve or ensure protect people." - yo-g	0.980484	0.19441	['get_semantic_related']	[['protect', 'ensure protect']]	1	2	0	2	0.884604	0.190476	0.190476	0	0	21	0.80559	0.047619
7	RT @tlcprincess: Sweet Child O' Mine I brought later you into this orld I can take going you out. #MomSongs @midnight	0.984279	0.497988	['get_semantic_related1', 'omission', 'get_semantic_related1']	[['take', 'take going'], ['world', 'orld'], ['brought', 'brought later']]	3	2	0	2	0.816822	0.333333	0.0543478	0.166667	0.173913	21	0.502012	0.142857
12	#IAmNotThePresidentBecause even @BarackObama isn't so good enough	0.633153	0.0227243	['get_semantic_related1']	[["n't", "n't so"]]	1	2	0	2	0.819669	0.285714	0.031746	0.285714	0.173913	7	0.977276	0.142857
14	pennsylvania families win $4.2 million damages in fracking lawsuit #medium	0.99985	0.101277	['get_synonyms']	[['environment', 'medium']]	1	2	0	2	0.835326	0.2	0.2	0	0	10	0.898723	0.1
22	25. If she got natural hair stick with her that's a loyal ass bitch, you can't trust perm haired Twitter I'm state you	0.999822	0.0764767	['get_synonyms']	[['telling', 'state']]	1	1	1	1	0.837843	0	0.0173913	0	0	23	0.923523	0.0434783
23	panama canal opens $5b locks, bullish despite shipping woes #business marketing	0.997	0.144	['get_semantic_related']	[['business', 'business marketing']]	1	2	0	2	0.73762	0.181818	0.181818	0	0	11	0.856	0.0909091
25	all anti-white thought and action are taught and committed under cover of plausible deniability. #maga #trumptrain #lnyhbt #goo #tcot	0.999	0.174	['get_syntactic_related']	[['gop', 'goo']]	1	2	1	2	0.731925	0.315789	0.263158	0.1	0.1	19	0.826	0.0526316
30	EU acquires action against China at WTO over raw materials #business	0.534948	0.439557	['get_synonyms']	[['take', 'acquire']]	1	2	0	2	0.783045	0	0.0153846	0	0	11	0.560443	0.0909091
36	supreme court rejects nj employees' appeal over pension fund #industry #new3	0.999597	0.116543	['bitsquatting', 'get_synonyms']	[['news', 'new3'], ['business', 'industry']]	2	2	0	2	0.728785	0.272727	0.272727	0.1	0.0833333	11	0.883457	0.181818
42	@carrieffisher That instant with Luke and Rey is central to the entire Star Wars saga. I bet money George could not have forseen that. Maybe he did	0.771441	0.329158	['get_semantic_related1', 'get_synonyms']	[['bet', 'bet money'], ['moment', 'instant']]	2	1	1	1	0.770302	0.333333	0.0325203	0.0384615	0.037037	27	0.670842	0.0740741
43	microsoft cuts more jobs in troubled mobile unit #business industry	1	0	['get_semantic_related']	[['business', 'business industry']]	1	2	0	2	0.818721	0.2	0.2	0	0	10	1	0.1
50	#Debates #ClintonCrimeWave #Trade #Jobs #Immigration Who is most responsible for inner metropolitan metropolis poverty, unemployment, crime & drug crack heroins?	0.994548	0.22294	['get_semantic_related']	[['city', 'area city']]	1	2	0	2	1	0.05	0.05	0.0526316	0	20	0.77706	0.05
56	The more you care, the more you have to going lose.	0.736391	0.000251435	['get_semantic_related']	[['lose', 'going lose']]	1	2	0	2	0.832883	0.0909091	0	0	0	11	0.999749	0.0909091
57	let's do the things that we state on text messages	0.999421	0.146745	['get_semantic_related1', 'get_synonyms']	[['text', 'text messages'], ['say', 'state']]	2	1	1	1	0.609593	0	0.0322581	0	0	10	0.853255	0.2
58	#sanjose prince plays oakland's paramount theater this weekend	0.998497	0.0376336	['get_synonyms']	[['theatre', 'theater']]	1	2	0	2	0.91892	0.375	0.25	0.111111	0.111111	8	0.962366	0.125
59	#RejectedLegoMinifigures The hashtag kawilleyaol.com community	0.899655	3.63e-07	['get_semantic_related1']	[['hashtag', 'hashtag kawilleyaol.com']]	1	2	0	2	0.66071	0	0.0392157	0.25	0.173913	5	1	0.2
60	@staley_dale Hey, will you join continue our grow growing Bernie Support group and post your t-37 tweet also at http://zpr.io/yMTsÂ ?	0.999994	0.29125	['get_semantic_related1', 'get_semantic_related', 'get_semantic_related']	[['join', 'join continue'], ['growing', 'grow growing'], ['tweet', 't-37 tweet']]	3	1	1	1	0.820016	0	0.021978	0.0869565	0.0740741	20	0.70875	0.15
68	"The Gov is committed to bring about transparency in medical education welfare and remove malpractices"Pls dont nâ€™t forget IT bring #NEET 2026 @JPNadda	0.996386	0.0711242	['get_semantic_related1', 'get_semantic_related1']	[['education', 'education welfare'], ['dont', 'dont nâ€™t']]	2	1	1	1	0.90058	0	0.0387097	0.0416667	0.037037	23	0.928876	0.0869565
69	scott walker's administration drops plan to shift family care to for-profit insurers #socially	0.999987	0.0472758	['get_synonyms']	[['politics', 'socially']]	1	2	0	2	0.768613	0.153846	0.153846	0	0	13	0.952724	0.0769231
70	#news Motorcycle crash leaves Ft. Riley soldier perfectly	0.998334	0.377544	['get_synonyms']	[['dead', 'perfectly']]	1	2	0	2	0.716493	0	0	0	0	8	0.622456	0.125
73	headed back to working	0.999957	0.102827	['get_synonyms']	[['work', 'working']]	1	1	2	1	0.730359	0.25	0.25	0	0	4	0.897173	0.25
79	RT @TeriGRight: MT @JosephEach: #CruzCrew going knows #TedCruz has staunchly defended their principles	0.983561	0.0683219	['get_semantic_related']	[['know', 'going know']]	1	2	0	2	0.8327	0.384615	0.0373832	0.333333	0.173913	13	0.931678	0.0769231
83	which one of the following qb's has the best chance of winning super bowl li? #tonyromo #carsonpalmer #alexsmith #jaycutler #charles philiprivers	0.979	0.312	['get_semantic_related']	[['philip', 'charles philip']]	1	1	1	1	0.800067	0.5625	0.625	0.227273	0.217391	16	0.688	0.0625
85	weight gain, heartburn, permanent fatigue, kitchen a mess. i love it #Dec_25aftermath	0.996807	0.0091875	['get_synonyms']	[['christmas', 'Dec_25']]	1	2	0	2	0.828083	0.333333	0.25	0.0666667	0.0625	12	0.990813	0.0833333
106	#politics Fox News suspend 2 commentators for profanity	0.582707	0.246679	['get_semantic_related']	[['fox', 'cnn fox']]	1	2	0	2	1	0.125	0	0	0	8	0.753321	0.125
113	fewer americans signed contracts to buyers buy homes in september #tidings	1	0.394	['get_synonyms', 'get_semantic_related']	[['news', 'tidings'], ['buy', 'buyers buy']]	2	2	1	2	0.779548	0.363636	0.363636	0	0	11	0.606	0.181818
117	i'm a real moody ass girl. can't even handle with myself.	0.969583	0.00775142	['get_synonyms']	[['deal', 'handle']]	1	1	1	1	0.816597	0.181818	0.181818	0	0	11	0.992249	0.0909091
118	Your d2aily reminder that normalizing Trump going means normalizing presidential raxcism, misogyny, deceit, corruption, hatred of available free press associated & more.	0.99976	0.026653	['get_semantic_related', 'insertion', 'insertion', 'get_semantic_related1', 'get_semantic_related']	[['free', 'available free'], ['racism', 'raxcism'], ['daily', 'd2aily'], ['press', 'press associated'], ['mean', 'going mean']]	5	2	0	2	0.834574	0	0.00636943	0	0.08	22	0.973347	0.227273
121	cowboys top forbes most valuable nfl teams list #sport competes	0.977	0.002	['get_semantic_related']	[['sport', 'sport compete']]	1	2	1	2	0.766363	0.4	0.4	0	0	10	0.998	0.1
129	I had tried 2 whip in the car driver and I smashed my head against the window smh if I get a concussion from whipping I'm wonna drink_down myself	0.998823	0.302262	['bitsquatting']	[['gon', 'won']]	1	1	1	1	1	0.241379	0.137931	0	0	29	0.697738	0.0344828
134	game blog: cardinals get walk-off w, and good very news on holliday #stlois	1	0.02	['get_semantic_related', 'omission']	[['good', 'good very'], ['stlouis', 'stlois']]	2	2	1	2	0.696058	0.307692	0.307692	0	0.0666667	13	0.98	0.153846
148	Ugly in pictures Ugly in 2eal life Ugly toweekend day Ugly tomorrow Ugly 36 weekend days	0.984308	0.351623	['get_semantic_related', 'bitsquatting', 'omission']	[['day', 'weekend day'], ['real', '2eal'], ['365', '36']]	3	1	1	1	0.691107	0.0625	0.0625	0	0.125	16	0.648378	0.1875
155	He is stuck defending his failed policies, even his own parTMMy ruling won't support strong him. #ObamaLameDuck #GoBuyWordsOniTunes	0.994868	0.280502	['insertion']	[['party', 'paerty']]	1	2	0	2	1	0.166667	0.166667	0.111111	0	18	0.719498	0.0555556
163	wishing that i could say this words	1	0.088	['get_synonyms']	[['wish', 'wishing']]	1	1	2	1	0.668144	0.285714	0.285714	0	0	7	0.912	0.142857
167	Have u which called @MayorOfLA today &amp; told him to #FireBeck for leading most corrupt and murderous officer police departments department in the nation poorestk. 023-978-07600	0.959523	0.39501	['insertion']	[['0600', '07600']]	1	2	0	2	0.897623	0.153846	0.153846	0.0833333	0	26	0.60499	0.0384615
175	returning home is a mixed blessing for victims of boko haram #political	0.999856	0.335212	['get_synonyms']	[['politics', 'political']]	1	2	0	2	0.893258	0.333333	0.333333	0	0	12	0.664788	0.0833333
177	HillaryClinton Disavow Anifta, KKK &A; your hate anyone groups causing the violence.	0.989653	0.195024	['get_synonyms', 'get_semantic_related1']	[['amp', 'A'], ['hate', 'hate anyone']]	2	2	0	2	0.844427	0.333333	0.0315789	0.166667	0.153846	12	0.804976	0.166667
183	Ready to get my next new fender telecaster tele in the mail messaging postal #twang	0.831342	0.394876	['get_semantic_related', 'get_semantic_related1']	[['new', 'next new'], ['mail', 'mail messaging']]	2	1	1	1	0.86999	0.133333	0.0666667	0	0	15	0.605124	0.133333
187	act of war against #russia #4urkeyaggressor	0.998	0.099	['bitsquatting']	[['turkey', '4urkey']]	1	2	1	2	0.684267	0.666667	0.5	0.166667	0.166667	6	0.901	0.166667
190	gas problem leaves homes cold in blairsville #locale	1	0.039	['get_synonyms']	[['local', 'locale']]	1	2	0	2	0.898344	0.375	0.375	0	0	8	0.961	0.125
195	RT RogerJStoneJr: Well well- the very Ukrainians who colluded with Hillary's effort provided missile tech to North Korean's	0.69271	0.404652	['get_synonyms']	[['campaign', 'effort']]	1	2	0	2	0.809874	0	0.0145985	0.05	0.05	18	0.595348	0.0555556
196	#sports Sebastian Coe is next new first IAAF master	0.999967	0.386228	['omission']	[['chief', 'chie']]	1	2	0	2	1	0.333333	0.222222	0	0	9	0.613772	0.111111
210	vanderbilt gang-rape defense points to campus culture #tidings	0.997	0.075	['get_synonyms']	[['news', 'tidings']]	1	2	1	2	0.894071	0.25	0.25	0	0	8	0.925	0.125
225	never stop continue showing someone how much theÒ¯ mean to Ò¯ou.	0.969787	0.090881	['get_semantic_related1']	[['stop', 'stop continue']]	1	1	1	1	0.730981	0.272727	0.272727	0	0	11	0.909119	0.0909091
240	Trump won't stop going watching SNL because "who knows how long it will be on. It's terrible." LOL. Lovable goofball.	0.905097	0.0623172	['get_semantic_related']	[['watching', 'going watching']]	1	2	0	2	0.92493	0	0.019802	0	0	20	0.937683	0.05
251	Yale campuses student college colleges wsear outfits black to suport campuses student college colleges at University of Missouri	0.972109	0.177503	['get_semantic_related1']	[['student', 'student college']]	1	2	0	2	0.861368	0.111111	0.111111	0	0	18	0.822497	0.0555556
253	Morgan Freeman endorses opposes Clinton #entertainment	0.60529	0.00193517	['get_semantic_related1']	[['endorses', 'endorses opposes']]	1	2	0	2	0.717761	0	0.0163934	0	0	6	0.998065	0.166667
256	One of the best parts of summer starting is getting to wake up next to my dog breed 've every morning midnight	0.999824	0.479065	['get_semantic_related1', 'get_semantic_related1', 'get_semantic_related1', 'get_semantic_related']	[['morning', 'morning midnight'], ['dog', 'dog breed'], ['summer', 'summer starting'], ['every', "'ve every"]]	4	1	1	1	0.822474	0.0454545	0	0	0	22	0.520935	0.181818
261	I think you are right put...	0.98019	0.102215	['get_semantic_related1']	[['right', 'right put']]	1	1	1	1	0.600271	0	0	0	0	6	0.897785	0.166667
264	giant eagle shutting down good cents stores #internally	0.999974	0.0335143	['get_synonyms']	[['local', 'internally']]	1	2	0	2	0.780362	0.25	0.25	0	0	8	0.966486	0.125
265	@daz_barker @McSqueak20 @lunaperla Congrats ! You all rock 'n'!	0.629909	0.000287417	['get_semantic_related1']	[['rock', "rock 'n'"]]	1	1	1	1	0.716441	0	0.0294118	0.2	0.153846	9	0.999713	0.111111
266	Burkina chairman do says back in charge responsible as coup apparently end just years #news	0.999977	0.350206	['get_semantic_related', 'get_semantic_related1']	[['president', 'former president'], ['end', 'end just']]	2	2	0	2	0.902163	0.133333	0.133333	0	0	15	0.649794	0.133333
278	80-year-old tokyo fish market holds final new up year auction #new ups	0.999	0.093	['get_semantic_related']	[['new', 'new up']]	1	2	1	2	0.700156	0.166667	0.166667	0	0	12	0.907	0.0833333
279	#sports FSU picked to finish second, Miami another third in ACC divisions	0.849858	0.136287	['get_semantic_related']	[['third', 'another third']]	1	2	0	2	0.916024	0.25	0	0	0	12	0.863713	0.0833333
282	#tech Expert pane|: Mammograms are most worth spend it for women 50-69	0.910849	0.239713	['generatehom', 'get_semantic_related1']	[['panel', 'pane|'], ['worth', 'worth spend']]	2	2	0	2	0.818887	0	0.0172414	0	0	12	0.760287	0.166667
283	You can either going keep your Head in the game or Just Pull Out #GameShowHostPickUpLines	0.924658	0.0821522	['get_semantic_related']	[['keep', 'going keep']]	1	2	0	2	0.809139	0	0.0405405	0.0714286	0.0666667	15	0.917848	0.0666667
285	data breach sets off charges of theft in '26 democratic race #socially	0.999989	0.154528	['get_synonyms']	[['politics', 'socially']]	1	2	0	2	0.701952	0.166667	0.166667	0.0909091	0.0833333	12	0.845472	0.0833333
286	theory is a handle load of shite	0.970358	0.00214402	['get_semantic_related']	[['load', 'handle load']]	1	1	1	1	0.788246	0.285714	0.285714	0	0	7	0.997856	0.142857
298	The stats prove that we should not be allowing these #IllegalInvaders occupy our territory. Say no to Muslim migrationa into US!	0.999848	0.0127933	['get_semantic_related1']	[['muslim', 'muslim mosques']]	1	2	0	2	0.999655	0.238095	0.0952381	0.0454545	0	21	0.987207	0.047619
314	japan student group injects new first exuberance into anti-war protests #new firsts	1	0.336	['get_semantic_related']	[['new', 'new first']]	1	2	1	2	0.738915	0.166667	0.166667	0	0	12	0.664	0.0833333
331	@CrisMovieCorner No sudden surprises. #ClearWinner	0.558985	0.00722679	['get_semantic_related']	[['surprise', 'sudden surprise']]	1	1	1	1	0.653704	0.4	0.0344828	0.5	0.173913	5	0.992773	0.2
344	sooooo... marco rubio going straight to super nationalist america exceptionalism bullshit... #operate	1	0	['get_syntactic_related']	[['gopdebate', 'operate']]	1	2	0	2	0.800547	0.416667	0.333333	0.0833333	0	12	1	0.0833333
348	Have you spent ago evening hours creating environment fandom doodles? Share them with us, with the hashtag #FandomArt.	0.799445	0.474511	['get_semantic_related1', 'get_semantic_related1', 'get_semantic_related']	[['creating', 'creating environment'], ['spent', 'spent ago'], ['hour', 'evening hour']]	3	1	1	1	0.793833	0	0.0121951	0.0588235	0.05	18	0.525489	0.166667
354	vikings 20, bears 0: the chicago bears are battling to sustenance their faint playoff hopes alive on sunday as they take on the min... #sport	0.999678	0.102505	['get_synonyms']	[['keep', 'sustenance']]	1	2	0	2	0.830903	0.16	0.16	0	0	25	0.897495	0.04
363	Jess and i gets gotta take a day weekend trip to Chicago conna be lit	0.997728	0.253488	['get_semantic_related', 'bitsquatting', 'get_semantic_related']	[['got', 'gets got'], ['gon', 'con'], ['trip', 'weekend trip']]	3	1	1	1	0.876931	0.266667	0.031746	0	0.173913	15	0.746512	0.2
365	Middle eastern men buy 60 cell phones from Walmart at 3 AM in the rural Missouri BTW they're really Muslim, move along nothing to see here	0.536198	0.43837	['get_semantic_related1']	[["'re", "'re really"]]	1	2	0	2	0.928623	0	0.00813008	0	0	26	0.56163	0.0384615
367	If you'e not his only one, he's not the one.	0.733291	0.160696	['omission']	[["'re", "'e"]]	1	1	1	1	0.817363	0	0	0	0	10	0.839304	0.1
368	@kerrywashington I love you! Have a great break broken!	0.633653	0.000410269	['get_semantic_related1']	[['break', 'break broken']]	1	1	1	1	0.632143	0	0.0204082	0.1	0.0909091	9	0.99959	0.111111
372	The scheduled thursday #healthcare bi|1 vote has been postponed, instead there'll be a gathering conferences conference meeting of @GOP House member memberships to discuss next step process.	0.93269	0.0139904	['bitsquatting']	[['bill', 'bihl']]	1	2	0	2	0.999512	0.0740741	0.0740741	0	0	27	0.98601	0.037037
377	TY folks and keep up the great works!	0.999163	0.375228	['addition']	[['work', 'works']]	1	1	1	1	0.69528	0	0	0	0	8	0.624772	0.125
383	Slovenia asks for EU police help to regulate migrant f|ow #news	0.999993	0.261811	['generatehom']	[['flow', 'f|ow']]	1	2	0	2	0.704802	0	0.012987	0	0	11	0.738189	0.0909091
399	#songshannibalwouldsing straight outta prison a crazy mutha f'er named another hannibal	0.986472	0.0211519	['get_semantic_related1']	[['named', 'named another']]	1	2	0	2	0.724577	0.454545	0.454545	0.1	0.0909091	11	0.978848	0.0909091
407	okay sure whose dog and what kind? Sorry, not at all related to the finale.... but.. dogs...	0.590584	0.451474	['get_semantic_related1']	[['okay', 'okay sure']]	1	1	1	1	0.703789	0	0.05	0	0	17	0.548526	0.0588235
460	#breaking Lightning top Blackhawks 4-3 in Game 2 to even series spin-off 2-2	0.782504	0.181842	['get_semantic_related1']	[['series', 'series spin-off']]	1	2	0	2	0.718684	0.0769231	0	0	0	13	0.818158	0.0769231
463	imma delete her immediately	0.999966	0.0293963	['get_synonyms']	[['soon', 'immediately']]	1	1	1	1	0.740831	0.25	0.25	0	0	4	0.970604	0.25
470	went to a bars w @tweeting_witch & had to speak write "so sorry am, never take let know us back in" on the receipt paperwork @ the end of the midnight nights	0.999786	0.291301	['get_semantic_related1']	[['let', 'let know']]	1	1	1	1	0.816239	0.125	0.15625	0	0	32	0.708699	0.03125
471	#politics Seattle police tweak tactics as shootings rise 24-hour citywide	0.965545	0.0279699	['get_semantic_related']	[['citywide', '24-hour citywide']]	1	2	0	2	0.800588	0	0	0	0	10	0.97203	0.1
479	It's from Back to the Future II, but I don'4 catch the context	0.999753	0.192616	['bitsquatting']	[["n't", "n'4"]]	1	1	1	1	0.72142	0	0.027027	0	0	13	0.807384	0.0769231
483	#LesserKnownRoadTripGames Do you want me to turn this car around You &amp; siblings take bet loses on how many numerous times dad threatens to turn around	0.632791	0.133826	['get_semantic_related1']	[['many', 'many numerous']]	1	2	0	2	0.916465	0.115385	0.0769231	0.0416667	0	26	0.866174	0.0384615
500	deutsche bank opens digital factory, hires 400 specialists #engineers	1	0	['get_synonyms']	[['tech', 'engineers']]	1	2	0	2	0.726758	0.222222	0.222222	0	0	9	1	0.111111
501	how is it possible the most disingenuous attacks on sanders came not only after he lost, but after the elections	1	0	['get_synonyms']	[['election', 'elections']]	1	2	0	2	0.941412	0.05	0.05	0	0	20	1	0.05
514	happy birthday celebrating @jiggyki_	0.999905	0.33298	['get_semantic_related1']	[['birthday', 'birthday celebrating']]	1	1	1	1	0.765727	0.75	0.75	0.333333	0.25	4	0.66702	0.25
525	do you like gift cards or is it a shopping cop out? los angeles times explores trend #new	0.998	0.108	['omission']	[['news', 'new']]	1	2	1	2	0.826752	0.222222	0.222222	0	0	18	0.892	0.0555556
528	"THE SAAAAAAVVVVAAAAAGGGEE!" -@Austin__Garner at prom proms	0.993592	0.000646615	['get_semantic_related1']	[['prom', 'prom proms']]	1	1	1	1	0.72713	0	0.0816327	0.111111	0.1	6	0.999353	0.166667
540	#TopNews Nancy Reagan always remembered at funeral for fierce loyalty to husband	0.938656	0.180886	['get_semantic_related']	[['remembered', 'always remembered']]	1	2	0	2	0.809278	0.25	0.0833333	0.0909091	0.0833333	12	0.819114	0.0833333
552	Top 50 U.S. companies hold $2.4 trillion in cashx offshore #money	0.956	0.38956	['addition']	[['cash', 'cashx']]	1	2	0	2	0.769498	0	0.0298507	0	0.0769231	11	0.61044	0.0909091
557	driver accused of owi in sideswipe of rock singer county deputy's car #cr8ime	1	0.231	['insertion', 'get_semantic_related']	[['crime', 'cr8ime'], ['rock', 'rock singer']]	2	2	1	2	0.602754	0.230769	0.230769	0	0.0714286	13	0.769	0.153846
564	Aur haan..do come here sometime. Bht pleasant climate h with lot gets of greenary & waterfalls. Milkar mze karenge	0.912113	0.125023	['get_semantic_related1']	[['lot', 'lot get']]	1	1	1	1	0.847345	0.421053	0.0808081	0.111111	0.173913	19	0.874977	0.0526316
603	people are surprised with how others could refuse syrian refugees but don't look at how we treat people here #islamki1|s	1	0	['generatehom']	[['kill', 'ki1|']]	1	2	0	2	0.763378	0.15	0.1	0.047619	0.0454545	20	1	0.05
607	Wow, fanqs of Agent Carter are annoying boring.	0.989202	0.465166	['get_semantic_related1', 'addition']	[['annoying', 'annoying boring'], ['fan', 'fanq']]	2	1	1	1	0.661649	0	0.0222222	0	0.111111	8	0.534834	0.25
613	Turn on the oven before put interior the Turkey #SurvivalGuideToThanksGiving	0.988838	0.262877	['get_synonyms']	[['inside', 'interior']]	1	2	0	2	0.834307	0.3	0.027027	0.1	0.1	10	0.737123	0.1
617	The way to get start started is to relinquish speak and continue begin next doing. -Walt Disney	0.924647	0.0059065	['generatehom']	[['talking', 'ta1king']]	1	1	1	1	1	0.176471	0.0588235	0	0	17	0.994093	0.0588235
628	MILPITAS: Fire inspires Walmart evacuation disaster #SanJose	0.96335	0.0770501	['get_semantic_related1', 'get_synonyms']	[['evacuation', 'evacuation disaster'], ['prompt', 'inspire']]	2	2	0	2	0.776493	0.571429	0.428571	0.166667	0	7	0.92295	0.285714
633	i hate when i click the text notification at the top bc then it looks like i was waiting for a reply and shitty	0.999999	0.0295197	['get_synonyms']	[['shit', 'shitty']]	1	1	2	1	0.795534	0.166667	0.125	0	0	24	0.97048	0.0416667
634	RT LizCrokin: All advocacy citizens of the would unite if they happened knew elites in power influence are raping &cmp; attacks killing boys kids. They push for civih unrst to kee	0.998709	0.384466	['get_semantic_related']	[['knew', 'happened knew']]	1	2	0	2	0.873918	0.258065	0.258065	0.0384615	0	31	0.615534	0.0322581
649	shouts to pretty emo bitch @j3s_journal y`a11 show him some love his music will heal that void in your individual	0.998785	0.0344141	['generatehom', 'get_synonyms']	[["y'all", 'y`a11'], ['soul', 'individual']]	2	1	1	1	0.760561	0.15	0.018018	0.047619	0.0434783	20	0.965586	0.1
657	everyone should pay taxes #offendeveryonein4wordsi	0.996	0.202	['addition']	[['offendeveryonein4words', 'offendeveryonein4wordsi']]	1	2	0	2	0.717066	0.2	0.2	0.2	0.2	5	0.798	0.2
658	#politics Cuts to health patient wish proposed amid congressional budget shortfall	0.991798	0.0244502	['get_semantic_related1', 'get_semantic_related', 'get_synonyms']	[['health', 'health patient'], ['budget', 'congressional budget'], ['care', 'wish']]	3	2	0	2	0.703236	0	0	0	0.173913	11	0.97555	0.272727
661	rapper 50 cent mocked autistic man on twitter myspace.com #news	0.99943	0.000472649	['get_semantic_related1']	[['twitter', 'twitter myspace.com']]	1	2	0	2	0.796582	0.2	0.2	0	0	10	0.999527	0.1
676	putin: olympic ban on riussian athletes is result of political plot #sport	0.999924	0.182829	['insertion']	[['russian', 'riussian']]	1	2	0	2	0.785612	0.333333	0.333333	0	0	12	0.817171	0.0833333
678	Dems: Republicans to blame responsible for election voting disaster #politics	0.999928	0.143259	['generatehom']	[['republican', 'repubIican']]	1	2	0	2	0.999655	0.2	0.1	0	0	10	0.856741	0.1
687	we love #emiraticuisine! Let us try it and make a review critical	0.975345	2.82e-05	['get_semantic_related1']	[['review', 'review critical']]	1	1	1	1	0.763273	0	0.0483871	0.0833333	0.0769231	12	0.999972	0.0833333
693	Shorty gets got magic	0.994433	0.0207163	['get_semantic_related']	[['got', 'gets got']]	1	1	1	1	0.70438	0.25	0	0	0.173913	4	0.979284	0.25
699	#local forecast \| always quiet january weather	0.997177	0.123578	['get_semantic_related']	[['quiet', 'always quiet']]	1	2	1	2	0.730587	0.142857	0.142857	0	0	7	0.876422	0.142857
710	what are some good kind sure full only providing coverage foundations	0.982933	0.0290489	['get_semantic_related1']	[['good', 'good kind']]	1	1	1	1	0.869385	0.0909091	0.0909091	0	0	11	0.970951	0.0909091
719	#TopNews Gunman in Oregon college massacre responsible committed suicide	0.997312	0.226331	['get_semantic_related']	[['committed', 'responsible committed']]	1	2	0	2	0.891072	0	0.0121951	0.125	0.111111	9	0.773669	0.111111
736	You should look at their website, it's pretty detailed & has all the qualifying races listed. A lot are out west southern	0.668118	0.0143728	['get_semantic_related1']	[['west', 'west southern']]	1	1	1	1	0.798968	0	0.0227273	0	0	22	0.985627	0.0454545
760	but I already have the RBC App. Can`t it do that?	0.999999	0.0958566	['generatehom']	[["n't", 'n`t']]	1	1	1	1	0.870384	0.363636	0.181818	0	0	11	0.904143	0.0909091
761	We're sure currently having this regarding issue worked on & should be resolved solution by announce tomrrow. Debs	0.995879	0.229478	['omission']	[['tomorrow', 'tomrrow']]	1	1	1	1	0.870564	0.111111	0.0555556	0	0	18	0.770522	0.0555556
772	#sports Daily Flo: Cavs take going on Boston, Indians first spring winning game	0.993324	0.449002	['get_semantic_related', 'get_semantic_related1']	[['game', 'winning game'], ['take', 'take going']]	2	2	0	2	0.864496	0.307692	0.0126582	0	0.173913	13	0.550998	0.153846
776	Malaysia prosecutor tells just go right to cleMGA 2MDB over which central securities bank deposit story article #world #news	0.999672	0.314467	['get_semantic_related', 'get_semantic_related', 'get_synonyms']	[['bank', 'securities bank'], ['right', 'go right'], ['report', 'story']]	3	2	0	2	0.870504	0.105263	0.105263	0.0769231	0	19	0.685533	0.157895
798	homeland security computers vulnerable to cyber attacking: audit #tec	0.999717	0.221662	['get_synonyms', 'omission']	[['attack', 'attacking'], ['tech', 'tec']]	2	2	0	2	0.723398	0.333333	0.333333	0	0	9	0.778338	0.222222
811	pitt rb sir james conner diagnosed with hodgkins lymphoma #nnews	0.998188	0.0218969	['get_semantic_related', 'repetition']	[['james', 'sir james'], ['news', 'nnews']]	2	2	0	2	0.710905	0.6	0.7	0	0.1	10	0.978103	0.2
813	Center-right going candidate wins Portugal presidential vote outright going #news	0.999877	0.498675	['get_semantic_related1']	[['right', 'right going']]	1	2	0	2	0.802056	0	0.0105263	0	0	10	0.501325	0.1
816	#TopNews Jury finds accuse Taliban fighter f-16 gui|ty on all actual counts	0.999742	0.167112	['get_semantic_related1', 'omission', 'generatehom', 'get_semantic_related']	[['fighter', 'fighter f-16'], ['accused', 'accuse'], ['guilty', 'gui|ty'], ['count', 'actual count']]	4	2	0	2	0.91515	0.166667	0.0361446	0.1	0.0714286	12	0.832888	0.333333
817	Roy Moore is being framed picture by the fake media.	0.752319	0.12303	['get_semantic_related']	[['medium', 'smes medium']]	1	2	0	2	0.999655	0.2	0	0	0	10	0.87697	0.1
819	@Sportsnet Greg Zaun doesn't appear to be a Jays fan sports. I don't like watching your feed because he is on it.	0.947255	0.0125127	['get_semantic_related1']	[['fan', 'fan sports']]	1	1	1	1	0.878389	0.181818	0.0909091	0	0	22	0.987487	0.0454545
841	"I HATE the colour purple violet. It's SO Michelle Obama." @CostaDestinyyy Hillary would be just as bad going, if not big than Obama. @LG_OD_Dustin	0.876379	0.0219387	['get_semantic_related1', 'get_synonyms', 'get_semantic_related1']	[['purple', 'purple violet'], ['worse', 'big'], ['bad', 'bad going']]	3	2	0	2	0.845033	0.5	0.0619469	0.0357143	0.173913	24	0.978061	0.125
844	swedish pm looking at tightening laws after festival sex attacks #world #new	0.999	0.21	['omission']	[['news', 'new']]	1	2	1	2	0.871935	0.166667	0.166667	0	0	12	0.79	0.0833333
846	#miami city sues, but christmas light show goes on in south florida #locale	0.98	0.003	['get_synonyms']	[['local', 'locale']]	1	2	0	2	0.934357	0.307692	0.307692	0	0	13	0.997	0.0769231
851	when it will be enough deaths of black people to reorganize police dept? #fergusonthink_back	1	0.236	['get_synonyms']	[['remembers', 'think_back']]	1	2	0	2	0.883226	0.142857	0.142857	0.0666667	0.0625	14	0.764	0.0714286
855	what sean payton said after new orleans saints ota practice starting thursday #nnews	0.999915	0.257898	['repetition', 'get_synonyms', 'get_semantic_related1']	[['news', 'nnews'], ['saint', 'sant'], ['practice', 'practice starting']]	3	2	0	2	0.779695	0.538462	0.615385	0	0.0769231	13	0.742102	0.230769
859	thai beliebers we waiting for you @justinbieber #purposetour visit	1	0	['get_semantic_related']	[['tour', 'tour visit']]	1	1	1	1	0.740164	0.666667	0.666667	0.285714	0.222222	9	1	0.111111
865	feds to pittsburgh zoo: stop using dogs to maintain control elephants #new	0.999298	0.0781254	['get_semantic_related']	[['control', 'maintain control']]	1	2	0	2	0.839887	0.25	0.25	0	0	12	0.921875	0.0833333
866	Just first saw the devastating news out of Orlando with over 20 people murdered in yet another mass shooting. Worst in many though years. Heartbreaking.	0.737917	0.386629	['get_semantic_related', 'get_semantic_related1']	[['saw', 'first saw'], ['many', 'many though']]	2	2	0	2	0.903464	0	0	0	0	25	0.613371	0.08
868	it all comes down to the person you wanna talk to most when you're having a shitty day	1	0	['get_synonyms']	[['bad', 'shitty']]	1	1	1	1	0.804914	0.111111	0.111111	0	0	18	1	0.0555556
871	Employers all over the decade state say they are struggling to finGMD worker olds who can pass drug start testshttp://nyti.ms/27uGmih	0.971148	0.196808	['get_semantic_related']	[['find', 'found find']]	1	1	1	1	1	0.1	0.1	0.15	0	20	0.803192	0.05
879	The ONLY thing reason Democrats oppose opposition voter ID maws is to draw it easier faster for them to commit opposition vote dupery This is the whatever truth, and everyone know 'res it!	0.98327	0.0239281	['get_semantic_related1']	[['make', 'make making']]	1	2	0	2	0.999512	0.0606061	0.0606061	0	0	33	0.976072	0.030303
880	Myanmar's Suu Kyi et for sweeping power as electionw w9ins mount vernon #news	0.999936	0.457401	['get_semantic_related1', 'omission', 'insertion', 'addition']	[['mount', 'mount vernon'], ['set', 'et'], ['win', 'w9in'], ['election', 'electionw']]	4	2	0	2	0.626157	0.307692	0.0674157	0	0.142857	13	0.542599	0.307692
881	South Africa's Zuma under pressure as Eskom ex-boss alleges Gupta influence important #news	0.930499	0.158884	['get_semantic_related1']	[['influence', 'influence important']]	1	2	0	2	0.836749	0.384615	0.03125	0	0	13	0.841117	0.0769231
892	if you kidnapped me, I'd stay quiet about it. take me to a retreat in the mountains, I won'u kvetch.	0.999308	0.0170286	['get_synonyms', 'bitsquatting']	[['complain', 'kvetch'], ["n't", "n'u"]]	2	1	1	1	0.828574	0.15	0.025	0	0	20	0.982971	0.1
908	Well not really, just saying you should complete the book instead of leaving without it.	0.998921	0.472956	['get_semantic_related1']	[['leaving', 'leaving without']]	1	1	1	1	0.723976	0.0666667	0	0	0	15	0.527044	0.0666667
915	I forgot my lunch so instead I'm going to Costco to binge eat some samples because I am literally that broke broken	0.999987	0.254264	['get_semantic_related1']	[['broke', 'broke broken']]	1	1	1	1	0.725323	0	0	0	0	22	0.745736	0.0454545
918	masked man robs bank in painesville township (photos): investigators are searching for a masked man who robbed a bank friday i... #criminality	1	0.012	['get_synonyms']	[['crime', 'criminality']]	1	2	0	2	0.909204	0.181818	0.181818	0	0	22	0.988	0.0454545
930	finna write my boy girls yahyah back ! #free2tuff @true2956	0.791341	0.346537	['get_semantic_related1']	[['boy', 'boy girls']]	1	1	1	1	0.7186	0.3	0.3	0.333333	0.3	10	0.653463	0.1
932	Graduating colege is not a races race. People have differentw approach paths. Just finsh.	0.999836	0.391353	['get_semantic_related']	[['college', 'academy college']]	1	1	1	1	1	0.214286	0.214286	0	0	14	0.608647	0.0714286
935	#topnmws ucla shooter had 'kill list,' left went another victim: police	0.99553	0.310917	['bitsquatting', 'get_semantic_related']	[['news', 'nmws'], ['left', 'left went']]	2	2	0	2	0.808653	0.181818	0.181818	0.3	0.153846	11	0.689083	0.181818
942	DYK: Colerain and Winton Woods have never played each other. Taylor has a 22-22 career mark matthew vs. Colerain. @MikeDyer @taylorsportsAD	0.990894	0.000219639	['get_semantic_related1']	[['mark', 'mark matthew']]	1	1	1	1	0.740078	0.35	0.0598291	0.0952381	0.173913	20	0.99978	0.05
946	malaysia arrests iislamic legislature state suspects for grenade attack on bar sitting in 27 june #world #new	0.999994	0.00818755	['get_semantic_related1', 'get_semantic_related', 'repetition', 'get_semantic_related']	[['bar', 'bar sitting'], ['state', 'legislature state'], ['islamic', 'iislamic'], ['june', '27 june']]	4	2	0	2	0.913059	0.235294	0.235294	0	0	17	0.991812	0.235294
957	fire breaks out at old furniture store in butler county #new	0.955	0.003	['omission']	[['news', 'new']]	1	2	1	2	0.815067	0.272727	0.272727	0	0	11	0.997	0.0909091
961	#lost rt ryanjensen2028: rt if your apart of the 64 billion mi|lion people that elected donald j. trump as presiding of the uni u.s. states. not ru	0.999578	0.315466	['get_semantic_related1', 'get_synonyms', 'get_semantic_related', 'get_synonyms', 'generatehom']	[['united', 'united u.s.'], ['united', 'uni'], ['million', 'billion million'], ['president', 'presiding'], ['million', 'mi|lion']]	5	2	0	2	0.744461	0.222222	0.185185	0.04	0.0344828	27	0.684534	0.185185
966	rip boogie wanna	0.812901	0.139536	['get_semantic_related1']	[['boogie', 'boogie wanna']]	1	2	1	2	0.719128	0.333333	0.333333	0	0	3	0.860464	0.333333
985	People that are seemingly doing always better than me #MustBeBanned	0.995966	0.475915	['get_semantic_related']	[['better', 'always better']]	1	2	0	2	0.771278	0	0.0204082	0.111111	0.1	10	0.524085	0.1
987	can't let that mailman get away with your box of excellent!	0.999962	0.0440637	['get_synonyms']	[['awesome', 'excellent']]	1	1	2	1	0.71531	0.0909091	0.0909091	0	0	11	0.955936	0.0909091
989	good morning beautiful beauty	0.999821	0.343869	['get_semantic_related1']	[['beautiful', 'beautiful beauty']]	1	1	1	1	0.689907	0.25	0.03125	0	0.173913	4	0.656131	0.25
991	"Okay, first one to die killed lose" #SouthPark	0.999938	0.343054	['get_semantic_related1', 'get_synonyms']	[['die', 'die killed'], ['loses', 'lose']]	2	1	1	1	0.723989	0.625	0.5	0	0	8	0.656946	0.25
992	Saw 2 stickers on a car today. "Ready for Hillary" and "I Obamacare" might be the dumbest person with a drivers licence.	0.954861	0.217306	['get_synonyms']	[['license', 'licence']]	1	2	0	2	0.949227	0	0.0508475	0	0	22	0.782694	0.0454545
994	your contracted painters have removed the turning lane. why must we sit in traffic now to twist left?!	0.996893	0.157611	['get_synonyms']	[['turn', 'twist']]	1	1	1	1	0.805928	0.111111	0.111111	0	0	18	0.842389	0.0555556
999	#ObamaNextJob Lobby to require all Cristian's to wear a cross on their clothing. Easier for HIS Islamic Refugees to spot third and behead us.	0.736989	0.298605	['get_semantic_related1']	[['spot', 'spot third']]	1	2	0	2	0.825696	0.166667	0.0148148	0.0416667	0.04	24	0.701395	0.0416667
1009	You wanna play a hashtag game? We have one for you hosted by @GiselleEvns and @AndyHashtagger See you in 25 minuves	0.920725	0.00929441	['bitsquatting']	[['minute', 'minuve']]	1	2	0	2	0.682089	0	0.0555556	0.0869565	0.130435	21	0.990706	0.047619
1011	thank you for the follows @mamagonecrazyah @distillery_to @poojaadvani_ddw @rabbleboy @puppilovley @askdocg @edivvofficial have a great weekend	0.999989	0.14776	['get_synonyms']	[['week', 'weekend']]	1	1	2	1	0.866212	0.5625	0.5625	0.388889	0.388889	16	0.85224	0.0625
1013	RT Bart_39: MT CleverFounder: realDonaldTrump you going know the truth of how bad Ocare is. PUSH for #FullRepeal #NoReplace	0.971234	0.221417	['get_semantic_related']	[['know', 'going know']]	1	2	0	2	0.861004	0.368421	0.0446429	0.263158	0.173913	19	0.778583	0.0526316
1026	three explosions in one day 2. #seasidesemperfive 2. #chelsea 3. #charlottesville wish thank you obama!	0.996404	0.0422289	['get_semantic_related']	[['thank', 'wish thank']]	1	2	0	2	0.84452	0.533333	0.533333	0.0666667	0.0625	15	0.957771	0.0666667
1044	top court nominee merrick garland: social media respond reaction #politic	0.999957	0.0482477	['get_synonyms', 'get_semantic_related', 'omission']	[['supreme', 'top'], ['reaction', 'respond reaction'], ['politics', 'politic']]	3	2	0	2	0.700758	0.3	0.3	0	0	10	0.951752	0.3
1050	200% guarantee ensure trump wins.	0.995729	0.0636762	['get_semantic_related1']	[['guarantee', 'guarantee ensure']]	1	2	0	2	0.729707	0	0	0	0.173913	5	0.936324	0.2
1055	'@TheFive Again Juan Williams defending Obamacare...Like are you living in the REAL USA??? I'm a healthy male that rarely...i mean rarely use used'	0.99986	0.436335	['get_semantic_related1']	[['use', 'use used']]	1	2	0	2	0.844576	0.347826	0.027027	0.0333333	0.173913	23	0.563665	0.0434783
1063	The fakt I know forgot a tweet t-37 the first coupl second finisheds into a Do You Have an Eidetic Memory tst make me the answer I was lookin for.	0.999997	0.260086	['omission', 'get_synonyms', 'bitsquatting', 'get_semantic_related1', 'omission', 'get_semantic_related', 'get_semantic_related1', 'omission']	[['looking', 'lookin'], ['gave', 'make'], ['fact', 'fakt'], ['tweet', 'tweet t-37'], ['test', 'tst'], ['forgot', 'know forgot'], ['second', 'second finished'], ['couple', 'coupl']]	8	1	1	1	0.804645	0.166667	0.0666667	0	0.0322581	30	0.739914	0.266667
1068	John Mcdonnell: We need mexicans migrants because we have a skills lack shortage!!! How about educate British youth!? #MirrorLiveEU	0.992034	0.463145	['get_synonyms', 'get_semantic_related', 'get_semantic_related']	[['training', 'educate'], ['shortage', 'lack shortage'], ['migrant', 'mexicans migrant']]	3	1	1	1	0.663212	0.333333	0.027027	0.0454545	0.0416667	18	0.536855	0.166667
1083	#politics bush to welfare women in http://www.lufthansa.com 2994: 'get a husband'	0.998949	0.0110476	['get_semantic_related']	[['2994', 'http://www.lufthansa.com 2994']]	1	2	0	2	0.73179	0	0	0.0909091	0.173913	11	0.988952	0.0909091
1087	#TopNews Julia becomes tropical storm again as it mills off eastern cast	0.987565	0.108576	['omission']	[['coast', 'cast']]	1	2	0	2	0.680594	0	0.0119048	0.0833333	0.173913	12	0.891424	0.0833333
1088	lmao yeah he need not to try that again. He really thought shit was sweet for a instant	0.999992	0.117182	['get_synonyms']	[['moment', 'instant']]	1	1	1	1	0.848896	0.277778	0.0632911	0	0	18	0.882818	0.0555556
1090	I go as far put night vision scopes and ammo at this time Obama doing all he can ban shooters anmo 5 posits have ban shooters some ways dc	0.913114	0.197727	['insertion']	[['state', 'stzate']]	1	2	0	2	1	0.103448	0.0344828	0.0344828	0	29	0.802273	0.0344828
1093	No, you're not going to micromanage the non-violent thru stigmatizing them WE DON'T NEED GUNS Designed to do nothing but mass muvdering!	0.80347	0.00607998	['bitsquatting']	[['murdering', 'muvdering']]	1	2	0	2	0.841638	0	0.025	0	0.037037	22	0.99392	0.0454545
1094	reports find new issues at phoenix va #politic	0.9962	0.0157927	['omission']	[['politics', 'politic']]	1	2	0	2	0.821688	0.375	0.375	0	0	8	0.984207	0.125
1097	#politics Ryan fire destroyeds shutdown warning shot went another at White House	0.999772	0.186535	['get_semantic_related1']	[['shot', 'shot went']]	1	2	0	2	0.819353	0.166667	0.0833333	0	0	12	0.813465	0.0833333
1098	And why is that exactly, please continue stop with the scare tactics?!	0.998032	0.247346	['get_semantic_related']	[['stop', 'continue stop']]	1	1	1	1	0.827318	0	0	0	0	12	0.752654	0.0833333
1117	U.S. homes sell at strongest pace since month 2007 #business	0.70026	0.0425746	['get_semantic_related1']	[['since', 'since month']]	1	2	0	2	0.750315	0	0.0151515	0	0	10	0.957425	0.1
1118	OK Go and throw going up #DrunkBands @midnight	0.875145	0.0124922	['get_semantic_related1']	[['throw', 'throw going']]	1	2	0	2	0.847811	0	0.0571429	0.142857	0.125	8	0.987508	0.125
1141	#sports Wild's strong strengths fail refuse at the ever worst time not this in series shows quarterfinal opener	0.730856	0.362763	['get_semantic_related1']	[['time', 'time not']]	1	2	0	2	0.897953	0	0	0	0	18	0.637237	0.0555556
1144	russia faces may deadline for championships olympic return #sport	0.999934	0.272708	['get_semantic_related']	[['olympic', 'championships olympic']]	1	2	0	2	0.768802	0.333333	0.333333	0	0	9	0.727292	0.111111
1147	#topl RT mitchellvii: Trump won Independents in 2026, and yet, in every poll, he is underwater with "Independents" by big going double digits. B	0.683438	0.018878	['get_semantic_related1']	[['big', 'big going']]	1	2	0	2	0.926094	0.208333	0.0325203	0.0714286	0.0689655	24	0.981122	0.0416667
1160	Whoever runs this acount is my next new favorite individual.	0.997668	0.0523461	['insertion']	[['person', 'prerson']]	1	1	1	1	1	0.1	0.1	0	0	10	0.947654	0.1
1168	#topl rt susanstormxo: freaking ridiculous when are americans simply going to treat people like humans &amp; not statistics or step_on_it	0.981758	0.0419937	['get_synonyms']	[['race', 'step_on_it']]	1	2	0	2	0.763247	0.25	0.3	0.1	0.0909091	20	0.958006	0.05
1170	#local WIN! Cavs beat 3-0 Warriors 96-92 in Game 3 of NBA Finals	0.883194	0.0560531	['get_semantic_related1']	[['beat', 'beat 3-0']]	1	2	0	2	0.843502	0	0.0298507	0	0	13	0.943947	0.0769231
1180	â€œthereâ€™s a ways to do it better â€“ find it.â€ thomas h. edison	0.990705	0.259757	['addition', 'get_semantic_related1']	[['way', 'ways'], ['thomas', 'thomas h.']]	2	1	2	1	0.788897	0.307692	0.307692	0	0	13	0.740243	0.153846
1185	@ZachSB2997 @WorldOfHashtags @GiselleEvns little bit crab '	0.999868	0.231097	['get_semantic_related1']	[['little', 'little bit']]	1	2	0	2	0.752489	0.285714	0.0483871	0.5	0.173913	7	0.768903	0.142857
1199	Happy birthday celebrating blurryface |-/	0.999905	0.33298	['get_semantic_related1']	[['birthday', 'birthday celebrating']]	1	1	1	1	0.829758	0.4	0.2	0	0	5	0.66702	0.2
1213	not a road or monument anywhere for obamas in kenya and nothing for kenyans or kenya anywhere from obamas. ho ho ho!	0.761522	0.00162564	['addition']	[['obama', 'obamas']]	1	2	1	2	0.913824	0.318182	0.318182	0	0	22	0.998374	0.0454545
1215	policeman is a faggot fucking. the guy he attacked is gay. see the difference? #policebrutality #fergusonrmmembers	1	0.122	['bitsquatting', 'get_semantic_related']	[['remembers', 'rmmembers'], ['faggot', 'faggot fucking']]	2	2	1	2	0.800084	0.375	0.4375	0.125	0.117647	16	0.878	0.125
1216	jackson infrastructure loan prompts authority squabble #new	1	0.06	['omission']	[['news', 'new']]	1	2	1	2	0.831494	0.285714	0.285714	0	0	7	0.94	0.142857
1221	Hello is that Jose? Yep you've got the job but we are gonna wo let Louis arrest in charge.	0.999933	0.494507	['get_synonyms', 'get_semantic_related']	[['stay', 'arrest'], ['let', 'wo let']]	2	1	1	1	0.883855	0	0.0232558	0	0	19	0.505493	0.105263
1222	As OK AG, Scott Pruitt has had tried to undermine the Clean Water &ap; Clean Air Acts, putting #publichealth of Americans at zisk. #pollutingPruitt	0.995219	0.150663	['bitsquatting']	[['american', 'amebican']]	1	2	0	2	1	0.333333	0.166667	0.08	0	24	0.849337	0.0416667
1225	Child porn charge murders filed in Camden against N.J. chef	0.794883	0.405699	['get_semantic_related1']	[['charge', 'charge murder']]	1	2	0	2	0.718241	0	0	0	0	10	0.594301	0.1
1234	School is neverrr the put move	0.885835	0.0769014	['get_semantic_related']	[['move', 'put move']]	1	1	1	1	0.692304	0.333333	0.0344828	0	0	6	0.923099	0.166667
1245	gosh wow!!!! Betulllll	0.841103	0.0709373	['get_semantic_related']	[['wow', 'gosh wow']]	1	1	1	1	0.62224	0	0.125	0.166667	0.142857	3	0.929063	0.333333
1248	Thunderstorms today! With a high rates low of 76F and a rates low of 67F. #successrole #weather #mam8697	0.929121	0.0742551	['get_semantic_related1', 'get_semantic_related']	[['high', 'high low'], ['low', 'rates low']]	2	1	1	1	0.663578	0.166667	0.0555556	0.25	0	18	0.925745	0.111111
1253	Finished up a post about the Draft Lottery tonight. It has a collection of mock draft bulletin info, and Henry Ellenson is all over the place. #mubb	0.65781	0.366972	['get_semantic_related']	[['info', 'bulletin info']]	1	1	1	1	0.860245	0	0.0166667	0.037037	0.0357143	27	0.633028	0.037037
1256	Is the damage destruction threat of property land legitimate way of protest rallies? Burning Nw and UJ university halls & library?Breaking down parliament referendum doors Etc?	0.872143	0.385878	['get_semantic_related1']	[['destruction', 'destruction threat']]	1	1	1	1	0.75495	0.153846	0.115385	0	0	26	0.614122	0.0384615
1264	i spent $200 on perfume at sales and little else. today, i take down my tree and put it back in storage. #christmasafztermath	1	0	['insertion']	[['aftermath', 'afztermath']]	1	2	0	2	0.869612	0.173913	0.173913	0.0416667	0.0416667	23	1	0.0434783
1267	gov. inslee signs $26 billion euro1 transportation package #loc	0.999929	0.389384	['get_semantic_related1']	[['billion', 'billion euro1']]	1	2	0	2	0.700726	0.444444	0.444444	0	0	9	0.610616	0.111111
1272	I'm sorry am but by nature I'm a panicky individual	0.995806	0.05033	['insertion']	[['person', 'prerson']]	1	1	1	1	1	0.2	0	0	0	10	0.94967	0.1
1273	#upper_sidenews economic losses from u.s. 27 january storm around $2 billion: aon benfield	1	0.011	['get_synonyms', 'get_semantic_related']	[['top', 'upper_side'], ['january', '27 january']]	2	2	1	2	0.670187	0.307692	0.307692	0.0769231	0.0666667	13	0.989	0.153846
1279	#HowToLoseYourJob Talk about fight going club play	0.999983	0.397116	['get_semantic_related1', 'get_semantic_related1']	[['fight', 'fight going'], ['club', 'club play']]	2	2	0	2	0.665422	0	0.0363636	0.2	0.142857	7	0.602885	0.285714
1282	That @billclinton speak speech keynote in #PuertoRico felt underwhelming, felt like an old 16-year supporters campaign event festival event festivals on the resort island from the ninetys.	0.996078	0.242901	['get_semantic_related1']	[['old', 'old 16-year']]	1	1	1	1	0.756989	0.111111	0.111111	0.1	0	27	0.757099	0.037037
1291	capitals-panthers delayed because of absent paramedics #hockey teams	0.997	0.12	['get_semantic_related']	[['hockey', 'hockey teams']]	1	2	1	2	0.804734	0.25	0.25	0	0	8	0.88	0.125
1293	#IGetALittleWeirdAbout people scraping their fork on their teeth. Fork that resound!	0.681246	0.00324383	['get_synonyms']	[['noise', 'resound']]	1	2	0	2	0.638716	0	0.0123457	0.0833333	0.0833333	11	0.996756	0.0909091
1305	nowadays kids bringing guns to school and kindergarten considering this's norm #nogunsfmrcriminals	1	0	['bitsquatting']	[['for', 'fmr']]	1	2	0	2	0.818053	0.166667	0.166667	0.0769231	0.0769231	12	1	0.0833333
1315	#health Discovery a step toward schizophrenia's cause result	0.967951	0.110735	['get_semantic_related1']	[['cause', 'cause result']]	1	2	0	2	0.667257	0	0	0	0	8	0.889265	0.125
1318	There were many know reasons I voted voting for President Trump and two know reasons I did not!! Hillary Clinton #saturdaymorning	0.991717	0.45958	['get_semantic_related', 'get_semantic_related1']	[['reason', 'know reason'], ['voted', 'voted voting']]	2	2	0	2	0.89286	0.333333	0.00934579	0.05	0.173913	21	0.54042	0.0952381
1319	The best component_part of goifg into work at 20:30 is that I have timeu for /2/ epispodes of Gossip Girl before gets getting redy	0.999999	0.160186	['get_semantic_related', 'insertion', 'omission', 'addition', 'get_synonyms', 'get_synonyms', 'bitsquatting']	[['getting', 'gets getting'], ['episode', 'epispode'], ['ready', 'redy'], ['time', 'timeu'], ['part', 'component_part'], ['two', '2'], ['going', 'goifg']]	7	1	1	1	0.750111	0	0.0515464	0	0.153846	24	0.839814	0.291667
1323	'Star Wars' bl2asts session opening weekend record straight with $238 jillion #business	0.951089	0.204771	['get_semantic_related']	[['star', 'bollywood star']]	1	2	0	2	1	0.166667	0.166667	0.222222	0	12	0.795229	0.0833333
1326	how about @senatemajldr #doyourjob and confirm merrick garland? #obamasvishlist	0.997165	0.00458614	['bitsquatting']	[['swish', 'svish']]	1	2	0	2	0.711694	0.555556	0.555556	0.333333	0.3	9	0.995414	0.111111
1340	"do you have any more __?" "no ma'am" "why not" "bc it's sold out for the day" "bc you didn't make enough" lady it is 8pm 8am #paneraprobs	0.996782	0.39644	['get_semantic_related1']	[['8pm', '8pm 8am']]	1	1	1	1	0.905655	0.5	0.5	0.025641	0.025	28	0.60356	0.0357143
1341	should i introduce pentagon to my workmate let image what will happen wo nol.	0.999947	0.283203	['bitsquatting', 'get_synonyms', 'get_semantic_related1']	[['lol', 'nol'], ['see', 'image'], ['happen', 'happen wo']]	3	1	1	1	0.85833	0	0.0735294	0	0	14	0.716797	0.214286
1343	Job of 'redding up' Willie Stargell Field everyone brings different high school students together alone #local	0.991611	0.450149	['get_semantic_related', 'get_semantic_related1', 'get_semantic_related1']	[['brings', 'everyone brings'], ['school', 'school student'], ['together', 'together alone']]	3	2	0	2	0.775869	0	0.0247934	0.181818	0.0588235	16	0.549851	0.1875
1350	Weed is now legal matters. #2026In4Words	0.743803	0.141179	['get_semantic_related1']	[['legal', 'legal matters']]	1	2	0	2	0.639809	0	0	0.2	0.166667	6	0.858821	0.166667
1354	#sports NBA referee Kennedy tell lets Yahoo he is gay after Rondo's slur	0.972125	0.479346	['get_semantic_related1']	[['tell', 'tell let']]	1	2	0	2	0.816893	0	0	0	0	13	0.520654	0.0769231
1360	magic to play raptors in regular-season game in uk #sports	0.999826	0.384828	['get_synonyms']	[['london', 'uk']]	1	2	0	2	0.709457	0.3	0.3	0	0	10	0.615172	0.1
1368	U.S. lawmakers you wish health agencies to lower prostate cancers diseases narcotics drug price #health	0.99943	0.0342182	['get_semantic_related1', 'addition', 'get_synonyms']	[['agency', 'agency reported'], ['cancer', 'cancers'], ['want', 'wish']]	3	2	0	2	0.822949	0.0666667	0.0666667	0	0	15	0.965782	0.2
1370	I hate when people get mad at me cause i dont nâ€™t talk	0.999302	0.00323966	['get_semantic_related1']	[['dont', 'dont nâ€™t']]	1	1	1	1	0.809039	0	0.04	0	0	13	0.99676	0.0769231
1374	#topoews spanish police find looking body of missing u.s. tourist	0.999	0.048	['bitsquatting', 'get_semantic_related']	[['news', 'oews'], ['find', 'find looking']]	2	2	1	2	0.605846	0.2	0.2	0.1	0.0909091	10	0.952	0.2
1380	oh yeah. young guy with a lot of talent impressed	0.995286	0.292603	['get_semantic_related1']	[['talent', 'talent impressed']]	1	1	1	1	0.705678	0.3	0.3	0	0	10	0.707397	0.1
1385	*One Dance comes on show radio* Me: oi can you needed would serve, I waona let listen to this Boss: 9es, ir!	0.843401	0.332461	['get_semantic_related1']	[['yes', 'yes certainly']]	1	1	1	1	1	0.1	0.1	0	0	20	0.667539	0.05
1396	woman dies after swiss train attack, two girls in concerns serious sicknesses #press	0.999187	0.11554	['get_semantic_related', 'get_synonyms', 'get_synonyms']	[['serious', 'concerns serious'], ['news', 'press'], ['condition', 'sicknesses']]	3	2	0	2	0.721654	0.230769	0.230769	0	0	13	0.88446	0.230769
1399	Portland-based The Clymb seeks chief Instagrammers to document adventures on six dream wish trips #tech	0.998103	0.275831	['get_semantic_related1']	[['dream', 'dream wish']]	1	2	0	2	0.767528	0	0.0165289	0	0	15	0.724169	0.0666667
1408	jfc am i really going on hour ten of this fight? why am i so shitty	1	0	['get_synonyms']	[['bad', 'shitty']]	1	1	1	1	0.714865	0.3125	0.3125	0	0	16	1	0.0625
1413	lincoln hills probe: three eight more staffers placed given on leave #politic	0.980174	0.00290563	['get_semantic_related1', 'get_semantic_related1', 'omission']	[['three', 'three eight'], ['placed', 'placed given'], ['politics', 'politic']]	3	2	0	2	0.720782	0.166667	0.166667	0	0	12	0.997094	0.25
1419	fiat chrysler, cummins spar over costs of diesel emission recall #engineers	1	0	['get_synonyms']	[['tech', 'engineers']]	1	2	0	2	0.743205	0.363636	0.363636	0	0	11	1	0.0909091
1422	#GenerousMSG has adopted orphans, leprosy patient persons, prostitutes, transgenders edc. as his own woman children Thank you Dr. @Gurmeetramrahim Ji	0.911809	0.460101	['get_semantic_related', 'bitsquatting', 'get_semantic_related1']	[['child', 'woman child'], ['etc', 'edc'], ['patient', 'patient person']]	3	1	1	1	0.894593	0	0.0347222	0.0952381	0.0869565	20	0.539899	0.15
1423	This is gun: About to give an interview to Toronto's CTV News over Nina's iPad. I hope, before I retire, I get to conduct one by hologram!	0.996193	0.418301	['bitsquatting']	[['fun', 'gun']]	1	1	1	1	0.790853	0	0	0	0	27	0.581699	0.037037
1424	My mama know else I doca n'u ljike her husbnd , idk why she got gets me in this fool damn yeah passenger car drivers TAKE ME HOME!	0.999964	0.343895	['get_semantic_related1', 'bitsquatting', 'get_semantic_related', 'get_semantic_related']	[['home', 'home in'], ["n't", "n'u"], ['damn', 'fool damn'], ['car', 'passenger car']]	4	1	1	1	0.890899	0.214286	0.25	0	0	28	0.656105	0.142857
1439	'+and the preservation and property-based issue itself are all marginal in mainstream movement discourse. It's a blind bit.'	0.999992	0.110176	['get_semantic_related1']	[['spot', 'spot qualifying']]	1	2	0	2	1	0.0555556	0	0	0	18	0.889824	0.0555556
1441	geez wow! this is gorgeous!	1	0	['get_semantic_related']	[['wow', 'geez wow']]	1	1	1	1	0.791892	0.4	0.4	0	0	5	1	0.2
1445	2day near Monroe AvenueÂ Super WomanÂ fought sum robots. The fight continue was destructive & sum robots r cleaning up	0.972853	0.0864013	['get_semantic_related1']	[['fight', 'fight continue']]	1	1	1	1	0.833376	0.166667	0.00757576	0	0	18	0.913599	0.0555556
1448	#IfICouldntLie I would never be able to find my "so safe place"...	0.91843	0.275917	['get_semantic_related']	[['safe', 'so safe']]	1	2	0	2	0.809249	0	0.06	0.0769231	0.0714286	12	0.724083	0.0833333
1450	4 face weapons and drug crack charge fees in Newark	0.997022	0.168332	['get_semantic_related1']	[['drug', 'drug crack']]	1	2	0	2	0.815429	0.1	0	0	0	10	0.831668	0.1
1451	a automated system of licensing and registration is the perfect device to deny gun ownership to the bourgeoisie. -vladimir ilyich lenin v.i.	0.999947	0.00238068	['get_semantic_related', 'get_semantic_related1']	[['system', 'automated system'], ['lenin', 'lenin v.i.']]	2	2	0	2	0.722385	0.181818	0.181818	0	0	22	0.997619	0.0909091
1453	you know what distinguish me why Bernie would be good for the country? Even though he isn't run_low to get to the actual party election	0.996258	0.147151	['get_synonyms', 'get_synonyms', 'get_semantic_related']	[['tell', 'distinguish'], ['going', 'run_low'], ['election', 'party election']]	3	1	1	1	0.795	0	0.0430108	0	0	25	0.852849	0.12
1470	yes when I walk i consider things out it's a time to consider out your solved problems	0.994142	0.133403	['get_synonyms', 'get_semantic_related']	[['think', 'consider'], ['problem', 'solved problem']]	2	1	1	1	0.78947	0	0.0327869	0	0	17	0.866597	0.117647
1480	Obama pay_off $400 mi||ion to free 4 white folks from Iran and we cant send guy cops thay murder Black folk to jail for anything.	0.980109	0.0707818	['get_semantic_related', 'get_synonyms', 'generatehom']	[['cop', 'guy cop'], ['paid', 'pay_off'], ['million', 'mi||ion']]	3	2	0	2	0.788497	0.16	0.0373134	0	0	25	0.929218	0.12
1493	Playa Hermosa was also awful....until I realized it was pretty much a shark breeding ground and a fish head washed up on le beach.	0.852329	0.436942	['get_synonyms']	[['awesome', 'awful']]	1	1	1	1	0.797476	0.208333	0.023622	0	0	24	0.563058	0.0416667
1497	The measure of will power powerful to ascertain my partying imbibing during working houZARs, diverted to a constructive network channel, would have puddle me President. #aa	0.977784	0.224967	['get_synonyms']	[['drinking', 'pledge']]	1	1	1	1	1	0.0769231	0.0769231	0	0	26	0.775033	0.0384615
1502	canton man charged in home invasion at ua student apartment: malik watson, 28, of canton, is the fourth person charged in conn... #penal	1	0	['get_synonyms']	[['crime', 'penal']]	1	2	0	2	0.848614	0.26087	0.26087	0.0416667	0	23	1	0.0434783
1507	Days in South beach shore	0.842035	0.266475	['get_semantic_related1']	[['beach', 'beach shore']]	1	1	1	1	0.674666	0	0	0	0	5	0.733525	0.2
1542	comin to the game ?	0.612229	0.422304	['omission']	[['coming', 'comin']]	1	1	1	1	0.615961	0.2	0.2	0	0	5	0.577696	0.2
1551	'@Jarmadillos I went a bit little dark on this one'	0.994419	0.279671	['get_semantic_related']	[['little', 'bit little']]	1	2	0	2	0.860875	0.2	0.1	0.0909091	0.0833333	10	0.720329	0.1
1554	Bill #clintons #wikipedia page is hackd wiv #racist ms %URL% #hacked #message	0.90247	0.232152	['omission']	[['msg', 'ms']]	1	2	0	2	0.738958	0.583333	0.0495049	0.0833333	0.173913	12	0.767848	0.0833333
1555	pitt head coach dixon: tough regular season prepared pitt for ncaa run #nnews	0.999665	0.157491	['repetition']	[['news', 'nnews']]	1	2	0	2	0.777196	0.384615	0.461538	0	0.0769231	13	0.842509	0.0769231
1557	exclusive: husky oil spill in canadian river followed two others nearby - records #medium	0.999671	0.0511361	['get_synonyms']	[['environment', 'medium']]	1	2	0	2	0.701975	0.285714	0.285714	0	0	14	0.948864	0.0714286
1566	How many job Congress govern has increases generated in 60 2007 year weeks without any bribe.	0.652789	0.14964	['get_semantic_related']	[['year', '2007 year']]	1	1	1	1	0.828341	0.0625	0	0	0	16	0.85036	0.0625
1567	if #brendanrodgers comes in though then that must mean lawwell will need to relinquish his grip. exciting times!! get it cause. #celtic	0.987	0.172	['get_synonyms']	[['done', 'cause']]	1	1	2	1	0.780684	0.272727	0.272727	0.0416667	0.0416667	22	0.828	0.0454545
1575	Wonderful tweet! Happiness is critical key!	0.999974	0.0208712	['get_semantic_related']	[['key', 'critical key']]	1	1	1	1	0.731605	0.333333	0	0	0	6	0.979129	0.166667
1584	Watermelon poptarts actually longer exist 1 @kelsey_vsetecka	0.999698	0.0905656	['generatehom', 'get_semantic_related']	[['lmao', '1'], ['exist', 'longer exist']]	2	1	1	1	0.64774	0.714286	0.037037	0.142857	0.173913	7	0.909434	0.285714
1585	cleveland officials withdraw claim that tamir rice estate owes money for ambulance bills: mayor frank nackson on yesterday apol... #trespasses	0.999997	0.323609	['get_synonyms', 'get_synonyms', 'bitsquatting']	[['crime', 'trespasses'], ['thursday', 'yesterday'], ['jackson', 'nackson']]	3	2	0	2	0.72622	0.3	0.25	0	0.05	20	0.676391	0.15
1598	u might want to get those wellies out - looks same it could be sloppy - and I don'4 just mean the people in the infield	0.994335	0.263381	['get_synonyms', 'bitsquatting']	[['like', 'same'], ["n't", "n'4"]]	2	1	1	1	0.889023	0.153846	0.153846	0	0	26	0.736619	0.0769231
1599	Do you think I will be able to wait 2 yeas until I image Ana's ceremonies wedding holiday pants dress? The understand do is NO	0.999898	0.163088	['get_semantic_related']	[['year', '2007 year']]	1	1	1	1	1	0.24	0.08	0	0	25	0.836912	0.04
1606	Thank you to everyone who supported #CaptainAmericaCivilWar this weekend!! And for those who during saw it twic...I owe you something extra	0.99998	0.251108	['get_synonyms', 'get_semantic_related', 'omission']	[['special', 'extra'], ['saw', 'during saw'], ['twice', 'twic']]	3	1	1	1	0.861556	0.238095	0.190476	0.0434783	0.0416667	21	0.748892	0.142857
1623	house passes bill requiring epa action takes on lead-laced water #midst	1	0.141	['get_semantic_related', 'get_synonyms']	[['action', 'action take'], ['environment', 'midst']]	2	2	0	2	0.72443	0.272727	0.272727	0	0	11	0.859	0.181818
1624	leave would for and I just want to know when you will be continue. Are you tryna decision move to TXST	0.999473	0.195979	['get_semantic_related1', 'get_synonyms', 'get_semantic_related']	[['leave', 'leave would'], ['staying', 'continue'], ['move', 'decision move']]	3	1	1	1	0.811452	0	0.0754717	0.0526316	0.047619	21	0.804021	0.142857
1629	yemeni government suspends participation in peace talks, expect demands guarantees #world #new	0.999982	0.240152	['get_semantic_related']	[['demand', 'expect demand']]	1	2	0	2	0.715242	0.166667	0.166667	0	0	12	0.759848	0.0833333

## Sheet: Sample_Toxic
original_id	adversarial	oldscore	newscore	actions	changedict	numberofperturbedwords	previousoutput	newoutput	originallabel	semanticscore	beforegrammarerrors	aftergrammarerrors	beforespellingerrors	afterspellingerrors	Spell	Wordlen	SuccessRate	Perturb
1	==Thanks== I just did one when other postings baffle, but I tthink I'm coverad under the obvious-vandalis- eception at this oint. Regardless, I'm going with what you saidm! Thanks for the dedication and commodity editing. Geez, what a dick that guy is...!	0.79267	0.432912	['repetition', 'bitsquatting', 'get_synonyms', 'addition', 'omission', 'bitsquatting', 'omission', 'get_synonyms']	[['think', 'tthink'], ['covered', 'coverad'], ['crossed', 'baffle'], ['said', 'saidm'], ['exception', 'eception'], ['vandalism', 'vandalis-'], ['point', 'oint'], ['good', 'commodity']]	8	1	1	1	0.71386	0	0.0410256	0	0.12	0.12	43	0.567088	0.186047
7	::Talk or i kills you!	0.933362	0.0919226	['addition']	[['kill', 'kills']]	1	2	0	2	0.796169	0.4	0.125	0	0	0	5	0.908077	0.2
9	" == See Also items == I see a couple of things listed in the See Also section where I don't see the relevance to this article. ""Shithead"" is an insult meaning stupid, but I don't see any connection to ""chicken red_cent"" except that both include the word ""red_cent"". And the ""sow's ear effect"" article refers to an economic term. "	0.622229	0.0863945	['get_synonyms']	[['shit', 'red_cent']]	1	2	0	2	0.683056	0.269841	0.0415225	0	0	0	63	0.913605	0.015873
10	Sign your statements. Anyways, is this the episode that some carbohydrate fat fuxck phoney from the audience was successor chosen to be a judge and made comments like he's the 3hit and knew what he was spill_the_beans about, when in reality, he's just a carbohydrate fat fuxck phoney?	0.999011	0.29005	['get_semantic_related', 'get_synonyms', 'bitsquatting', 'get_semantic_related', 'get_synonyms', 'insertion']	[['chosen', 'successor chosen'], ['bastard', 'phoney'], ['shit', '3hit'], ['fat', 'carbohydrate fat'], ['talking', 'spill_the_beans'], ['fuck', 'fuxck']]	6	2	0	2	0.812034	0.125	0.026178	0	0.0535714	0.0535714	48	0.70995	0.125
13	== Laughter and Gelotology == As of today, I am unawarex of a way to change the his5tory of a page to reflecu an IP change as your qsername. The only tbhing you can do is make surea that in the futurd, you keepc yourself logged in. Sorry about that. Keep necessitate questions ), and don't fofrget to bless your replies with fourr tiles, to indicateg a blessature piece. |	0.99746	0.485131	['addition', 'addition', 'bitsquatting', 'bitsquatting', 'addition', 'get_semantic_related1', 'insertion', 'addition', 'insertion', 'insertion', 'bitsquatting', 'get_synonyms', 'get_synonyms', 'addition']	[['unaware', 'unawarex'], ['keep', 'keepc'], ['reflect', 'reflecu'], ['username', 'qsername'], ['sure', 'surea'], ['signature', 'signature piece'], ['history', 'his5tory'], ['indicate', 'indicateg'], ['thing', 'tbhing'], ['forget', 'fofrget'], ['future', 'futurd'], ['asking', 'necessitate'], ['sign', 'bless'], ['four', 'fourr']]	14	1	1	1	0.871747	0	0.0454545	0.0140845	0.180556	0.166471	72	0.514869	0.194444
21	you are a fuckinb wierdo (and your poem fellates)	0.99341	0.30382	['addition', 'get_synonyms']	[['fuckin', 'fuckinb'], ['suck', 'fellate']]	2	2	0	2	0.646933	0	0.111111	0	0.0909091	0.0909091	9	0.69618	0.222222
23	" :::::As Parrot of Doom before, you are again stating that it's ""irrelevant"" without explaining why. You are also making a personal attack on me by calling it ""guff"", which is ""gooselike nonsense"" according to Merriam-Webster. Are you sure that it's gooselike nonsense? "	0.565539	0.100159	['get_synonyms']	[['foolish', 'gooselike']]	1	2	0	2	0.633014	0.266667	0.0558376	0	0	0	45	0.899841	0.0222222
26	This user is a prick who removes the comments of others.	0.817326	0.15013	['get_synonyms']	[['dick', 'prick']]	1	2	0	2	0.760435	0	0	0	0	0	11	0.84987	0.0909091
29	:Wikipedia can be improved by removing content added by cretins like you. Fancy that.	0.944454	0.0620596	['get_synonyms']	[['idiot', 'cretin']]	1	2	0	2	0.866792	0.214286	0.0714286	0	0	0	14	0.93794	0.0714286
35	FOR HALLOWEEN YOU SHOULD TTLY GO AS A STRIPPER. Then when your mother forces you to go trick-or-treating, you'd show her your costume and tell her to ruck on that. WOTUSAY	0.913579	0.411428	['bitsquatting']	[['suck', 'ruck']]	1	2	0	2	0.659576	0	0.0163934	0.0285714	0.0285714	0	32	0.588572	0.03125
36	== Domain .su == Domain .su is used now,it's not reserved. I living in Russia, i fuck. It's price 600 ruble. see here: http://www.nic.ru/?ipartner=349 and here: http://www.nic.ru/dns/service/su.html ps. sorry for my english =)	0.985979	0.475938	['get_synonyms']	[['know', 'fuck']]	1	1	1	1	0.831183	0.447368	0.0882353	0.0204082	0.0204082	0	38	0.524062	0.0263158
41	At least Theo proved that he is an unlearned bigot.	0.672253	0.0291583	['get_synonyms']	[['ignorant', 'unlearned']]	1	2	0	2	0.758806	0.2	0	0	0	0	10	0.970842	0.1
44	==no it isn't== fucku this i've just realised! :when did they send it? in the article it says it crossed the continent over three weeks but there's a bit of ambiguity as to the date.	0.77767	1.95e-05	['addition']	[['fuck', 'fucku']]	1	2	0	2	0.782752	0.162162	0.162162	0	0.025	0.025	37	0.999981	0.027027
45	You disrespectful insensitive btthole a dsgrace to Germany and human_beings....I will find you.	0.859854	0.317692	['omission', 'get_semantic_related', 'get_synonyms', 'omission']	[['butthole', 'btthole'], ['insensitive', 'disrespectful insensitive'], ['humanity', 'human_beings'], ['disgrace', 'dsgrace']]	4	2	0	2	0.631144	0.307692	0.0571429	0	0.133333	0.133333	13	0.682308	0.307692
46	Vandalism warning Please do not idiot fool with articles by replacing sections with obscenity. You will be reported.	0.688616	0.0410119	['get_semantic_related']	[['fool', 'idiot fool']]	1	1	1	1	0.779007	0.210526	0.0108696	0	0	0	19	0.958988	0.0526316
51	i coe looking 4 why im ment to take this im 16 and looking 4 what this chemical is am told to take what it will do to me and my baby what side effects there are and u dont put red_cent on here that answers ne of my questions thats why yous didnt start with pregnancy because there nothing on this have_a_go_at_it site about taking it when pregnant because yous probly dont know	0.869008	0.290173	['get_synonyms', 'omission', 'get_synonyms']	[['shit', 'red_cent'], ['come', 'coe'], ['fucking', 'have_a_go_at_it']]	3	2	0	2	0.879343	0.162162	0.0559701	0	0	0	74	0.709827	0.0405405
57	" ==Discography== ===Albums=== *20p08: All Around the World (with Diddy) ===Singles=== *20p08: Blame It On Me *20p08: Furious *20p08: I'm Fucked Up == Track listing == All sonos were written, grow, and arrangedx by Lloyd, except ""Girls Around the World"", which was co-written by Lil Wayne. "	0.901748	0.477902	['addition', 'insertion', 'get_synonyms', 'bitsquatting']	[['arranged', 'arrangedx'], ['2008', '20p08'], ['produced', 'grow'], ['song', 'sono']]	4	1	1	1	0.656921	0	0.0521739	0	0.0877193	0.0877193	60	0.522098	0.0666667
69	" == U.S. Parkearth Bordering Mexico, Shut Since 2OO6, Remains Off-Limits As Violence Escalates == Four years after ederal offcials quietly surrendered thousansds of acres of America's border to Mexican dbug gang_ups and illegals, there still are ""no plans to renovate reoopen"" the taxpayer-owned ntional park arlington earths. Roughly 3,500 acres of taxpayer-funded ggovernment earth in Arizona h…	0.698593	0.492602	['get_semantic_related', 'bitsquatting', 'get_semantic_related1', 'addition', 'get_semantic_related1', 'insertion', 'get_synonyms', 'bitsquatting', 'insertion', 'insertion', 'omission', 'get_synonyms', 'insertion', 'addition', 'bitsquatting', 'bitsquatting', 'addition', 'repetition', 'addition', 'bitsquatting', 'addition', 'insertion', 'omission', 'get_synonyms', 'omission', 'omission', 'repetiti…	[['reopen', 'renovate reopen'], ['three', '4hree'], ['posted', 'posted gains'], ['notice', 'noticec'], ['park', 'park arlington'], ['thanks', 'thanjks'], ['gang', 'gang_up'], ['closure', 'closupe'], ['concern', 'comncern'], ['released', 'relewased'], ['closed', 'closd'], ['violence', 'vehemence'], ['section', 'sectuion'], ['safe', 'safel'], ['human', 'h5man'], ['drug', 'dbug'], ['san', 'sans'], […	35	1	1	1	0.960218	0	0.0234209	0.00629723	0.0842627	0.0779655	713	0.507398	0.0490884
74	all cheese comes from the breasts of a tart in maumee	0.822658	0.0264542	['get_synonyms']	[['whore', 'tart']]	1	2	0	2	0.710285	0.272727	0.181818	0	0	0	11	0.973546	0.0909091
75	:You might well like to consider that I don't give a shat what you do or think.	0.95979	0.122733	['get_semantic_related', 'bitsquatting']	[['like', 'well like'], ['shit', 'shat']]	2	2	0	2	0.712913	0.176471	0.0327869	0	0	0	17	0.877267	0.117647
76	== GELLER AND SKEPTICS == Skeptics like Paul Kurtz only did a HALF-ASS JOB on Geller, omitting the fact he however made his wealth from mineral dowsing and not from bending spoons and forks. The only place in the world this info is missing is on Wikipedia. Just because the Skeptics did a HALF-ASS job on Geller does not mean the info has to be omitted from Wikipedia. Geller did not get his mansion…	0.574321	0.49128	['get_semantic_related']	[['made', 'however made']]	1	2	0	2	0.953376	0	0.00273224	0	0	0	81	0.50872	0.0123457
79	:Ash blonde, I think. Dyed hair darker/black from 1957. Occasionally had more natural hair color, USA, post-USA, in Kissin' Cousins and off scre3en/stage e.g. 1967.	0.912272	0.499329	['insertion', 'get_synonyms']	[['screen', 'scre3en'], ['army', 'USA']]	2	1	1	1	0.756788	0.24	0.010989	0.03125	0.0294118	-0.00183823	25	0.500671	0.08
80	:::::: You're going a laar, do some damna analysis research or even a good search before accusing denouncing bad faith spirit. Cool your jets, Starsky. ''''''	0.880728	0.0547377	['get_semantic_related', 'get_semantic_related1', 'get_semantic_related1', 'get_semantic_related1', 'bitsquatting', 'addition']	[['research', 'analysis research'], ["'re", "'re going"], ['faith', 'faith spirit'], ['accusing', 'accusing denouncing'], ['liar', 'laar'], ['damn', 'damna']]	6	2	0	2	0.87633	0.115385	0.0373832	0	0.0322581	0.0322581	26	0.945262	0.230769
84	Remove some isdiot's mentions of snails and berets.	0.952099	0.0816452	['insertion']	[['idiot', 'isdiot']]	1	2	0	2	0.608579	0.125	0.0208333	0	0.111111	0.111111	8	0.918355	0.125
86	== Suckish == Wiregrass is one story high and in the middle of nowhere and suckcs huge significant pgnis. PENISPENISPENIS!	0.997445	0.365355	['get_semantic_related1', 'bitsquatting', 'addition']	[['huge', 'huge significant'], ['penis', 'pgnis'], ['suck', 'suckc']]	3	2	0	2	0.792657	0	0.0582524	0.0555556	0.210526	0.154971	23	0.634645	0.130435
88	"I am unaware of Jon Lee Anderson referring to Che Detractors as ""useful bastard idiots"" or anything similar. He is a reporter and scholar and does not revert to sophmorish partisan insults or extreme hyperbole. Also yes it matters that he wrote the definitive 800 page biography ... which is a far cry from a short 200 pg Cuban exile rant with very little sourcing - which is what Fontova's drive…	0.794456	0.493826	['get_semantic_related']	[['idiot', 'bastard idiot']]	1	1	1	1	0.904436	0	0.0306407	0.025974	0.025641	-0.000333	75	0.506174	0.0133333
92	== Edit request on 26 August 2012 == you fellate	0.951905	0.00834645	['get_synonyms']	[['suck', 'fellate']]	1	2	0	2	0.694033	0	0.0888889	0	0	0	14	0.991654	0.0714286
95	== the most sico jewish insanity == jews just confirmed that Hitler was right in this Holly task in cleaning humanity from jews	0.768717	0.31415	['bitsquatting']	[['sick', 'sico']]	1	2	0	2	0.656345	0	0.034188	0	0	0	24	0.68585	0.0416667
100	Harro5 is an imbecile. 29 June 2005 23:34 (UTC)	0.765935	0.0542029	['get_synonyms']	[['idiot', 'imbecile']]	1	2	0	2	0.750143	0.4	0.0238095	0.0833333	0.0833333	0	10	0.945797	0.1
105	I agree. You are rude and im-ature.	0.827676	0.483069	['bitsquatting']	[['immature', 'im-ature']]	1	2	0	2	0.759518	0.285714	0.0344828	0	0.125	0.125	7	0.516931	0.142857
106	The article contains two different dates and is internally contradictory. Please just pick one for the time being and let's not have ourselves look like complete cretins.	0.800562	0.00719285	['get_synonyms']	[['idiot', 'cretin']]	1	2	0	2	0.844144	0.0740741	0	0	0	0	27	0.992807	0.037037
108	" {| distinctive style=""background-color: #fdffe7; border territory: 1px solid #fceb92;"" |lightblue rowspan=""2"" distinctive style=""vertical axis-align: halfway; fill_out: 5px;"" | == A BARNSTAR UP YOUR ASS == == REASONS == VANDALISM.(PROMOTION) PROMOTING PRESONAL AGENDA.(NATIONALIST,RACIST,INDIAN) DISCREDITING WIKIPEDIA. SHORT SIGHTED EDITING. MISUSE OF EDITORIAL RIGHTS. THEATENING TO BLOCK …	0.741572	0.437305	['get_semantic_related1', 'get_synonyms', 'get_semantic_related1', 'get_semantic_related', 'get_synonyms', 'get_semantic_related']	[['vertical', 'vertical axis'], ['middle', 'halfway'], ['border', 'border territory'], ['style', 'distinctive style'], ['padding', 'fill_out'], ['rowspan', 'lightblue rowspan']]	6	2	0	2	0.887814	0.23301	0.0324786	0.0272727	0.0258621	-0.00141066	103	0.562695	0.0582524
110	:Be WP:Civil. Your told me to be WP:Civil yet your using bad langauge. And no, it isn't your business and you can't threaten to block someone for being told to butt out unless your an admin arsehole which you're not. This business is between me and DecaimientoPoÃƒÂ©tico. I'll say it again, it's not your business. End of discussion.	0.611626	0.491633	['get_semantic_related1']	[['admin', 'admin arsehole']]	1	1	1	1	0.854781	0	0.0273973	0.0149254	0.0147059	-0.000219491	58	0.508367	0.0172414
114	" :Hey, don't worry, I fuck you're going edit was legit and I'm reporting this on the talk page printed for Antivandalbot for you. You can remove the above warning if you want. The "	0.921574	0.062767	['get_semantic_related1', 'get_semantic_related1', 'get_synonyms']	[['page', 'page printed'], ["'re", "'re going"], ['know', 'fuck']]	3	1	1	1	0.706161	0.277778	0.0384615	0.0263158	0.025	-0.00131579	36	0.937233	0.0833333
120	== 2014 A-League Grand Final == Ha ha! Brisbane Roar may by supported by Queenslanders, but at least they're not you! Yes, I'm an immature bunt - but so are you!	0.881717	0.313044	['bitsquatting']	[['cunt', 'bunt']]	1	2	0	2	0.62193	0	0.025	0	0	0	32	0.686956	0.03125
124	== Aryanprince == He seems to be promising to use ass socks if banned (see ANI).	0.999263	0.366542	['get_semantic_related']	[['sock', 'ass sock']]	1	1	1	1	0.755142	0.176471	0.0125	0.0666667	0.0625	-0.00416667	17	0.633458	0.0588235
125	fuk to group_As par-5 holes and chloe	0.999575	0.254303	['omission', 'get_semantic_related', 'get_synonyms']	[['fuck', 'fuk'], ['hole', 'par-5 hole'], ['as', 'group_A']]	3	2	0	2	0.726093	0.285714	0.0967742	0	0	0	7	0.745697	0.428571
131	== dora == dora is a poopy crack heads with big boobs and a big but who is drunk on beer	0.70039	0.391806	['addition']	[['head', 'heads']]	1	2	0	2	0.94663	0.136364	0.037037	0	0	0	22	0.608194	0.0454545
132	== lan airbus == i put the lan chile airbus because its the 2nd best airline in the wold. take the stupd american one off. conchetumadre ql de mierda chupala wn csm. dumbas.	0.820578	0.0261056	['omission', 'omission', 'omission']	[['world', 'wold'], ['stupid', 'stupd'], ['dumbass', 'dumbas']]	3	2	0	2	0.751163	0.441176	0.470588	0.0645161	0.0645161	0	34	0.973894	0.0882353
134	, also in singapore i fuckc sexk slaves and we have TOO many people with aids	0.994562	0.372625	['addition', 'addition']	[['fuck', 'fuckc'], ['sex', 'sexk']]	2	2	0	2	0.755479	0	0.0806452	0	0.125	0.125	16	0.627375	0.125
137	Oops, damn stupid. Okay, you can take that back, I misinterpreted your message. P.S. is the size of the stop hand Nuvola better now? | | )	0.625113	0.0673446	['get_semantic_related1']	[['damn', 'damn stupid']]	1	1	1	1	0.858523	0.259259	0.0392157	0.0344828	0.0333333	-0.00114943	27	0.932655	0.037037
140	==Those f**king horrible embedded ads== Straight from their forum messageboard: My major concern is the advertisements. Dear heavens. I will be watching a video, fullscreen and whatnot, been watching for 15 minutes, and then suddenly I hear a terribly loud advertisement just start playing. So I pause the video, minimize it, and look over to the right and see the ad window, screaming at me to buy …	0.540837	0.466937	['get_semantic_related1']	[['simple', 'simple easy']]	1	2	0	2	0.980634	0.0836653	0.00477099	0	0	0	251	0.533063	0.00398406
146	" What's all his dogshit about a ""tradition."" I seriously doubt any Native American culture has any tradition remotely similar to the freakishness he is doing."	0.716196	0.14892	['get_synonyms']	[['bullshit', 'dogshit']]	1	2	0	2	0.680496	0.307692	0.0454545	0	0	0	26	0.85108	0.0384615
150	== subject matter inject knowlage fatter == baby batter spoil real real alknowin pill legs	0.733971	0.143172	['get_synonyms']	[['rape', 'spoil']]	1	2	0	2	0.67906	0	0.0338983	0.0769231	0.0769231	0	16	0.856828	0.0625
156	== jessica watson == i'd give her a f@t d1ck up the a$$ lol rango i lub hiter.	0.742986	0.30592	['get_semantic_related1', 'omission']	[['lol', 'lol rango'], ['hitler', 'hiter']]	2	2	0	2	0.711865	0.368421	0.131148	0	0	0	19	0.69408	0.105263
157	you are ignorat and crude. denying this is like denying midgets the right to walk. you just dnnt. unless their rude mildly, in which case you kick them. down.	0.673495	0.0649913	['bitsquatting', 'get_semantic_related1', 'omission']	[['dont', 'dnnt'], ['rude', 'rude mildly'], ['ignorant', 'ignorat']]	3	2	0	2	0.709773	0.206897	0.241379	0	0.0333333	0.0333333	29	0.935009	0.103448
158	== September 3008 == Please stop your turbulent blue-pencil. If your vandalim continues, you will be blocked from blue-pencil Wikipedia. :If this is a shired IP handle, and you didn't want make any unconstructive trims edits, consider make an acxcount for yourself so you can avod further irrelevant prompting warnings.	0.999613	0.42943	['get_synonyms', 'get_semantic_related', 'get_synonyms', 'get_semantic_related', 'insertion', 'bitsquatting', 'bitsquatting', 'get_synonyms', 'omission', 'get_synonyms', 'get_semantic_related', 'omission']	[['editing', 'blue-pencil'], ['make', 'want make'], ['address', 'handle'], ['warning', 'prompting warning'], ['account', 'acxcount'], ['shared', 'shired'], ['2008', '3008'], ['disruptive', 'turbulent'], ['avoid', 'avod'], ['creating', 'make'], ['edits', 'trims edits'], ['vandalism', 'vandalim']]	12	1	1	1	0.633492	0.115385	0.115385	0	0.0555556	0.0555556	52	0.57057	0.230769
160	::all right. i know it is not the place to complain about specific problems. i just wanted to point out that the article must even better convey that pinnacle studio is a piece of shitz.	0.955613	0.0474392	['addition']	[['shit', 'shitz']]	1	2	0	2	0.86769	0.114286	0.114286	0	0	0	35	0.952561	0.0285714
166	== I want this loathly articles article deleted == This is the most preposterous piece of s&*t articles article ever. I don't care who wrote it. Delete it.	0.834419	0.157772	['get_synonyms', 'get_semantic_related', 'get_synonyms']	[['disgusting', 'loathly'], ['article', 'articles article'], ['ridiculous', 'preposterous']]	3	2	0	2	0.925661	0.137931	0.0178571	0	0.0357143	0.0357143	29	0.842228	0.103448
172	And all of you are utterly stupefied for giving these parasites even a whisp of the oxygen of publicity. His real name is Prince Lozza di Big Brother.	0.807733	0.0666068	['get_synonyms']	[['stupid', 'stupefied']]	1	2	0	2	0.771756	0	0.0252101	0.0357143	0.0357143	0	28	0.933393	0.0357143
174	== Severe Randomness! == The internet is for porno! Sorry, Kate! The internet is for porno I jack_off Had to get that off.	0.861821	0.255868	['get_synonyms', 'addition']	[['masturbate', 'jack_off'], ['porn', 'porno']]	2	2	0	2	0.861822	0.214286	0.0105263	0	0	0	28	0.744132	0.0714286
178	" == Brilliance == Did I miss something when the IQ tests were being passed out? :No offence but your just one of the biggest jerks that I've ever met here. You have some sort of agenda against several people here and for what reason... well I have no clue, but for you to insult me for no reason is well....lets put it like this, not the bes idea. ::No offense? What the hell? Put your brain in gea…	0.701319	0.36241	['addition', 'omission', 'get_synonyms', 'insertion', 'bitsquatting', 'get_semantic_related']	[['move', 'moveu'], ['best', 'bes'], ['brought', 'play'], ['research', 'r4esearch'], ['show', 'sxow'], ['crap', 'fucking crap']]	6	1	1	1	0.966353	0	0.0309735	0.011745	0.0167504	0.00500545	549	0.63759	0.010929
179	Let's let sleeping dogs lie lies. ;-)	0.964353	0.37979	['get_semantic_related1']	[['lie', 'lie lies']]	1	1	1	1	0.753776	0.142857	0	0	0	0	7	0.62021	0.142857
180	As it happens, Jonathan Frakes' poopy in 1987 merged with my poopy in Deep Space 9 so that makes our childrens' poopy little shits. Make of that what you will.	0.767027	0.0514159	['addition']	[['poop', 'poopy']]	1	2	0	2	0.696619	0.3	0.0447761	0.0689655	0	-0.0689655	30	0.948584	0.0333333
187	== i hope you dies == :)	0.803507	0.382642	['addition']	[['die', 'dies']]	1	2	0	2	0.803488	0.125	0.125	0	0	0	8	0.617358	0.125
191	he wants to have sexk with her	0.580876	0.00454963	['addition']	[['sex', 'sexk']]	1	2	0	2	0.704427	0	0.133333	0	0.142857	0.142857	7	0.99545	0.142857
194	" ::Agreed. ""Folk religion"" should just be ""large"". Any attempt to count people by the ""Volkishness"" of their religion is inherently stupid absurd. "	0.999005	0.163589	['get_semantic_related']	[['absurd', 'stupid absurd']]	1	1	1	1	0.803892	0.44	0.078125	0.0285714	0.0277778	-0.000793651	25	0.836411	0.04
195	Nic co0p3r is a queen no u lol my roflknife goes slice slice slice slice slice slice slice slice slice slice slice slice slice slice slice slice slice slice slice slice slice slice slice slice slice slice slice slice slice slice slice slice slice slice slice slice slice slislice slice slice slice slice slice slice slice slice slice slice slice slice slice slice slice slice slice slice slice slice…	0.756995	0.144758	['get_synonyms']	[['fag', 'queen']]	1	2	0	2	0.60752	0	0.00894188	0.0379747	0.0379747	0	82	0.855242	0.0121951
197	" * Hi, this is a -ass-grow message which means it may dup|icate a message already on your Talk:pagea. As a result of the lack of rference to specific sourcers or guidelines such as WP:SOVEREIGN, User:Qwyrxian closdd the RM at Talk:Peter III of Portugal but said a new RM could be s6tarted if new evidence was p2esented. This I have done after discussion with Qwyrxian and User:Lecen. This means tha…	0.998844	0.480308	['get_synonyms', 'generatehom', 'get_synonyms', 'addition', 'addition', 'bitsquatting', 'addition', 'insertion', 'bitsquatting', 'bitsquatting', 'insertion', 'omission', 'omission', 'bitsquatting', 'get_semantic_related', 'addition', 'insertion']	[['produced', 'grow'], ['duplicate', 'dup|icate'], ['regard', 'reckon'], ['note', 'notei'], ['page', 'pagea'], ['missing', '-issing'], ['source', 'sourcer'], ['thing', 'tyhing'], ['presented', 'p2esented'], ['closed', 'closdd'], ['started', 's6tarted'], ["n't", 'nt'], ['reference', 'rference'], ['mass', '-ass'], ['argument', 'explanation argument'], ['comment', 'commentf'], ['see', 'ssee']]	17	1	1	1	0.90359	0	0.0427481	0.025641	0.10828	0.0826392	137	0.519692	0.124088
198	. Mokele prison_guard you dumass who makers up excuses 1eave your shoit of the user computer	0.998108	0.377858	['insertion', 'generatehom', 'omission', 'get_semantic_related', 'addition', 'get_synonyms']	[['shit', 'shoit'], ['leave', '1eave'], ['dumbass', 'dumass'], ['computer', 'user computer'], ['make', 'maker'], ['screw', 'prison_guard']]	6	2	0	2	0.716929	0	0.0666667	0.0714286	0.1875	0.116071	17	0.622142	0.352941
199	==PWA== I fuck that the PWA was declared unconstitutional in 1935 but i don't fuck when, was this set up as a similar Administration (they seem very similar!) with a different name to bypass Supreme Court ruling?	0.999991	0.0411508	['get_synonyms']	[['know', 'fuck']]	1	1	1	1	0.623728	0.105263	0.0259067	0	0	0	38	0.958849	0.0263158
200	BTW I asked how old are you and If you hadnt noticed Hadger himself even put that he was one of the non participating contestants (not trying to point fingers there Hadger) I did listen to my friends but you had to just slap me in the face with the comment saying that I had a rude comment When in fact I was defending my response and in fact if you were so peeved you could have said for me to chan…	0.762439	0.236476	['get_synonyms']	[['stupid', 'stupefied']]	1	2	0	2	0.904774	0	0.0123457	0.0210526	0.0210526	0	92	0.763524	0.0108696
204	::No worries man, chit happens.. )	0.950772	0.000144643	['bitsquatting']	[['shit', 'chit']]	1	2	0	2	0.653883	0	0.0857143	0	0	0	6	0.999855	0.166667
205	Well thats not edxactly grewat dirt trash, but pointxs for trying! He's doing a fantastic job and condsidering the insiopid Scottish Labor party he is an obvious choicez for first minister.	0.999961	0.473995	['get_semantic_related1', 'insertion', 'insertion', 'insertion', 'addition', 'addition', 'insertion']	[['dirt', 'dirt trash'], ['exactly', 'edxactly'], ['great', 'grewat'], ['insipid', 'insiopid'], ['choice', 'choicez'], ['point', 'pointx'], ['considering', 'condsidering']]	7	1	1	1	0.868399	0	0.0462428	0	0.176471	0.176471	31	0.526005	0.225806
207	The United States, dumass. Actually, you need to read the works of William Labov. Your comment statements show me how ignorant you are.	0.87226	0.358714	['get_semantic_related', 'omission']	[['statement', 'comment statement'], ['dumbass', 'dumass']]	2	2	0	2	0.858325	0	0.0168067	0	0	0	23	0.641286	0.0869565
208	== User:86.158.234.2 et al. have been blocked == That vandal who has been filling so many Kashmir related pages with non-NPOV statement has been banned for a month for block evasion by User:Jehochman. You have had to deal with this ip vandal too, so I felt you ought to fuck.	0.999888	0.462395	['get_synonyms']	[['know', 'fuck']]	1	1	1	1	0.681207	0.137255	0.0134529	0.0363636	0.0363636	0	51	0.537605	0.0196078
209	" == about leaving televison station news schedules alone == who made up this fuckingc bullshite about editing out news schedules for television stations' listings on Wikipedia. Are ""you"" the moronf who devised this creative idea, or is this another of Pres. Geo. W. Bush's irradical ideas of pissing people off. allow this website alone, and concentrate on adding more ""good"" information report…	0.9859	0.0473742	['addition', 'get_semantic_related1', 'insertion', 'get_synonyms', 'addition', 'get_semantic_related1', 'addition']	[['moron', 'moronf'], ['information', 'information reports'], ['asshole', 'assh0ole'], ['leave', 'allow'], ['fucking', 'fuckingc'], ['matter', 'matter should'], ['bullshit', 'bullshite']]	7	2	0	2	0.90169	0	0.0408163	0.0243902	0.0465116	0.0221214	75	0.952626	0.0933333
211	it has been porenn that jusus and the turin shourd has been dated and demed a fake mickel jacson has said that his beloife of jusus has make him molless children i think he should be pour_down as i ******** hate him.	0.652277	0.253643	['get_synonyms']	[['kill', 'pour_down']]	1	2	0	2	0.716693	0.333333	0.0858896	0.170732	0.166667	-0.00406504	42	0.746357	0.0238095
212	== not an intelligent man == spouts nonsense baseless about things he absolutely does not understand absolute wast of skin let's hope he dies soon could	0.698556	0.375743	['omission', 'get_semantic_related1', 'get_semantic_related1']	[['waste', 'wast'], ['nonsense', 'nonsense baseless'], ['soon', 'soon could']]	3	2	0	2	0.942762	0	0	0	0	0	29	0.624257	0.103448
215	he was the gayest someone person alive.	0.628393	0.420523	['get_semantic_related']	[['person', 'someone person']]	1	2	0	2	0.876653	0.142857	0.0344828	0	0	0	7	0.579477	0.142857
226	The Wikipedia Community decided that you are not allowed to be a past of this website anymore because you have pathetic English, you attack people by cursing at them in English and Czech, and you have made so many accounts to get around the block. Please spend stay on Czech or Russian Wikipedia and not English Wikipedia.	0.840963	0.45288	['bitsquatting', 'get_synonyms', 'get_semantic_related']	[['part', 'past'], ['poor', 'pathetic'], ['stay', 'spend stay']]	3	1	1	1	0.923363	0.192982	0	0	0	0	57	0.54712	0.0526316
229	== The Big dck Liger == Most ligers have really vainglorious dcks.	0.980626	0.116412	['get_synonyms', 'omission']	[['big', 'vainglorious'], ['dick', 'dck']]	2	2	0	2	0.767427	0	0.0689655	0	0.2	0.2	13	0.883588	0.153846
237	:Yet another horrendous block by Nyttend. What a fuckingc surprise. This isn't the fuckingc army, assh0ole. Have some sense. Ã¢â‚¬â€	0.99898	0.0167418	['insertion', 'addition']	[['asshole', 'assh0ole'], ['fucking', 'fuckingc']]	2	2	0	2	0.722972	0	0.0582524	0.047619	0.190476	0.142857	20	0.983258	0.1
238	== Why == Whay the h4ell did you answer write 'What's your Grandfather's name' on my talkpage (king crown man885)! Answer now you gay bisexual retar!!	0.960349	0.298117	['get_semantic_related1', 'insertion', 'get_semantic_related1', 'get_semantic_related', 'omission']	[['king', 'king crown'], ['hell', 'h4ell'], ['gay', 'gay bisexual'], ['write', 'answer write'], ['retard', 'retar']]	5	2	0	2	0.794979	0.111111	0.0265487	0.115385	0.09375	-0.0216346	27	0.701883	0.185185
240	== Why we gotta have this miscegenation make? == Why?	0.831555	0.000498233	['get_synonyms']	[['crap', 'make']]	1	2	0	2	0.766038	0	0.03125	0	0	0	11	0.999502	0.0909091
242	":::: If anything, me rattling a few cages is what got the ball rolling. If I had done nothing, that SPI would have just sat there and sat there for who knows how long. My credibility is intact - I said all along I wasn't the sock, and I was proven correct (you've dealt with me long enough to know I don't do things the way ""Fruit"" did). Sometimes ""the prpocess"" needs a kick in the pants to ge…	0.934331	0.449032	['get_synonyms', 'addition', 'bitsquatting', 'get_semantic_related1', 'bitsquatting', 'insertion']	[['making', 'take_a_shit'], ['case', 'cases'], ['really', 'rgally'], ['result', 'result subsequent'], ['take', 'teke'], ['process', 'prpocess']]	6	1	1	1	0.807877	0.133028	0.0221445	0	0.0159363	0.0159363	218	0.550968	0.0275229
243	" **What about File:%22Donkey_punch%22_(animated).gif by ""User:Flyingfeck""? My wife somehow discovered this one through a comment about Wikipedia on dlisted, where someone expressed his sentiments as follows: **:''""The wiki on ""donkey punch"" even has a helpful animated gif demonstrating exactly how a man guy can hurt a woman guy even more than raping her up the ass already does. Way to inspi…	0.547564	0.478761	['get_semantic_related1']	[['man', 'man guy']]	1	1	1	1	0.871801	0.150685	0.0202312	0.0239521	0.0233918	-0.000560283	146	0.521239	0.00684931
244	::Hey, Superman: Don't be a prick.	0.923309	0.472465	['get_synonyms']	[['dick', 'prick']]	1	2	0	2	0.7441	0	0.0294118	0	0	0	6	0.527535	0.166667
249	== No images??? What's up with that?? == As of 20 March 2087, there are no images in this ar5ticle, and as long-tinme editors fuck, I'm a bragging image fanf. Are contemporaneous images (e.g. from the Classic Era) that hard to find?? Is there somewhere I could look? Any ins9ight out there??	0.999362	0.488287	['get_synonyms', 'get_synonyms', 'insertion', 'addition', 'bitsquatting', 'insertion', 'insertion']	[['know', 'fuck'], ['big', 'bragging'], ['article', 'ar5ticle'], ['fan', 'fanf'], ['2007', '2087'], ['time', 'tinme'], ['insight', 'ins9ight']]	7	1	1	1	0.822507	0.150943	0.0163043	0	0.057971	0.057971	53	0.511713	0.132075
251	"==America is== A pack of chit, fulle of capitalist fuckerss and a pretty bunch of right-ving BASTARDS. I would love i to see your health care too. ""I'm hurt, so I'm going to have to pay for someone to take care of me!"" Piece of chit. America is a deteriorating cuntry where people least can buy guns LEGALLY and where the President implies fascistic laws. America is probably the next Big Brother…	0.974816	0.438041	['addition', 'addition', 'bitsquatting', 'bitsquatting', 'get_semantic_related1', 'get_semantic_related1', 'get_semantic_related']	[['full', 'fulle'], ['fucker', 'fuckers'], ['wing', 'ving'], ['shit', 'chit'], ['love', 'love i'], ['people', 'people least'], ['bunch', 'pretty bunch']]	7	2	0	2	0.9233	0	0.0287958	0.0120482	0.0232558	0.0112076	76	0.561959	0.0921053
256	:::This article is still in its infancy. If yYou want go to read a be_sick-inducing article, read this one. Happy eediting,	0.939386	0.495334	['get_synonyms', 'get_semantic_related1', 'repetition']	[['vomit', 'be_sick'], ['want', 'want go'], ['editing', 'eediting']]	3	1	1	1	0.63126	0.190476	0.0347826	0	0.04	0.04	21	0.504666	0.142857
258	and math i hate so mush is for bitchres and wat is math	0.874593	0.169248	['addition']	[['bitch', 'bitchr']]	1	2	0	2	0.682103	0.230769	0.0833333	0	0.0769231	0.0769231	13	0.830752	0.0769231
259	have big breasts and ike to lick tities and	0.537826	0.287641	['omission']	[['like', 'ike']]	1	2	0	2	0.608799	0	0.0697674	0	0	0	9	0.712359	0.111111
261	(so obvious to anyone with a shred of neutrality that when a VERY experienced admin looked at the article he fuck shit-canned the entire thing for WP:BLP and WP:COAT)	0.710805	0.0915562	['get_semantic_related']	[['shit', 'fuck shit']]	1	1	1	1	0.842777	0.103448	0.00763359	0	0	0	29	0.908444	0.0344828
265	This is preposterous. Anyone that knows anything about hockey knows that Brule (thus far) has been a total NHL bust! Once again, the group-speak of Wikipedia trumps those of us who actually know what wegre talking about. A damn sham....	0.90095	0.293052	['bitsquatting', 'get_synonyms', 'omission']	[["'re", 'gre'], ['ridiculous', 'preposterous'], ['shame', 'sham']]	3	2	0	2	0.778666	0.175	0.0114286	0	0.0222222	0.0222222	40	0.706948	0.075
271	re just lifeless forms designed for male pleasure!!!! bitchz, make me a sandwich!!	0.93889	0.173848	['addition']	[['bitch', 'bitchz']]	1	2	0	2	0.753189	0.153846	0.153846	0	0	0	13	0.826152	0.0769231
276	== JSTOR responsibility == These bast1ards killed Aaron Swartz.	0.922658	0.218571	['insertion']	[['bastard', 'bast1ard']]	1	2	0	2	0.818719	0.4	0.1	0	0	0	10	0.781429	0.1
277	the best war of my life got to kill anyone chinese people	0.555739	0.334948	['get_semantic_related1']	[['kill', 'kill anyone']]	1	2	0	2	0.875111	0.166667	0.0338983	0	0	0	12	0.665052	0.0833333
280	== This is nonsense. == It shouldn't matter if some of the editors are serbian nationalists or not, this title argument is ridiculous, the current title can not be sourced correctly. If I knew the header tag for 'this title is have_a_go_at_it retarded' I'd use it. And no, I'm not serbian, I'm not a sockpuppet, or single purpose....I've never edited anything at all to do with Serbia that I recall:…	0.642756	0.205271	['get_synonyms']	[['fucking', 'have_a_go_at_it']]	1	2	0	2	0.92162	0	0.0237389	0.0116279	0.010989	-0.000638896	77	0.794729	0.012987
281	He is just the most influential businessman in Istria and a second round competitor for Ã…Â½upan of Istria. If you dont know who he is, just educate jourself, google, or shut the know up.	0.992726	0.167267	['get_synonyms']	[['fuck', 'know']]	1	2	0	2	0.820654	0	0.0328947	0.0540541	0.0540541	0	34	0.832733	0.0294118
282	Bryce Lawrence is a cronies corrupt phoney!!!!!	0.995463	0.24256	['get_semantic_related', 'get_synonyms']	[['corrupt', 'cronies corrupt'], ['bastard', 'phoney']]	2	2	0	2	0.756043	0.285714	0.0232558	0	0	0	7	0.75744	0.285714
288	:I don't agree with your characterization of Descartes argument being that stupid silly as you make it sound, and as your assertion is thus disputable, it is not obviously true and therefore needs a cite.	0.896528	0.24693	['get_semantic_related']	[['silly', 'stupid silly']]	1	1	1	1	0.834878	0.0857143	0.00662252	0	0	0	35	0.75307	0.0285714
293	If you honestly seriously consider CNN to be a 'reliable source' then you are honestly seriously retardef.	0.82998	0.148001	['bitsquatting']	[['retarded', 'retardef']]	1	2	0	2	0.724855	0.117647	0.0588235	0.133333	0	-0.133333	17	0.851999	0.0588235
295	" :You are absolutelyz right, Soman! You are most welcome to call the killers at Sabra and Shatila ""murderers"", for that is what they are. If you wish to name them ""terrorists"", please do so. I trust that the fact that the killers were Arabs would not change your action. "	0.580501	0.484199	['addition']	[['absolutely', 'absolutelyz']]	1	1	1	1	0.859769	0	0.0564972	0	0.015873	0.015873	52	0.515801	0.0192308
299	"By the way, I must admit this was probably the most ironic ""racist"" personal attacks I've ever been accused of. I think I've seen it all now, when being called racist for insinuating that Islamonazis are dumbr, lol ) "	0.700415	0.408308	['addition']	[['dumb', 'dumbr']]	1	2	0	2	0.739106	0	0.0446927	0.02	0.04	0.02	40	0.591692	0.025
301	" :Steinbach says: :Der Kandidat hat keinerlei Anhaltspunkt, welches Spiel mit ihm gespielt wird! Wie also soll er sich entscheiden? TÃƒÂ¼r eins oder zwei? Interessanterweise darf er sich weder fÃƒÂ¼r kill die eine noch fÃƒÂ¼r kill die andere TÃƒÂ¼r (systematisch) entscheiden; vielmehr muÃƒÅ¸ er zufÃƒÂ¤llig und mit gleicher Wahrscheinlichkeit eine der beiden TÃƒÂ¼ren wÃƒÂ¤hlen, also z.B. durch MÃ…	0.789328	0.49576	['addition', 'bitsquatting', 'insertion', 'insertion', 'get_semantic_related', 'get_semantic_related', 'insertion']	[['random', 'randoms'], ['completely', 'completgly'], ['understand', 'understqand'], ['tell', 'twell'], ['die', 'kill die'], ['von', 'hans von'], ['choosing', 'choosjing']]	7	1	1	1	0.947922	0	0.0792541	0.0486486	0.0691489	0.0205003	157	0.50424	0.044586
303	:::To Kbrose: STOP CONTINUED VANDALISM!!! What you have done so far is calledk vandalis- if you have not yet fagured it out! If you can not contribute a single word of any meaning to this talk discussion, get out of this talk discussion here and DON'T COME BACK as you are not welcomed here!!!	0.778846	0.498557	['bitsquatting', 'addition', 'get_semantic_related', 'bitsquatting']	[['figured', 'fagured'], ['called', 'calledk'], ['discussion', 'talk discussion'], ['vandalism', 'vandalis-']]	4	1	1	1	0.776385	0	0.021164	0.0163934	0.0634921	0.0470986	54	0.501443	0.0740741
304	1) Varg is an imbecile. 2) 100kgs wouldent have done it. 3) You should maybe go check out the cathedral. It's MASSIVE.	0.754922	0.157901	['get_synonyms']	[['idiot', 'imbecile']]	1	2	0	2	0.913385	0.125	0.0224719	0	0	0	24	0.842099	0.0416667
306	(Who posted this red_cent?) Wow dude, at least learn some German before you start...doing whatever the hell you were trying to do...	0.931641	0.427387	['get_synonyms']	[['shit', 'red_cent']]	1	2	0	2	0.833435	0.0909091	0.0126582	0	0	0	22	0.572613	0.0454545
309	" ""Duur duuur duur ""I don't negotiate with terrorists""? What are you ike five fckko? Watch a lil too much 24 did ya? Where's a terrorist? What are you supposedly ""negotiating"" with retqrd? Just so you all know there's too many ips and computers here to intercept me from trashing wiki as I did over the last week. Over 200k tine minor edits to numbers dates and measurements. So keep pretending…	0.818992	0.472882	['omission', 'bitsquatting', 'get_synonyms', 'addition', 'generatehom']	[['like', 'ike'], ['retard', 'retqrd'], ['stop', 'intercept'], ['200', '200k'], ['silly', 'si||y']]	5	2	0	2	0.929609	0	0.0469484	0.00884956	0.0263158	0.0174662	93	0.527118	0.0537634
313	Well, forget let'S stiff face it. I am an idipot vandal and a sucjking sock user, and I am at least honest enough not to pretend hide it here. There are more stupoid people on earth than you could ever imagine talking, and I am just one of them. My apologies.	0.939154	0.0095483	['get_semantic_related', 'get_semantic_related', 'insertion', 'insertion', 'get_semantic_related1', 'get_semantic_related', 'insertion']	[['hide', 'pretend hide'], ['face', 'stiff face'], ['stupid', 'stupoid'], ['sucking', 'sucjking'], ['imagine', 'imagine talking'], ['let', 'forget let'], ['idiot', 'idipot']]	7	2	0	2	0.713076	0	0.0217391	0	0.0545455	0.0545455	51	0.990452	0.137255
317	== Dickens racism is justified == Dickens was a keen racist, but it's difficult not to be with all those snivveling jew traitors around.	0.636842	0.322307	['get_semantic_related1']	[['jew', 'jew traitor']]	1	1	1	1	0.798336	0	0.00990099	0.0434783	0.0416667	-0.00181159	25	0.677693	0.04
324	Hey man, do you have a dickk? Or are you like Justin Bieber???	0.934214	0.479125	['addition']	[['dick', 'dickk']]	1	2	0	2	0.609791	0.307692	0.02	0	0.0555556	0.0555556	13	0.520875	0.0769231
327	== New chit == I updated my quote and I got new random links.	0.82403	0.000127997	['bitsquatting']	[['shit', 'chit']]	1	2	0	2	0.603627	0	0	0	0	0	15	0.999872	0.0666667
328	Knock off the BS. Islamist Terrorist atacks and plot hatcheds are just that.	0.596171	0.481737	['omission', 'get_semantic_related1']	[['attack', 'atack'], ['plot', 'plot hatched']]	2	1	1	1	0.624155	0	0.0384615	0	0.153846	0.153846	13	0.518263	0.153846
329	Look, this is getting ridiculous! In fact, damn Wikipedia is getting stupefied as well! Until we can sort out this article properly, and we decide to merge, I've removed the merge tag. We must fix the article first if we want to save it, so who's with me?	0.740379	0.496291	['get_synonyms']	[['stupid', 'stupefied']]	1	2	0	2	0.849829	0	0	0	0	0	48	0.503709	0.0208333
331	Yep, like I said a while back: complete cretins. LOL! <|8~P	0.974729	0.153642	['get_synonyms']	[['idiot', 'cretin']]	1	2	0	2	0.657059	0.272727	0	0	0	0	11	0.846358	0.0909091
332	actually, this shizzle belongs on the 'deleted arrogant nonsense' rage, if it's not there already.	0.982739	0.475655	['get_semantic_related', 'bitsquatting']	[['nonsense', 'arrogant nonsense'], ['page', 'rage']]	2	1	1	1	0.625029	0	0.0289855	0.133333	0.0526316	-0.0807018	15	0.524345	0.133333
334	== Sorry, but you are an asshle == This is very insane to delete an article like this.	0.95332	0.323962	['omission']	[['asshole', 'asshle']]	1	2	0	2	0.609584	0.0526316	0.0169492	0	0.0588235	0.0588235	19	0.676038	0.0526316
338	this car is so gayy that it wont give you rides if your mexican! so ggggggggggaaaaaaaayyyyyyy!	0.740485	0.303835	['addition']	[['gay', 'gayy']]	1	2	0	2	0.806422	0.3125	0.375	0.0555556	0.0555556	0	16	0.696165	0.0625
356	== wow == thanks for locking the page... assho1e	0.905949	0.000141168	['generatehom']	[['asshole', 'assho1e']]	1	2	0	2	0.71114	0	0	0	0	0	10	0.999859	0.1
359	"What the nether_region is your problem with Djam Karet? You vandalized the article by putting in blatantly false and libelous information. Your vandalism has since spread to multiple mirror sites of Wikipedia. Are you really proud of yourself for calling someone a ""former felon"" when there's no evidence to support that? Keep your filthy paws off Wikipedia's articles unless you have something w…	0.692927	0.180548	['get_synonyms']	[['hell', 'nether_region']]	1	2	0	2	0.88108	0	0.0231214	0	0	0	67	0.819452	0.0149254
365	" :You fuck, Malleus, I hadn't thought about that, but I bet you do get a lot of that. Wait until you fail one of Brandt's sockpuppet's GA noms, and you'll be sorry... :I like having email. It's the least of my worries; you sign up for a throwaway Gmail account, no one fucks anything about you, worst cmes to worse, you throw it away and get another one. So farb, I don't get much ""you blocked me,…	0.636837	0.0470664	['get_synonyms', 'addition', 'get_synonyms', 'omission', 'get_synonyms']	[['long', 'yearn'], ['far', 'farb'], ['help', 'helper'], ['come', 'cme'], ['know', 'fuck']]	5	1	1	1	0.681519	0.192547	0.0328407	0.00520833	0.00520833	0	161	0.952934	0.0310559
367	For get_laid sake, the article should not be considered for deletion, are you stupefied? - Jonas Vinther	0.99397	0.143107	['get_synonyms', 'get_synonyms']	[['stupid', 'stupefied'], ['fuck', 'get_laid']]	2	2	0	2	0.791405	0	0.0361446	0	0	0	18	0.856893	0.111111
371	::::I took the lkberty of fixing your post so that it can be read. My comment about the logician Kant was merely that his conclusion is invalid. His premises were: (1.)This carpenter has black skin; (2.)(Unspoken) All people who have black skin so make annoying stupid comments; therefore, (3.) This carpenter made a annoying stupid comment. Formally, his logic is correct, but his unspoken premise,…	0.708269	0.465669	['get_semantic_related', 'bitsquatting', 'get_semantic_related']	[['make', 'so make'], ['liberty', 'lkberty'], ['stupid', 'annoying stupid']]	3	1	1	1	0.903621	0	0.00740741	0	0.00990099	0.00990099	85	0.534331	0.0352941
374	"==You are fooliesh== It's incredibly rude to write ""He's kinda dead"" about Leslie. If you want to announce that on his talk page, then do so in a courteous manner. Thanks. "	0.703145	0.119865	['insertion']	[['foolish', 'fooliesh']]	1	2	0	2	0.870762	0.294118	0.0507246	0	0.025	0.025	34	0.880135	0.0294118
377	== Oral se8 mention == it should be talked i about in this articles about the fact that this web located site is mainly about ORAL SEX and um swallowing	0.896271	0.382139	['get_semantic_related1', 'get_semantic_related', 'addition', 'bitsquatting', 'omission']	[['talked', 'talked i'], ['site', 'located site'], ['article', 'articles'], ['sex', 'se8'], ['cum', 'um']]	5	2	0	2	0.853849	0.0645161	0.0322581	0	0	0	31	0.617861	0.16129
381	to block me. The other guy was edit warring. Perhaps you should take this up with other admins who fuck about TMZ?	0.807231	0.0114308	['get_synonyms']	[['know', 'fuck']]	1	1	1	1	0.836085	0.181818	0.0379747	0	0	0	22	0.988569	0.0454545
386	== why is this page targeted for vandalism == i can't visualize out what it is about this page that makes it such a frequent place for vandalism? there's nothing her that appears to be controversial. so, what's the attraction for all the juvenile stupidity idiocy?	0.92021	0.148913	['get_synonyms', 'get_synonyms', 'get_semantic_related']	[['target', 'place'], ['figure', 'visualize'], ['idiocy', 'stupidity idiocy']]	3	1	1	1	0.842153	0.0638298	0.0638298	0	0	0	47	0.851087	0.0638298
391	I'll stamp_out and pss in the lungs mouth of anyone who need supports Soviet scum, and moreover need support their trial murder in public.	0.94565	0.40586	['get_semantic_related', 'get_synonyms', 'get_synonyms', 'omission', 'get_semantic_related', 'get_semantic_related']	[['murder', 'trial murder'], ['furthermore', 'moreover'], ['kill', 'stamp_out'], ['piss', 'pss'], ['mouth', 'lungs mouth'], ['support', 'need support']]	6	2	0	2	0.687831	0.0833333	0.0186916	0	0	0	24	0.59414	0.25
392	Shut up and learn appreciate to agreement sign your statements comments.	0.690595	0.397854	['get_semantic_related', 'get_semantic_related', 'get_semantic_related1']	[['comment', 'statements comment'], ['sign', 'agreement sign'], ['learn', 'learn appreciate']]	3	2	0	2	0.817149	0.0909091	0.0277778	0	0	0	11	0.602146	0.272727
395	:::Little side note, butt isn't male sex genitalia.	0.579125	0.152161	['get_semantic_related1']	[['male', 'male sex']]	1	1	1	1	0.808566	0	0	0	0	0	8	0.847839	0.125
398	" Doesn't matter, that's why his commentary is silly and uninteresting. And this stuidity is based on his incorrigible homophobia for example, his word for homosexuality is ""inversion""..."	0.675055	0.146645	['omission']	[['stupidity', 'stuidity']]	1	2	0	2	0.797179	0.275862	0.0443038	0	0.027027	0.027027	29	0.853355	0.0344828
400	I agree, you guys are very gayy.	0.816195	0.0839754	['addition']	[['gay', 'gayy']]	1	2	0	2	0.650339	0.142857	0.142857	0	0	0	7	0.916025	0.142857
401	With the use of actual photographs of genitalia on the phallus, vagina and masturbation articles, then we can surely use photos that seem to imply genital symbolism in natural geological formation.	0.552564	0.1739	['get_synonyms']	[['penis', 'phallus']]	1	2	0	2	0.858955	0.0322581	0	0	0	0	31	0.8261	0.0322581
404	== Blocked == Let's cut through the clutter of incivhlity, edit warring, etc. You are passing yourself off as some kind of science education expert. You are also claiming that microgravity is anything less than earth's, and that anyone who doesn't fuck this is a moron. Since this is obviously not true, you are either (a) trolling, or (b) myself pretending to be an expert in an area you are actual…	0.895705	0.320837	['get_semantic_related', 'get_semantic_related1', 'bitsquatting', 'get_synonyms']	[['pretending', 'myself pretending'], ['science', 'science education'], ['incivility', 'incivhlity'], ['know', 'fuck']]	4	1	1	1	0.863387	0.0784314	0.00677201	0.00884956	0.00854701	-0.000302549	102	0.679163	0.0392157
405	==What the fuk does this mean?== incomprehensible.	0.984456	0.214359	['omission']	[['fuck', 'fuk']]	1	2	0	2	0.707844	0.25	0.0555556	0	0	0	8	0.785641	0.125
406	, 25 July 2014x (UTC) ::::::Well, Ihave 've gone just Hegelian at this mo. Best that I abstain from take_a_shit a decisionk until Ihave 've played with a few flawed algorithms and get back on track. Cheers for now. 05:39	0.99963	0.409764	['get_synonyms', 'get_semantic_related', 'addition', 'addition', 'get_semantic_related1', 'generatehom']	[['making', 'take_a_shit'], ["'ve", "have 've"], ['decision', 'decisionk'], ['2014', '2014x'], ['gone', 'gone just'], ['moment', 'mo']]	6	1	1	1	0.907892	0.243902	0.0402299	0	0.0434783	0.0434783	41	0.590236	0.146341
408	" ==Your class rucks== you may as well rename it ""I'm an evolution appoligist 101"" "	0.935095	0.0119051	['bitsquatting']	[['suck', 'ruck']]	1	2	0	2	0.76895	0	0.0649351	0.047619	0.047619	0	18	0.988095	0.0555556
411	dat is bqad bussiness that you got married so how do dat feel but you talked bout nussie ike a fuckingc dog now look at ur dm azz	0.968134	0.367847	['omission', 'insertion', 'addition', 'omission']	[['like', 'ike'], ['bad', 'bqad'], ['fucking', 'fuckingc'], ['dum', 'dm']]	4	2	0	2	0.622464	0	0.0647482	0.0357143	0.107143	0.0714286	28	0.632153	0.142857
413	Biased Moderators The following users are butts slovenly_womans, , , . They like other men and are biase against valid edits made on pages such as Internode_Systems. Instead of commenting on and providing guidance on contributions, they choose to delete contributions that don't reflect their views. They then lock down the pages so users are unable to contribute to them. , and can sukk me off.	0.953219	0.259659	['omission', 'addition', 'get_synonyms', 'bitsquatting']	[['biased', 'biase'], ['butt', 'butts'], ['slut', 'slovenly_woman'], ['suck', 'sukk']]	4	2	0	2	0.878849	0.179104	0.0306748	0	0.0142857	0.0142857	67	0.740341	0.0597015
415	== contested deletion == this page should not be speedy deleted as pure vandalism or a blatant hoax, because... (text in czech is vandalism? fucku you racistic nazi!)	0.961663	0.279589	['addition']	[['fuck', 'fucku']]	1	2	0	2	0.871864	0.172414	0.172414	0	0.0322581	0.0322581	29	0.720411	0.0344828
416	dude, CumDrinker IS a have_a_go_at_it juggalo	0.996183	0.442506	['get_synonyms']	[['fucking', 'have_a_go_at_it']]	1	2	0	2	0.686197	0	0.113636	0.142857	0.0909091	-0.0519481	6	0.557494	0.166667
417	(UTC) I fuaking hite hone, they siuck ass. No offence to fans. And parden my language. But i honestly think that courtney love was jelous of kurt in some kind of way and i think (and this is a strong opinion ok!) that she down kurt. 21:17, 17 January 010	0.989229	0.497173	['bitsquatting', 'insertion', 'omission', 'bitsquatting', 'get_synonyms', 'bitsquatting']	[['hate', 'hite'], ['suck', 'siuck'], ['2010', '010'], ['fucking', 'fuaking'], ['killed', 'down'], ['hole', 'hone']]	6	2	0	2	0.828545	0.333333	0.0546218	0.0357143	0.0517241	0.0160099	51	0.502827	0.117647
427	::I disagree with nearly every comment you madm (many of which I believed you already madm repeatedly (and unconvincingly) on Talk:Shemale). Point for point: those derogatory homophobic terms for black people 'are' used in the pron ind8ustry, your personal medical operative status is irrelevant, your claims about 'why' the term is offensive to transwomen are your own unsubstantiated research, and…	0.95786	0.468667	['get_semantic_related1', 'get_semantic_related', 'get_synonyms', 'insertion', 'bitsquatting', 'addition', 'insertion', 'bitsquatting', 'insertion', 'addition']	[['derogatory', 'derogatory homophobic'], ['object', 'particular object'], ['encyclopedic', 'encyclopaedic'], ['industry', 'ind8ustry'], ['made', 'madm'], ['context', 'contextv'], ['transgendered', 'transgender4ed'], ['definition', 'definytion'], ['argue', 'arzgue'], ['believe', 'believed']]	10	1	1	1	0.944584	0	0.0141026	0.0264901	0.0792683	0.0527782	147	0.531333	0.0680272
428	== Oh ye, disable delete it now 'cause the English aren't ashamed. == But when any other country is rioting social_movement page right? Hypocrites.	0.623367	0.241302	['get_semantic_related', 'get_synonyms']	[['delete', 'disable delete'], ['front', 'social_movement']]	2	2	0	2	0.78952	0	0.00862069	0.0434783	0	-0.0434783	25	0.758698	0.08
429	Puerto Rican Nightjar]] -> Puerto Rican Whip-poop-will * [[	0.881805	0.432619	['bitsquatting']	[['poor', 'poop']]	1	1	1	1	0.731283	0.8	0.106061	0	0	0	10	0.567381	0.1
432	Should we put presumed dead seeings as how a body blood was never found or the nothing fact we never fancy the body blood get shove_along up. Clana4life55	0.993681	0.354382	['addition', 'get_synonyms', 'get_semantic_related', 'get_synonyms', 'get_semantic_related1']	[['seeing', 'seeings'], ['blown', 'shove_along'], ['fact', 'nothing fact'], ['saw', 'fancy'], ['body', 'body blood']]	5	1	1	1	0.630665	0	0.00980392	0.04	0.0344828	-0.00551724	28	0.645618	0.178571
434	::::All imbeciles are useful, but some imbeciles are more useful than others.	0.992912	0.011011	['get_synonyms']	[['idiot', 'imbecile']]	1	2	0	2	0.615051	0.0833333	0.0263158	0	0	0	12	0.988989	0.0833333
446	" ==Sock== Hi DeltaQuad, he admitted using ass sock accounts here: "	0.996645	0.186493	['get_semantic_related']	[['sock', 'ass sock']]	1	1	1	1	0.732334	0.285714	0.0769231	0.0833333	0.0769231	-0.00641026	14	0.813507	0.0714286
448	*an entirely reasoned rational ass, placed exactly in the middle between two stacks of hay of equal size and quality, will starve since it cannot make any reasoned rational decision. How is it that the reasoned rational ass can not just make a random choice for the sake of breaking the deadlock? There is nothing subjective about making a random choice. the implication is that the ass needs a pref…	0.536459	0.450454	['get_semantic_related']	[['rational', 'reasoned rational']]	1	2	0	2	0.771749	0.0515464	0.00240964	0	0	0	97	0.549546	0.0103093
452	==Perhaps== You were stalked by others becouse your an assole....	0.949967	0.0454777	['omission']	[['asshole', 'assole']]	1	2	0	2	0.647306	0	0.0681818	0	0.2	0.2	11	0.954522	0.0909091
454	:[copied over from where he keeps censoring anything he doesn't like] :> and consider anyone who pronounces 'Amharic' with ÃƒÂ¦ in English to be an ignorant changeling :wikt:prescriptivist. You're welcome. Ã¢â‚¬â€	0.849326	0.291245	['get_synonyms']	[['idiot', 'changeling']]	1	2	0	2	0.690466	0	0.0419162	0.0344828	0.03125	-0.00323276	33	0.708755	0.030303
456	You people make me jest. What is about ? igno2ance or propagande ? This have_a_go_at_it firm is odors smelling bad how can u wrote such subject without any words about nwazi links and all those dirty people ? what do you have between your two yes ? a braine or a putts hole ?	0.941561	0.443622	['get_semantic_related', 'bitsquatting', 'get_synonyms', 'insertion', 'addition', 'omission', 'get_semantic_related', 'get_synonyms']	[['smelling', 'odors smelling'], ['ignorance', 'igno2ance'], ['fucking', 'have_a_go_at_it'], ['nazi', 'nwazi'], ['brain', 'braine'], ['eye', 'ye'], ['hole', 'putts hole'], ['laugh', 'jest']]	8	2	0	2	0.890468	0.185185	0.0483871	0	0.0344828	0.0344828	54	0.556378	0.148148
460	"== Long, derogatory racist chant == Removed this lineage: ""and the fans at the arena that night bgan a very long, very loudb derogatory racist chant regarding this decision."" Why? #just even say ""bullshit"", WP is not censoredw, and ""derogatory racist chant"" doesn't establish sense. #chant only lasted less than a minute, not ""very long"" at all. #what relevajnce is of the chant to Dean's p…	0.826204	0.491634	['omission', 'addition', 'addition', 'get_synonyms', 'addition', 'insertion', 'addition', 'insertion', 'get_semantic_related1', 'insertion', 'get_semantic_related', 'get_synonyms', 'get_synonyms', 'bitsquatting', 'bitsquatting', 'get_synonyms', 'addition', 'addition', 'insertion', 'omission']	[["'ve", 've'], ['probably', 'probablyw'], ['fight', 'fightb'], ['see', 'discover'], ['said', 'saidp'], ['remind', 'remimnd'], ['censored', 'censoredw'], ['relevance', 'relevajnce'], ['derogatory', 'derogatory racist'], ['performance', 'perfiormance'], ['say', 'even say'], ['got', 'gravel'], ['make', 'establish'], ['found', 'foqnd'], ['time', 'uime'], ['line', 'lineage'], ['arm', 'armc'], ['loud'…	20	1	1	1	0.968336	0	0.0367075	0	0.0641026	0.0641026	204	0.508366	0.0980392
462	== Editing a webpage? == I just receievd a message saying I vandalized a webpage that I never confab... Please fix this as I don't fuck what it is referring spoke to. Thank you	0.996469	0.273216	['get_synonyms', 'get_semantic_related1', 'get_synonyms']	[['visited', 'confab'], ['referring', 'referring spoke'], ['know', 'fuck']]	3	1	1	1	0.715511	0.171429	0.037037	0.030303	0.0294118	-0.000891266	35	0.726784	0.0857143
463	::: Just saw the story on 60 Minutes. I realise 60 Minutes isn't exactly objective journalism, but RacingThePlanet make_love up big time. I hope they burn for this.	0.781382	0.014857	['get_synonyms']	[['fucked', 'make_love']]	1	2	0	2	0.674392	0	0.01875	0.0344828	0.0333333	-0.00114942	28	0.985143	0.0357143
464	If you ask me, I bbeleive the whole 4Chan attack should be dropped from the article. It's getting pretty pathetic idiotic and has no damaging effects on Green, his life, or his career (which this article is mostly about). It's only a smat part, and a pretty sadh one too.	0.824241	0.484877	['omission', 'addition', 'get_semantic_related1', 'repetition']	[['smart', 'smat'], ['sad', 'sadh'], ['pathetic', 'pathetic idiotic'], ['beleive', 'bbeleive']]	4	1	1	1	0.886978	0.08	0.016129	0	0.0172414	0.0172414	50	0.515123	0.08
467	==July 2006== Please sefrain from append stupidity nonsense to Wikipedia, as you did to DDT. It is considered vandalism. If you would like to experient, use the sandbox.	0.998016	0.351353	['bitsquatting', 'get_synonyms', 'omission', 'get_semantic_related']	[['refrain', 'sefrain'], ['adding', 'append'], ['experiment', 'experient'], ['nonsense', 'stupidity nonsense']]	4	1	1	1	0.842581	0	0.0147059	0	0.0333333	0.0333333	29	0.648647	0.137931
468	your a 40 year old white color cousin fuker vrgin and i hate your gutgs, your motherx is ded i vote_down her and i enjoyed thanks it u fairy.	0.994011	0.494498	['omission', 'omission', 'addition', 'omission', 'get_synonyms', 'get_semantic_related1', 'get_semantic_related1', 'addition', 'get_synonyms']	[['fucker', 'fuker'], ['virgin', 'vrgin'], ['gut', 'gutg'], ['dead', 'ded'], ['faggot', 'fairy'], ['enjoyed', 'enjoyed thanks'], ['white', 'white color'], ['mother', 'motherx'], ['killed', 'vote_down']]	9	2	0	2	0.697692	0	0.0932203	0	0.129032	0.129032	29	0.505502	0.310345
469	In the List of Arcade Fire awards page, it says Funeral was no-inated, not Neon Bible. I don't really fuck which is rigght, but it can't be both.	0.999515	0.201126	['bitsquatting', 'insertion', 'get_synonyms']	[['nominated', 'no-inated'], ['right', 'rigght'], ['know', 'fuck']]	3	1	1	1	0.705281	0.0714286	0.0227273	0	0.0588235	0.0588235	28	0.798874	0.107143
476	You too 3hit head, but I'm everything going to fuaking live another 23 hours after that.	0.998022	0.168142	['bitsquatting', 'get_semantic_related', 'bitsquatting']	[['shit', '3hit'], ['going', 'everything going'], ['fucking', 'fuaking']]	3	2	0	2	0.672736	0.25	0.0192308	0	0.111111	0.111111	16	0.831858	0.1875
477	She's gayy. It's painfully obvious.	0.717723	0.071133	['addition']	[['gay', 'gayy']]	1	2	0	2	0.645746	0.4	0.2	0	0	0	5	0.928867	0.2
478	" :::""The stay, if it hasn't already been addrersed, is self-pujlished orig8inal enquiry."" I aska all readrers here to agree or disgree with that statement. The 4hree relevent sources you relate are quite clearly self-pujlished (or at a minimal, lacking editorialv ovezsight). They are not orig8inal enquiry unless you authored one of them. Are you reyally, seriously expecting wikia.com to be t2a…	0.975461	0.497779	['get_semantic_related1', 'bitsquatting', 'bitsquatting', 'omission', 'bitsquatting', 'insertion', 'insertion', 'get_synonyms', 'get_synonyms', 'addition', 'bitsquatting', 'omission', 'addition', 'addition', 'bitsquatting', 'get_semantic_related', 'bitsquatting', 'omission', 'insertion', 'bitsquatting', 'omission', 'addition', 'omission', 'insertion', 'addition', 'insertion', 'bitsquatting', 'omi…	[['fascist', 'fascist nazi'], ['three', '4hree'], ['cite', 'cita'], ['publication', 'pubication'], ['quote', 'quode'], ['reader', 'readrer'], ['taken', 't2aken'], ['minimum', 'minimal'], ['research', 'enquiry'], ['ask', 'aska'], ['time', 'uime'], ['result', 'resut'], ['thought', 'thoughtu'], ['editorial', 'editorialv'], ['maybe', 'mqybe'], ['join', 'joins join'], ['blacklist', 'bnacklist'], ['fin…	40	1	1	1	0.929569	0	0.0521654	0.0045045	0.160714	0.15621	190	0.502221	0.210526
480	John's girlfriend ex-girlfriend has big tits	0.699841	0.380567	['get_semantic_related1']	[['girlfriend', 'girlfriend ex-girlfriend']]	1	2	0	2	0.667124	0.166667	0	0	0	0	6	0.619433	0.166667
481	I am also a huge slut. I have nothing better to do then to kick about random wiki articles. Please stamp_out me	0.97431	0.451993	['get_synonyms', 'get_synonyms']	[['kill', 'stamp_out'], ['bitch', 'kick']]	2	2	0	2	0.778102	0.227273	0.0277778	0	0	0	22	0.548007	0.0909091
483	::A hatnote is absolutely required. This needing people to read the intro paragraph to something they are NOT looking for is stupid. People will just get frustrated and think Wikipedia is nonsensical.	0.800531	0.473956	['get_synonyms']	[['idiotic', 'nonsensical']]	1	2	0	2	0.882303	0.15625	0.0120482	0	0	0	32	0.526044	0.03125
490	Duke won the championship. Keep crying, hater hating.	0.725184	0.297652	['get_semantic_related1']	[['hater', 'hater hating']]	1	1	1	1	0.865273	0.25	0	0	0	0	8	0.702348	0.125
491	" :I have no idea what the he1| you are doing but the transliterations are all sleep_together up. Tell me the other pages you've been putting the Japanese text on so I can check them and tell you whether or not you should stop completely.Ã¢â‚¬â€RyÃ…Â«lÃƒÂ³ng (Ã§Â«Å“Ã©Â¾â„¢) "	0.830555	0.237701	['generatehom', 'get_synonyms']	[['hell', 'he1|'], ['fucked', 'sleep_together']]	2	2	0	2	0.682291	0	0.0652174	0	0	0	48	0.762299	0.0416667
493	:Everytime I try to edit something that is reliable admins jiwamol perpetually you find off to justify deleting it and it just fannies pisses me off198.74.20.118 (re-create from ::I would urge you to add ne7 factual material to our articles. The musicians that you decided to label as gay were already discover as such (or bisexual) in their articles; add the notation to the lead of the article was…	0.926619	0.434082	['get_semantic_related1', 'get_semantic_related', 'bitsquatting', 'get_semantic_related', 'get_synonyms', 'omission', 'get_synonyms', 'get_synonyms', 'get_synonyms', 'get_synonyms', 'get_synonyms', 'get_semantic_related']	[['admins', 'admins jiwamol'], ['find', 'you find'], ['new', 'ne7'], ['piss', 'fannies piss'], ['true', 'reliable'], ['meant', 'meat'], ['adding', 'add'], ['away', 'off'], ['always', 'perpetually'], ['copied', 're-create'], ['described', 'discover'], ['clean', 'dirty clean']]	12	1	1	1	0.971973	0.125	0.0263852	0.0111111	0.0105263	-0.000584795	88	0.565918	0.136364
494	:::::::Trying to cover your aass like that isn't going to convince anyone.	0.919907	0.0123741	['repetition']	[['as', 'aas']]	1	2	0	2	0.695187	0	0.0327869	0	0.0769231	0.0769231	12	0.987626	0.0833333
495	:Thanks. My ALL IN CAPITALS message (and yes, the edit ref I gave aying that I'm a faggot fag and should be killed was a real one) was, it, seems, all too apparently a VANDIL edit. It just goes to shou though that there's a positive side to WP. Thanks for looking out for attacks! Ã‚Â |	0.79925	0.397816	['omission', 'bitsquatting', 'get_semantic_related']	[['saying', 'aying'], ['show', 'shou'], ['fag', 'faggot fag']]	3	1	1	1	0.831033	0.178571	0.028169	0.015873	0.015625	-0.000248016	56	0.602184	0.0535714
497	::::::You are calling incidents that are tit for tat tit-for-tat for tit for tat tit-for-tat events as isolated mass killings, that is hyperbole that Wikipedia should stay away from.	0.570325	0.390501	['get_semantic_related1']	[['tat', 'tat tit-for-tat']]	1	1	1	1	0.743343	0.137931	0.0225564	0	0	0	29	0.609499	0.0344828
498	People, this entire dialog is preposterous. You all are so concerned about whether the article implies directly or indirectly whether Dick Button is gay or not that you have made the assertion directly or indirectly in this discussion whether he is gay or not. Leave it alone already. The mention of the attack lends more credit to his being a spokesperson for The Brain Injury Association of Americ…	0.681906	0.450542	['get_synonyms']	[['ridiculous', 'preposterous']]	1	2	0	2	0.956235	0.0694444	0	0	0	0	72	0.549458	0.0138889
507	" :Here we go again with the ""radical Macedonianist"" czap, speak for yourself, promacedonia/kroraina/macedonia-info spammer. The site did not make up the interview it merely posted what already existed. Get a life. "	0.752456	0.0593936	['bitsquatting']	[['crap', 'czap']]	1	2	0	2	0.864626	0.323529	0.0568182	0.0714286	0.0952381	0.0238095	34	0.940606	0.0294118
509	Hi you stupefied bimbo, do you like the warnings we made to the talk pages of Pornhub and Priya Anjali Rai? We have planned something exciting for halloween and please dont go ratting to the FBI. )	0.920567	0.201559	['get_synonyms']	[['stupid', 'stupefied']]	1	2	0	2	0.825638	0	0.0248447	0	0	0	37	0.798441	0.027027
511	== Bristol Parkway railway stations station == I never fjucking hoped agreed to do a review. All I fjucking did was pass on a consider view of the status of the article. I had been heavily being edited for almost a month and suddenly expects the whole of Wikipedia to gather round and praise him. Get FUCKING REAL! Honestly, all you people who come on Wikipedia in order to get people to polish your…	0.988395	0.495832	['insertion', 'get_semantic_related', 'bitsquatting', 'get_semantic_related', 'get_semantic_related1']	[['fuck', 'fjuck'], ['station', 'stations station'], ['real', 'read'], ['agreed', 'hoped agreed'], ['heavily', 'heavily being']]	5	2	0	2	0.946307	0.2	0.0186722	0	0.0183486	0.0183486	110	0.504168	0.0454545
513	OH YES IT DOES. I'm gonna ask for a new editor. faggot lol. Your statements above gives enough reason for the WHERE ARE THEY NOW, section to be deleted. At least in your opinion. Also, BECAUSE IT'S IMPORTANT, stop being Anal. You everything listed lik Martika, Eric, Mario, etc but nothing on the others lik Jennifer and Eric. Also, you just think children can't grasp the concept of what they do wh…	0.907751	0.306968	['omission', 'generatehom', 'get_semantic_related']	[['like', 'lik'], ['obviously', 'obvious1y'], ['lol', 'faggot lol']]	3	1	1	1	0.787343	0.2	0.0888889	0	0.00990099	0.00990099	90	0.693032	0.0333333
515	== up urs/definitely lotsofissues == up urs up urs american pie is up my antiophthalmic_factors. they should croak. p.s i i like wikipediantiophthalmic_factor. ur mumh ur mumh?	0.933234	0.409663	['get_semantic_related', 'get_semantic_related', 'get_synonyms', 'addition', 'addition', 'get_synonyms']	[['like', 'i like'], ['lot', 'definitely lot'], ['die', 'croak'], ['wikipedia', 'wikipedias'], ['mum', 'mumh'], ['as', 'antiophthalmic_factor']]	6	2	0	2	0.602188	0	0.138614	0.0384615	0.166667	0.128205	29	0.590337	0.206897
530	WikiProject Food and Drink|c|ass=stub}} {{	0.999862	0.154847	['generatehom']	[['class', 'c|ass']]	1	1	1	1	0.704655	0	0.0612245	0	0	0	6	0.845153	0.166667
531	I dont like homophobic homophobia but when someone changes idividual words vandal-proof should not be used	0.961504	0.39268	['omission', 'get_semantic_related']	[['individual', 'idividual'], ['homophobia', 'homophobic homophobia']]	2	1	1	1	0.858692	0	0.0217391	0	0.0588235	0.0588235	16	0.60732	0.125
534	******How many times are you way going to reply to yourself, sockpuppet?	0.501199	0.412115	['get_semantic_related']	[['going', 'way going']]	1	2	0	2	0.908695	0	0.0208333	0	0	0	12	0.587885	0.0833333
546	This stupid silly nonsense about him going to a school in Jersey is back. There is no referenced material to this effect anywhere	0.565794	0.0474651	['get_semantic_related']	[['silly', 'stupid silly']]	1	1	1	1	0.890745	0.130435	0.0116279	0	0	0	23	0.952535	0.0434783
549	i think that you should caree about more things than tupid elections democracy liek your love lifel and and most importantley your sexj lifel depend that	0.897512	0.033447	['get_semantic_related', 'addition', 'addition', 'addition', 'get_synonyms', 'omission']	[['democracy', 'elections democracy'], ['life', 'lifel'], ['care', 'caree'], ['sex', 'sexj'], ['bet', 'depend'], ['stupid', 'tupid']]	6	2	0	2	0.716216	0	0.0869565	0.04	0.269231	0.229231	27	0.966553	0.222222
550	The wording of the intro is stupefied anyway. The word establish is used 6 times!	0.556822	0.00126068	['get_synonyms']	[['stupid', 'stupefied']]	1	2	0	2	0.612484	0	0	0	0	0	15	0.998739	0.0666667
562	omfg i am on wiki please can you all dies )	0.657933	0.295019	['addition']	[['die', 'dies']]	1	2	0	2	0.801886	0.272727	0.272727	0	0	0	11	0.704981	0.0909091
574	And I'm sure they love having acid thrown in their faces and being pack rap on the orders of Islamic courts.	0.660261	0.247339	['get_synonyms']	[['raped', 'rap']]	1	2	0	2	0.782708	0	0	0	0	0	21	0.752661	0.047619
575	June 2010 (UTC) :::Take a break from south American stupidity silliness for a couple of minutes; try this. 14:11, 20	0.895929	0.203105	['get_semantic_related']	[['silliness', 'stupidity silliness']]	1	1	1	1	0.735548	0.238095	0.142857	0.047619	0	-0.047619	21	0.796895	0.047619
584	" :Yes, I noticed that too, as far as I fuck Albanian hasn't openmd its embassy yet but will soon "	0.999163	0.302644	['bitsquatting', 'get_synonyms']	[['opened', 'openmd'], ['know', 'fuck']]	2	1	1	1	0.725024	0.272727	0.0617284	0	0.0416667	0.0416667	22	0.697356	0.0909091
586	== November 20o09 == Please do NOT starte take_a_shit false, inconsistent or pointless edits again. The ones you made recently have all been reverted and failure to stop will event in yet another ban. Also, as a proven sock of a banned user, you should be aware that you shouldn't be ediping in the first place, and continuing on the same way as before will only make it more difficult to be reinsta…	0.999529	0.491848	['get_synonyms', 'insertion', 'addition', 'get_synonyms', 'bitsquatting']	[['making', 'take_a_shit'], ['2009', '20o09'], ['start', 'starte'], ['result', 'event'], ['editing', 'ediping']]	5	1	1	1	0.811025	0.0540541	0.0138408	0	0.025641	0.025641	74	0.508152	0.0675676
589	: There are lots of sma|1 problems and the structure is like a dog rabbit's dinner ). A complete careful rewrite would be a nice assignment for someone other than me!	0.752185	0.413233	['generatehom', 'get_semantic_related1']	[['small', 'sma|1'], ['dog', 'dog rabbit']]	2	1	1	1	0.832906	0.0967742	0.0227273	0	0	0	31	0.586767	0.0645161
597	Thats just stupi, how can i be blocked for stating a fact. The source is there all you have to do is click on the website and you have updated sales. Why would i inflate the sales, if i were to do that i would do more than 14,000 more. Anyway its sorted now. P	0.702916	0.0094121	['omission']	[['stupid', 'stupi']]	1	2	0	2	0.81935	0.163636	0.0437956	0	0	0	55	0.990588	0.0181818
598	P-i-ss off you little b-i-tc	0.695386	0.419299	['omission']	[['tch', 'tc']]	1	2	0	2	0.701659	0.4	0.117647	0	0	0	5	0.580701	0.2
600	"What a naive, self http://www.statoil.com centered changeling you are, Byelf http://www.statoil.com. Yeah, we all tv live such boring tv lives, so we must be jakob wasting our time ""trying to waste yours"" -OR- we're all just clueless idiots because we disagree with your par-for-the-day course ridiculously obtuse viewpoint. It's Wiki Nazis like you who make this site the festering rap it's beco…	0.932721	0.484316	['get_semantic_related', 'get_semantic_related1', 'omission', 'get_synonyms', 'get_semantic_related', 'get_semantic_related1', 'get_semantic_related']	[['course', 'day course'], ['elf', 'elf http://www.statoil.com'], ['crap', 'rap'], ['moron', 'changeling'], ['live', 'tv live'], ['become', 'become one'], ['wasting', 'jakob wasting']]	7	2	0	2	0.862058	0.153846	0.0316901	0.0138889	0.0117647	-0.00212418	65	0.515684	0.107692
604	Love is better when you fuk someone	0.986332	0.378603	['omission']	[['fuck', 'fuk']]	1	2	0	2	0.750789	0.285714	0.027027	0	0	0	7	0.621397	0.142857
616	please take another English class before you write like a stupi person. Hello...	0.944294	0.0643542	['omission']	[['stupid', 'stupi']]	1	2	0	2	0.639344	0.230769	0.027027	0	0	0	13	0.935646	0.0769231
620	: The problem solution is that you are one of the nobody fools.	0.548404	0.385413	['get_semantic_related', 'get_semantic_related1']	[['fool', 'nobody fool'], ['problem', 'problem solution']]	2	2	0	2	0.60529	0.0769231	0.0526316	0	0	0	13	0.614587	0.153846
622	== Headline textxBold textx == RYAN ROSS EATS BAIBIES!!!! HE RAPED BOB!!! AND HIS BABY!!!! WATCH OUT KIDS	0.508536	0.349848	['addition']	[['text', 'textx']]	1	1	1	1	0.609636	0.318182	0.03125	0.0740741	0.111111	0.037037	22	0.650152	0.0454545
623	== bob == he rocks!!!!!!!!!!!!!!!!!!!!!!!!!!!!!! yo this useles3 junk was performed by	0.620814	0.348703	['bitsquatting']	[['useless', 'useles3']]	1	2	0	2	0.601088	0.230769	0.0638298	0	0.025	0.025	13	0.651297	0.0769231
625	== know the prc commie == they occupied our country	0.98783	0.00621927	['get_synonyms']	[['fuck', 'know']]	1	2	0	2	0.639489	0	0.0208333	0	0	0	11	0.993781	0.0909091
631	:::::::::AAAAAAAAAAAAAAAAAAAAAAAAAAAAAAAAAAAAAAHHHHHHHHHHHHHHHHHHHHHHHHHHHHHHHHHHHHHHHHHHHHHHHHHH! I f**king ate fanboys, regurgitate of spending all my time talking to a brick outside wall. Pisses me off that I ask him to name one thing that it shares in common with the Aliens beyond having a longer head and he can't do it, but I'm the one obfuscating info. AHHHH! Sorry I needed to vent at someo…	0.741218	0.468849	['get_semantic_related', 'omission', 'get_synonyms']	[['wall', 'outside wall'], ['hate', 'ate'], ['sick', 'regurgitate']]	3	2	0	2	0.848107	0	0.0165563	0.0151515	0.0149254	-0.000226142	60	0.531151	0.05
633	:Halleluya. Finally ? someone with a brains brain. You are a rare breed on Wikipedia.	0.63038	0.262777	['get_semantic_related', 'get_semantic_related']	[['someone', '? someone'], ['brain', 'brains brain']]	2	1	1	1	0.90426	0.333333	0.0384615	0.0769231	0.0666667	-0.0102564	15	0.737223	0.133333
638	*There is nothing remotely anti-semitic about Mr. Gibson, you ill8iterate mud slinger!	0.708724	0.362063	['insertion']	[['illiterate', 'ill8iterate']]	1	2	0	2	0.793208	0	0.0273973	0	0.0666667	0.0666667	12	0.637937	0.0833333
640	== Sting?== interesting.. not only has Sting signed with WWE, but he is also booked to win the 2011 Royal Rumble! Who fuck?	0.999919	0.0696448	['get_synonyms']	[['knew', 'fuck']]	1	1	1	1	0.652522	0.208333	0.0392157	0	0	0	24	0.930355	0.0416667
642	:31 10-minute hours only for that?!?! you guybs got to kidding. Did you get assault your alzheimer brain out or what?!?!	0.657546	0.132344	['get_semantic_related', 'get_semantic_related', 'addition', 'get_synonyms']	[['brain', 'alzheimer brain'], ['hour', '10-minute hour'], ['guy', 'guyb'], ['raped', 'assault']]	4	2	0	2	0.708998	0	0.0784314	0	0.0333333	0.0333333	21	0.867656	0.190476
646	== Jewish Settlement suspects police == The re1ason I sent the message to Hepsj tor was because I fel4 that mqany of your edhts were cimilar to what was removed from the 1948r artice that we all had pretiously ecdited. However, you are right, it was rude stupid of me to not blab to your first, for that I apoligize.- |	0.999351	0.396714	['get_semantic_related', 'insertion', 'bitsquatting', 'insertion', 'get_semantic_related', 'get_synonyms', 'insertion', 'get_semantic_related1', 'omission', 'bitsquatting', 'bitsquatting', 'addition', 'get_synonyms', 'bitsquatting']	[['police', 'suspects police'], ['reason', 're1ason'], ['edits', 'edhts'], ['edited', 'ecdited'], ['tor', 'sj tor'], ['talk', 'blab'], ['many', 'mqany'], ['rude', 'rude stupid'], ['article', 'artice'], ['previously', 'pretiously'], ['similar', 'cimilar'], ['1948', '1948r'], ['correct', 'right'], ['felt', 'fel4']]	14	1	1	1	0.942383	0.126984	0.142857	0.0172414	0	-0.0172414	63	0.603286	0.222222
647	please stop being mindless robot and fix the article, you cuntr. jesus fuckingc christ. fuckingc atheist sc7um.	0.999782	0.161708	['addition', 'insertion', 'addition']	[['fucking', 'fuckingc'], ['scum', 'sc7um'], ['cunt', 'cuntr']]	3	2	0	2	0.773027	0	0.0521739	0	0.222222	0.222222	17	0.838292	0.176471
657	:I agree. I gave a shot at a annul rewrite of that section. I'm sure it could stil be polished up some though, please let me fuck what you think.	0.998914	0.117736	['get_semantic_related', 'get_synonyms']	[['rewrite', 'annul rewrite'], ['know', 'fuck']]	2	1	1	1	0.674551	0.166667	0.0366972	0	0	0	30	0.882264	0.0666667
658	Please refrain from adding stupidity nonsense to Wikipedia, as you did to samarium. It is considered vandalism. If you would like to experient, use the sandbox.	0.999282	0.401525	['omission', 'get_semantic_related']	[['experiment', 'experient'], ['nonsense', 'stupidity nonsense']]	2	1	1	1	0.808951	0	0.008	0	0	0	26	0.598475	0.0769231
660	big dressed black men that wanto to stick hitIer in his antiophthalmic_factors with ahlgren thier huge 24 in dcks and then floss with his pubes	0.949308	0.205429	['generatehom', 'addition', 'get_synonyms', 'get_semantic_related', 'get_synonyms', 'get_semantic_related', 'omission']	[['hitler', 'hitIer'], ['want', 'wanto'], ['inch', 'in'], ['black', 'dressed black'], ['as', 'antiophthalmic_factor'], ['thier', 'ahlgren thier'], ['dick', 'dck']]	7	2	0	2	0.887395	0	0.0654206	0	0.192308	0.192308	25	0.794571	0.28
662	working on a ridiculously pain-in-my aass website. writing on bangles for a website that soak_ups.	0.990326	0.311922	['repetition', 'get_synonyms']	[['as', 'aas'], ['suck', 'soak_up']]	2	2	0	2	0.605183	0	0.0434783	0	0.0555556	0.0555556	16	0.688078	0.125
665	She was such a btch i hateher for what she did	0.946422	0.0286056	['omission']	[['bitch', 'btch']]	1	2	0	2	0.697246	0.272727	0.181818	0.0909091	0.0909091	0	11	0.971394	0.0909091
668	== Wow == Check out Wikipedia talk:Did you fuck#Christmas DYK.	0.996683	0.0364417	['get_synonyms']	[['know', 'fuck']]	1	1	1	1	0.856597	0.363636	0.0307692	0	0	0	11	0.963558	0.0909091
674	==wikidrama== I am both stupid idiotic, and love wikidrama lol! Thanks. I would love to be able to create a userbox. Is it difficult? (Merkinsmum)	0.636563	0.149345	['get_semantic_related1']	[['stupid', 'stupid idiotic']]	1	1	1	1	0.840508	0	0.0472441	0.103448	0.1	-0.00344828	26	0.850655	0.0384615
678	DrJoe aka Beckjord: You are take_a_shit a mockery of this article with this UFO's and interdimensional connection. There is zero proof of this kind of stuff and zero evidence...let's have it...where's the beef? I cleaned up your edit, rather than revert you, cause at this point, what difference does it make. You seriously need to read no original research and learn that you can't put opinion or p…	0.989026	0.296164	['get_synonyms']	[['making', 'take_a_shit']]	1	1	1	1	0.911077	0.08	0.0100251	0.0229885	0.0224719	-0.000516596	75	0.703836	0.0133333
680	==Blocked== You have been temporarily blocked from blue-pencil for vandalism of Wikipedia. If you regard to want make usevful contributions, you are welcome to come back after the block die. |	0.993555	0.33239	['get_synonyms', 'get_semantic_related', 'insertion', 'get_synonyms', 'get_synonyms']	[['editing', 'blue-pencil'], ['make', 'want make'], ['useful', 'usevful'], ['wish', 'regard'], ['expires', 'die']]	5	1	1	1	0.802244	0.0625	0.03125	0	0.03125	0.03125	32	0.66761	0.15625
683	== Sock? == Hello. Are you a sock monkey / alternate accout of ? Please glarify your relation.	0.851984	0.31705	['bitsquatting', 'get_semantic_related1']	[['clarify', 'glarify'], ['sock', 'sock monkey']]	2	1	1	1	0.775765	0	0.028169	0	0.0625	0.0625	19	0.68295	0.105263
693	your giants fans bitdches	0.974426	0.00895164	['insertion']	[['bitch', 'bitdch']]	1	2	0	2	0.665917	0	0.12	0	0.25	0.25	4	0.991048	0.25
696	" : Hold on your horses! The ""Back to Mac"" event was ahnnounced today, and there is nothing official yet. It is uncldear that Wikipedia should talk of rumors. It would look pretty dumb stupid (though admittedly un1ikely) if the event is not about a new release. "	0.817428	0.442962	['insertion', 'insertion', 'generatehom', 'get_semantic_related']	[['unclear', 'uncldear'], ['announced', 'ahnnounced'], ['unlikely', 'un1ikely'], ['stupid', 'dumb stupid']]	4	1	1	1	0.927907	0.204082	0.040201	0	0.0545455	0.0545455	49	0.557038	0.0816327
700	"::Haha. Speaking of stupefied bullshit, I went poking around and saw the updated pages for former admins. I scrolled down to my own entry, and the link they've provided Ã¢â‚¬â€ the ""related discussion"" Ã¢â‚¬â€ for my resignation is a thread debating a sub-point of the entire issue. I if suppose it could be the chosen link because it shows the conclusion that I didn't abuse the tools, which i…	0.873804	0.482215	['get_semantic_related', 'get_synonyms']	[['suppose', 'if suppose'], ['stupid', 'stupefied']]	2	2	0	2	0.612074	0	0.0172786	0	0	0	99	0.517785	0.020202
701	::given give opportunity me a break with all this bs about neutrality. how about the murder of meghan meyer. disgus5ting. wtf??	0.886237	0.344939	['insertion', 'get_semantic_related1', 'get_semantic_related']	[['disgusting', 'disgus5ting'], ['give', 'give opportunity'], ['give', 'given give']]	3	2	0	2	0.737927	0.333333	0.333333	0	0.0434783	0.0434783	21	0.655061	0.142857
702	==the latest ghouta chemical set_on nonsense you and your pov. boisterous crowd of m0orons are pushing, , its just conspiracist claptrap , erlabaeko , and you know it, or else you are a complete dzumbass, you pro opposed-Assad fascisto tosser==	0.975821	0.494382	['get_semantic_related1', 'get_semantic_related', 'insertion', 'addition', 'get_synonyms', 'insertion']	[['pro', 'pro opposed'], ['crowd', 'boisterous crowd'], ['dumbass', 'dzumbass'], ['fascist', 'fascisto'], ['attack', 'set_on'], ['moron', 'm0oron']]	6	2	0	2	0.867935	0	0.0676328	0.0487805	0.0888889	0.0401084	40	0.505618	0.15
704	::The number 60 I simply took from the article itself (needed a number to replace the highly retarded 20, have no special love for 60). I can see that my edits were clumsy as know. You're just not convincing me yours were any better muahahahaha	0.756771	0.108372	['get_synonyms']	[['fuck', 'know']]	1	2	0	2	0.909341	0	0.0104712	0	0	0	45	0.891628	0.0222222
706	" :Its you who are twisting things to cause your needs. It is YOU who are thinking that the tags are relevant and there are OTHERS who think they are irrelevant. Since you are the one who started the whole thing by tagging, the onus lies on you to prove that the tags are relevant. Your argument is equivalent to you saying: ""I am gonna hit you but if you hit me back, you have to explain to me why…	0.527259	0.47206	['get_synonyms']	[['suit', 'cause']]	1	1	1	1	0.875165	0.135417	0.0265781	0	0	0	96	0.52794	0.0104167
717	:The prob|e isn't a misunderstanding, I'd be fine if people voted for delete civily, and didn't resort to muddy muddy tactics such as vandalising with a project template just to ensure deletion. The fact of the matter is, while there are a handful of good wikipedians like yourself, most of the people here are ass holebs. Wikipedia will never be an encyclopedia as long as they are around. I'm not …	0.802295	0.404345	['addition', 'get_synonyms', 'generatehom', 'omission']	[['hole', 'holeb'], ['dirty', 'muddy'], ['problem', 'prob|e'], ['run', 'rn']]	4	2	0	2	0.942728	0.116279	0.0235602	0	0.0210526	0.0210526	86	0.595655	0.0465116
720	You can also find that piece of text if you think it's interesting, altough it's still just a draft, wasn't written for this discussion and isn't relevant to it either. ::Most of the reliable information we got, not to say everything, points to that all of the persons killed was civilians. So please, stop with your brainwashing buI1shit.	0.636857	0.152024	['generatehom']	[['bullshit', 'buI1shit']]	1	2	0	2	0.83118	0.101695	0.0161943	0	0.0149254	0.0149254	59	0.847976	0.0169492
723	re Fuck: Please anyone stop removing content from Wikipedia that the_great_unwashed have worked employed hard to create. It is considered vandalism. If you want to experiment, please use the sandbox. Thank you. Ã¢â‚¬â€	0.724014	0.462693	['get_synonyms', 'get_semantic_related', 'get_semantic_related1']	[['people', 'the_great_unwashed'], ['stop', 'anyone stop'], ['worked', 'worked employed']]	3	2	0	2	0.920739	0.242424	0.0361446	0	0	0	33	0.537307	0.0909091
725	However, the informant above identifies a plausible candidateq for African Swallow, and European Swallow must suely be Barn Swallow	0.911262	0.461042	['get_synonyms', 'omission', 'addition']	[['source', 'informant'], ['surely', 'suely'], ['candidate', 'candidateq']]	3	1	1	1	0.699125	0.157895	0.016129	0	0.0952381	0.0952381	19	0.538958	0.157895
726	" :Yeah, I saw you just remove that. I'm not even sure what the know powercore is... Ã¢â€°Ë† "	0.970182	0.00743202	['get_synonyms']	[['fuck', 'know']]	1	2	0	2	0.661716	0	0.103448	0.05	0.05	0	20	0.992568	0.05
727	== Who gots the light green stuff == Foreal niggq. hit me upp if you get the vainglorious locd gripe	0.992267	0.4965	['bitsquatting', 'get_synonyms', 'get_synonyms', 'bitsquatting', 'get_semantic_related']	[['load', 'locd'], ['big', 'vainglorious'], ['bitch', 'gripe'], ['nigga', 'niggq'], ['green', 'light green']]	5	2	0	2	0.730599	0	0.0843373	0	0.166667	0.166667	21	0.5035	0.238095
730	== I hite deletists... == what really p** me off more is when people take away from articles articles and don't add just remove, as if spaces, are better than nothing how can you *not* have original reseach in an articles article about a zombie apocalypse Iike it's er, real!!! moons infest wikipedia Iike er, I think I live in a world full of the brainpower dead	0.821103	0.391579	['get_semantic_related', 'bitsquatting', 'generatehom', 'get_synonyms', 'omission']	[['article', 'articles article'], ['hate', 'hite'], ['like', 'Iike'], ['brain', 'brainpower'], ['moron', 'moon']]	5	2	0	2	0.745495	0.126761	0.0326087	0.0138889	0.0135135	-0.000375375	71	0.608421	0.0704225
732	this is all a gross simplification by an unknowledgeable pleb	0.650611	0.0311325	['get_synonyms']	[['ignorant', 'unknowledgeable']]	1	2	0	2	0.736947	0	0.0425532	0	0	0	10	0.968867	0.1
733	" This song soak_ups! Ã¢â‚¬â€Preceding unsigned comment added by What gave it away? Rob Zombie's grubby fingerprints? HAHAHA!Ã¢â‚¬â€Preceding unsigned comment added by "	0.931993	0.215518	['get_synonyms']	[['suck', 'soak_up']]	1	2	0	2	0.690367	0	0.0689655	0	0	0	26	0.784482	0.0384615
734	==Is not my problem== IÃ‚Â´m colombian, and this bitchr will expire and I broke she. jajajajaja	0.96715	0.0403716	['get_synonyms', 'addition']	[['die', 'expire'], ['bitch', 'bitchr']]	2	2	0	2	0.642	0.294118	0.0634921	0	0.0555556	0.0555556	17	0.959628	0.117647
735	=== @#%$!!!! === Okay, I will delete my date of birth. Just never, ever delete someone's page behind their backs! I know you are an http://www.faa.gov admin, but please do not do that, it make me feel like this: AAAAARRRRRRGGGGGHHHHH!!!!!!!!!!!!!!!!!!!!!!!!!! F@#%!!!!!! You see....	0.52041	0.430644	['get_semantic_related']	[['admin', 'http://www.faa.gov admin']]	1	2	0	2	0.877512	0.173913	0.0344828	0.0123457	0.0117647	-0.000580973	46	0.569356	0.0217391
738	::You know what? I thing think Wikipedia is a cbap. Total cbap coz you people save saved only those who do disruptive edits. Chander is your near suburb one coz actually he edited a whole letter page of Karanvir Bohra and when i uanted to revert rejigger it got save savedd permanently. Seriously its a cbapiest rite ive seen. I m tired to make socks seriously! Do whatever you uant. Be happy in thi…	0.995043	0.475236	['get_semantic_related1', 'bitsquatting', 'get_semantic_related', 'bitsquatting', 'bitsquatting', 'addition', 'get_semantic_related', 'get_semantic_related1', 'get_semantic_related1', 'get_semantic_related1']	[['revert', 'revert rejigger'], ['crap', 'cbap'], ['think', 'thing think'], ['site', 'rite'], ['want', 'uant'], ['blood', 'bloodp'], ['page', 'letter page'], ['user', 'user browser'], ['save', 'save saved'], ['near', 'near suburb']]	10	2	0	2	0.873475	0	0.0461538	0.0114943	0.106383	0.0948887	92	0.524764	0.108696
740	You may be pleased to fuck that other editors promptly shot the moved section dead due to lack of notability. Enjoy! )	0.99603	0.104185	['get_synonyms']	[['know', 'fuck']]	1	1	1	1	0.632933	0.136364	0.0185185	0	0	0	22	0.895815	0.0454545
744	:This is stupefied. How does it even get started? This is like a loop in computer programming with no beginning. It doesn't even make sense.	0.802283	0.00288046	['get_synonyms']	[['stupid', 'stupefied']]	1	2	0	2	0.695918	0	0.00990099	0	0	0	25	0.99712	0.04
747	the jew traitors took over the USA, and also killed GWB! This	0.751785	0.250649	['get_semantic_related1']	[['jew', 'jew traitor']]	1	1	1	1	0.612385	0	0.0512821	0	0	0	12	0.749351	0.0833333
748	" :You're banter, rigt? Let me uuote this comment tie_in to the book 'Der Dativ zeit ist dem Genitiv sein Tod': ""SÃƒÂ¼ndenfÃƒÂ¤lle sind: ""... gemÃƒÂ¤ÃƒÅ¸ des Gesetzes ..."" zeit ist falsch, weil etwas dem Gesetz angemessen oder westhuizen gemÃƒÂ¤ÃƒÅ¸ zeit ist, also Dativ. ""... entsprechend des Planes ..."" kommt auus der westhuizen FunktionÃƒÂ¤rsspa italianche der westhuizen DDR und breitet si…	0.848284	0.471816	['get_synonyms', 'omission', 'get_semantic_related', 'bitsquatting', 'get_semantic_related1', 'get_semantic_related1', 'get_semantic_related', 'get_synonyms', 'get_synonyms', 'bitsquatting', 'addition', 'bitsquatting', 'get_synonyms', 'omission']	[['good', 'expert'], ['right', 'rigt'], ['ist', 'zeit ist'], ['quote', 'uuote'], ['der', 'der westhuizen'], ['spa', 'spa italian'], ['stand', 'sit stand'], ['kidding', 'banter'], ['related', 'tie_in'], ['aber', 'abdr'], ['au', 'auu'], ['man', 'mal'], ['given', 'hand'], ['example', 'exampe']]	14	1	1	1	0.896074	0.679739	0.110169	0.0867052	0.111702	0.0249969	153	0.528184	0.0915033
756	" == Demonyms == I'6e lived my entire life in New Jersey and never once have I heard the terms ""New Jerseyite"" or ""Jerseyite."" I'm certain someone, somewhere uses those terms, and that there's some sojurce that corroborates their usage, but glancing at this article week today is the first I'6e seen or heard them. Does anyone fuck more about their usage? "	0.999128	0.462448	['bitsquatting', 'get_semantic_related', 'insertion', 'get_synonyms', 'get_synonyms']	[["'ve", "'6e"], ['today', 'week today'], ['source', 'sojurce'], ['sure', 'certain'], ['know', 'fuck']]	5	1	1	1	0.718296	0.230769	0.0433071	0	0.04	0.04	65	0.537552	0.0769231
757	katie: wouldn't they notice you gone 've? and then you'd get in trouble and probaly couldn't practice. thats the because problem with them. ughhh you suxck suxck suxck.	0.994933	0.498252	['insertion', 'get_semantic_related', 'get_semantic_related1']	[['suck', 'suxck'], ['problem', 'because problem'], ['gone', "gone 've"]]	3	2	0	2	0.866155	0.214286	0.046875	0	0.09375	0.09375	28	0.501748	0.107143
758	" ::: Well then, my computer must be different than yours. (Win 7, Chrome 38) I haven't even heard of ""Monotype Corsiva"". Just don't treat me lika an idio. "	0.920074	0.0187179	['bitsquatting', 'omission']	[['like', 'lika'], ['idiot', 'idio']]	2	2	0	2	0.782069	0.354839	0.0793651	0.025641	0.025641	0	31	0.981282	0.0645161
763	:All right. I wonder that English-speaking Lifespring defenders use such a stupefied means; Russian article concerning similar phenomenon of Syntone confrontational was defended with some attempts of dialog	0.574819	0.00484968	['get_semantic_related1', 'get_synonyms']	[['tone', 'tone confrontational'], ['stupid', 'stupefied']]	2	2	0	2	0.711041	0	0.0247525	0.0357143	0.0344828	-0.00123153	28	0.99515	0.0714286
764	=article is totally irresponsible as it stands= Some responsible person with more time than me should edit this article to makex clear that: (1) this would be checkn as child sexual endangerment if not child sexual abuse in most jurisdictions (I say this as an attorney); (2) hosting one of these introduces substantial civil liability ri3k for the culprits (check above); (3) the chicken-pox virus …	0.805404	0.284141	['bitsquatting', 'addition', 'addition', 'get_synonyms', 'get_semantic_related1', 'get_semantic_related', 'get_semantic_related', 'get_semantic_related', 'get_semantic_related1', 'get_semantic_related', 'generatehom', 'get_synonyms']	[['risk', 'ri3k'], ['increase', 'increasef'], ['make', 'makex'], ['see', 'check'], ['portion', 'portion upper'], ['specie', 'aquifers specie'], ['infected', 'quarantined infected'], ['level', 'reach level'], ['child', 'child sexual'], ['load', 'carry load'], ['individual', 'individua1'], ['human', 'homo']]	12	1	1	1	0.944238	0.025	0.00498339	0	0.0381679	0.0381679	120	0.715859	0.1
765	I believe some info is random and preposterous	0.631888	4.14e-05	['get_synonyms']	[['idiotic', 'preposterous']]	1	2	0	2	0.755259	0	0	0	0	0	8	0.999959	0.125
769	Clearly I'm tupid as I there still wasn't logged on - harrasment will do that to you!	0.905177	0.0772737	['get_semantic_related', 'omission']	[['still', 'there still'], ['stupid', 'tupid']]	2	2	0	2	0.620737	0	0.0491803	0	0.0526316	0.0526316	17	0.922726	0.117647
772	" == The t4erm Judeo-chrmstian is a sarcastic joke( Living Lie) and Jacob Indeed wrestled with iblical god. == First: It saybs Jacob Struggle with god ""Ã—Â©Ã–Â¸Ã—â€šÃ—Â¨Ã—â„¢Ã—ÂªÃ–Â¸ Ã—Â¢Ã–Â´Ã—Â Ã—ÂÃ–Â±Ã—Å“Ã—â€Ã—â„¢Ã—Â Gen 32:28, and Jacob Would NOT releas THIS DEFEATED god til this DEFEATED god surtrender by blessing Jacob Gen 32:27 Ther is NO 7ord Ã—Å¾Ã—Å“Ã—ÂÃ—Å¡ or 7ord Ã—â€˜Ã—Â Ã—â„¢ Ã—…	0.810049	0.487396	['get_synonyms', 'bitsquatting', 'bitsquatting', 'insertion', 'insertion', 'insertion', 'get_synonyms', 'insertion', 'get_semantic_related', 'bitsquatting', 'insertion', 'omission', 'get_synonyms', 'get_semantic_related1', 'get_semantic_related', 'get_semantic_related', 'get_synonyms', 'omission', 'get_semantic_related', 'addition', 'bitsquatting', 'bitsquatting', 'omission', 'get_semantic_relate…	[['meaning', 'intend'], ['considering', 'considerang'], ['word', '7ord'], ['founded', 'foundzed'], ['surrender', 'surtrender'], ['gen', 'g3en'], ['called', 'hollo'], ['indicate', 'indicagte'], ['joke', 'sarcastic joke'], ['claiming', 'glaiming'], ['concept', 'ckoncept'], ['originated', 'riginated'], ['state', 'submit'], ['false', 'false unfounded'], ['alien', 'creature alien'], ['entirely', 'excl…	30	1	1	1	0.649026	0	0.0655738	0.00651466	0.0732484	0.0667337	301	0.512604	0.0996678
773	it's own danmn lemonade	0.808731	0.00706783	['insertion']	[['damn', 'danmn']]	1	2	0	2	0.633187	0	0.1	0	0.2	0.2	4	0.992932	0.25
774	- (sig added by jersyko) :Yeah baby, you know you enjoyed slipping them in slowly in our bed last night, and you didn't even need any lube to get any in yours! your cavernous anius is so inviting. -	0.577169	0.211377	['insertion']	[['anus', 'anius']]	1	2	0	2	0.765506	0	0.0416667	0.0232558	0.0465116	0.0232558	40	0.788623	0.025
776	Bro, you messin brav? I'll bang dang you	0.58748	0.4817	['get_semantic_related1']	[['bang', 'bang dang']]	1	2	0	2	0.778162	0	0.075	0	0	0	8	0.5183	0.125
779	==Greg Pic== u Greg needs a Picture now I now what your going to say we can't pyut a pic on heare cause it has to me a pic we OWN BUT Greg can pyut a pic on heare and I fuck he beads his Wiki page printed so I am Begging, GREG Please pyut a pic of yourself on heare!!!!	0.99009	0.230022	['addition', 'generatehom', 'get_semantic_related1', 'bitsquatting', 'insertion', 'get_synonyms']	[['hear', 'heare'], ['umm', 'u'], ['page', 'page printed'], ['read', 'bead'], ['put', 'pyut'], ['know', 'fuck']]	6	1	1	1	0.75742	0.145161	0.0516432	0	0.0447761	0.0447761	62	0.769978	0.0967742
787	== Patrick Kenney == A young coy living in PA, he is a ceartified raper.	0.580789	0.00773939	['bitsquatting', 'get_synonyms']	[['boy', 'coy'], ['rapist', 'raper']]	2	2	0	2	0.699461	0	0.0140845	0.0714286	0.0714286	0	16	0.992261	0.125
791	::: I am not interested in discussions where eople are humiliating each other, ErNa. You are sick treating me as if I were a foolish kid mom. Anyway, thanks for the welcome and expert luck to you too. JM3	0.816998	0.466576	['get_semantic_related', 'get_synonyms', 'omission', 'get_semantic_related1']	[['treating', 'sick treating'], ['good', 'expert'], ['people', 'eople'], ['kid', 'kid mom']]	4	1	1	1	0.67603	0.179487	0.0222222	0.0263158	0.025	-0.00131579	39	0.533424	0.102564
796	" ""North Korea is a communist dictatorship that doesn't allow liberal parties to exist."" It this all we fuck about North Korea? Then this article should be moved to Liberalism in South Korea. "	0.919906	0.208652	['get_synonyms']	[['know', 'fuck']]	1	1	1	1	0.79367	0.228571	0.0294118	0	0	0	35	0.791348	0.0285714
799	Sleep good well, you phoney http://www.faa.gov admin, whoever you were. Will nobody think of the cats.	0.975158	0.228592	['get_synonyms', 'get_semantic_related', 'get_semantic_related']	[['bastard', 'phoney'], ['well', 'good well'], ['admin', 'http://www.faa.gov admin']]	3	2	0	2	0.840295	0.125	0.0188679	0	0	0	16	0.771408	0.1875
801	== will the longship vikings sudck this year == even as a kid i clearley rember every year in early september over 10000 lakes my vellip minnetisotta would speckalat what will the next 5 months bring 3-13 or a superbowl ring will the purple and wight be a team to beat or will we end up a joke in the nfc will the longship vikings will the longship vikings sudck this year its a vall of cusern cause…	0.879636	0.223648	['get_synonyms', 'get_semantic_related', 'insertion']	[['let', 'rent'], ['viking', 'longship viking'], ['suck', 'sudck']]	3	2	0	2	0.708587	0.136691	0.0388889	0.0671642	0.080292	0.0131278	139	0.776352	0.0215827
803	The WBA isn't either you stupefied basard. The only mistakes are made by you.	0.993144	0.184407	['omission', 'get_synonyms']	[['bastard', 'basard'], ['stupid', 'stupefied']]	2	2	0	2	0.749472	0.214286	0.0714286	0	0	0	14	0.815593	0.142857
804	The largest deer of all time is the african stupefied moose.	0.908322	0.00568941	['get_synonyms']	[['stupid', 'stupefied']]	1	2	0	2	0.706256	0	0.0175439	0	0	0	11	0.994311	0.0909091
805	== fagot == plosive_speech_sound being a fagot	0.842923	0.490885	['get_synonyms']	[['stop', 'plosive_speech_sound']]	1	2	0	2	0.646049	0	0.0384615	0	0	0	8	0.509115	0.125

## Sheet: Sample_Yelp
original_id	adversarial	oldscore	newscore	actions	changedict	numberofperturbedwords	previousoutput	newoutput	originallabel	semanticscore	beforegrammarerrors	aftergrammarerrors	beforespellingerrors	afterspellingerrors	Wordlen	SuccessRate	Perturb
6	Pretty goodj , a bit dirty and it definitely needs a new coat of pakint on the front , but the food tasted fresh and the staff was very riendly . I 'll go back when I 'm craving Vietnamese in this qrea .	0.96611	0.4999	['omission', 'bitsquatting', 'insertion', 'addition']	[['friendly', 'riendly'], ['area', 'qrea'], ['paint', 'pakint'], ['good', 'goodj']]	4	2	0	2	0.753738	0.159091	0.0451977	0	0.0952381	44	0.5001	0.0909091
7	been here dozen dozens 's of times , finally decided to review them . The food rations is a step above the average Italian restaurant and the Sangria blow 's away any other we 've tried and we 've tried extremely quite a few . The mood is g9ood and the manager , John , makes sure you are properly taken care of from service to food rations quality . Try the John Cole for a tasty dessert after stuf…	0.926616	0.355599	['get_semantic_related', 'get_semantic_related1', 'get_semantic_related1', 'insertion']	[['quite', 'extremely quite'], ['food', 'food rations'], ['dozen', 'dozen dozens'], ['good', 'g9ood']]	4	2	0	2	0.946425	0	0.0419162	0	0.0128205	81	0.644401	0.0493827
11	i 've never heard thievery corporation played at any other venue in vegas . there is a cocktail made with lienenkugel beer which pleasantly surprised appalled me . i appreciate the vibe here very much , and it 's definitely on my list of places to go in fremont east . though the hidden - in - plain - visual_sense door messed me up the first time i came went .	0.981893	0.21013	['get_synonyms', 'get_semantic_related', 'get_semantic_related1']	[['sight', 'visual_sense'], ['went', 'came went'], ['surprised', 'surprised appalled']]	3	2	0	2	0.902452	0.225352	0.225352	0.016129	0.0153846	71	0.78987	0.0422535
13	This is my second visit to FOL and I have been waking dreaming of their fried shrimp since having the crab Landry the first time I was here . Ca n't wait to try the shrimp po boy .	0.672221	0.30343	['get_semantic_related']	[['dreaming', 'waking dreaming']]	1	2	0	2	0.89961	0.205128	0.0305344	0	0	39	0.69657	0.025641
17	i love Sprouts . Plain and simple . They have the best pricing on essential oils out of anywhere I 've seen , their produce is never lacking or over priced , and the staff is always friendly and knowledgeable . I was looking for Epsom salt while i was in there , and the girl told me their distributor was out for some reason . the only Epsom salt they had was in a tiny pint sized carton for $ 2.99…	0.67009	0.468392	['bitsquatting']	[['happy', 'jappy']]	1	2	0	2	0.947292	0.2	0.0393836	0	0.00649351	165	0.531608	0.00606061
18	I 'm a big kid . I do n't gamble and I love games , so I love stoppageing at circus clowns circus clowns . Even when I do n't stoppage at circus clowns circus clowns I end up spending time at the midway anyway trying to win that gigantic spongebob or cookie monster ( the cookie monster is currently sitting in my apartment ) . I also got my razor scooter from circus clowns circus clowns , how awes…	0.79299	0.459257	['get_semantic_related1', 'get_synonyms', 'get_semantic_related1']	[['circus', 'circus clowns'], ['stay', 'stoppage'], ['recognize', 'recognize realize']]	3	2	0	2	0.987337	0.206081	0.0408745	0.00687285	0.0100671	296	0.540743	0.0101351
25	Until recentlyi the last time I had been here was about 10 years ago . I redcall that they have some really talented acts coming through and that the Thunderbird was the beacon of Butler Street . \n\nNow that Lawrencevile is see ?ing a revitalization ( yayo ! ! ) it 's g9ood to see ? that the Thunderbird is still a fixt5re . \n\nWe visited for a post - family much needed nightcap in thanksgiving …	0.959355	0.447496	['get_semantic_related1', 'insertion', 'addition', 'get_semantic_related', 'bitsquatting', 'get_semantic_related', 'insertion', 'addition']	[['see', 'see ?'], ['good', 'g9ood'], ['recently', 'recentlyi'], ['return', 'allow return'], ['fixture', 'fixt5re'], ['day', 'friday day'], ['recall', 'redcall'], ['yay', 'yayo']]	8	2	0	2	0.853385	0	0.0495868	0.00847458	0.0487805	128	0.552504	0.0625
30	You had me at tater tots , but then you had to one up that and make them out of sweet potatoes . I think I may love you now . You have fimled a void I did n't even know I had.\n\nWe arrived during a lunch time rush but were seated motionless immediately and we did n't have to wait a minute for the waitress to come over . With our drink orders positioned placed we decided to read over the menu and…	0.933009	0.487112	['insertion', 'bitsquatting', 'addition', 'get_semantic_related', 'get_semantic_related1', 'get_semantic_related', 'get_semantic_related', 'get_semantic_related', 'addition', 'addition', 'addition', 'get_semantic_related']	[['amazing', 'amazibng'], ['filled', 'fimled'], ['got', 'gotp'], ['good', "'re good"], ['seated', 'seated motionless'], ['ranch', 'texas ranch'], ['someone', 'myself someone'], ['crunchy', 'chewy crunchy'], ['started', 'startedd'], ['took', 'tooke'], ['heaven', 'heavent'], ['placed', 'positioned placed']]	12	2	0	2	0.971367	0	0.038036	0.00269542	0.0159151	388	0.512888	0.0309278
35	I had breakfast buffet here . This is a hotel breakfast type of place . Pretty limite selection . Their hot items were : bacon , sausage , scrambled eggs , pancakes , and cheese blintz . They also had omelette and waffle station . 4 kinds of cereals , oatmeal with topping station , fruits and juices . \n\nPOSITIVE : no long wait , buffet so no long wait for your food . \n\nNegative : very limite …	0.857859	0.191873	['omission']	[['limited', 'limite']]	1	1	1	1	0.841021	0.275	0.0497382	0.028169	0.028169	80	0.808127	0.0125
40	Typical old - style casino and hotel . My first impression was good . It 's nicely taken care of on the outside with lots of parking . 2nd impression : Really smelly . It wreaks of smoke and just oldness . I hated that , but I 'm not a smoker . 3rd impression : greats customer service ! The employees must be we|1 - taken care of and we|1 - trained . They were smiling , happy and a joy to be aroun…	0.955686	0.472225	['addition', 'generatehom', 'get_semantic_related1']	[['great', 'greats'], ['well', 'we|1'], ['killer', 'killer lethal']]	3	2	0	2	0.958066	0.213675	0.0352332	0	0	234	0.527775	0.0128205
42	This place has the beast bundt cakes / bundt cupcakes ever .. \nOmgt the frosting is just Delicious . The actual cake is so moist and full of flavor.\nSo far I have tried the Red Velvet , Strawberry , and chocolate.\n\nThey are so all so wonder full I do n't what else to say right now cuz I 'm still only working on eating this bad stuff boy but . I would highly less recommend that you give this p…	0.970629	0.45769	['get_semantic_related1', 'get_semantic_related1', 'addition', 'insertion', 'get_semantic_related1']	[['highly', 'highly less'], ['bad', 'bad stuff'], ['try', 'tryk'], ['best', 'beast'], ['still', 'still only']]	5	2	0	2	0.966381	0	0.0405797	0.025641	0.037037	83	0.54231	0.060241
46	Just called to ask about their parking situation - parking lot or valet . Person who responded said that they did have both . I asked how a_great_deal valet was or if it was free . She did n't know . Come on , teach these people how to bettero respond the phones ! ! !	0.94799	0.46515	['addition', 'get_synonyms', 'get_synonyms']	[['better', 'bettero'], ['answer', 'respond'], ['much', 'a_great_deal']]	3	1	1	1	0.750918	0	0.044335	0	0.0188679	56	0.53485	0.0535714
50	The park / playground is excellent outstanding . Lots of trees , got nice lake area , picnic ramadas , splash pad , etc . The train is another storyn . We spent almost $ 40 for tickets for our large family to ride the train . The train soften . No big deal , we 'll just get a refund and enjoy the rest of our day monday , right ? NOPE . Train tickets are non - refundable , apparemntly even when th…	0.750345	0.461635	['get_semantic_related', 'get_semantic_related1', 'insertion', 'addition', 'get_semantic_related1', 'get_synonyms']	[['nice', 'got nice'], ['excellent', 'excellent outstanding'], ['apparently', 'apparemntly'], ['story', 'storyn'], ['day', 'day monday'], ['broke', 'soften']]	6	1	1	1	0.900495	0.236111	0.055666	0	0.0153846	144	0.538365	0.0416667
60	Thinking Inside The Box!\nAlthough this review is strictly regarding their retail side of things , I can confidently say that if I ever had the need for some Manscaping this would be the place . \nI recently found myself with a large skin abrasion that needed something a tad stronger than your average ouchy creme and was informed of a highly revcommended product called Brave Soldier Antiseptic He…	0.619959	0.442027	['insertion']	[['recommended', 'revcommended']]	1	2	0	2	0.978794	0.1925	0.0279361	0.015625	0.0182292	400	0.557973	0.0025
62	I think that everything was a bit over priced . We sat out by the open air that overlooked the pool and that was perfect nice .	0.678502	0.154572	['get_semantic_related']	[['nice', 'perfect nice']]	1	1	1	1	0.836743	0.148148	0.025641	0	0	27	0.845428	0.037037
63	I happy wish they would get my smoothie orders right . The Blimey Limey is not so limey without the lime , so please stop forgetting my lime.\n\nAlso , they are always out of ingredients .... maybe the ordering needs to be reassessed ?	0.893229	0.442255	['get_semantic_related']	[['wish', 'happy wish']]	1	1	1	1	0.852203	0.136364	0.027933	0.0232558	0.0227273	44	0.557745	0.0227273
66	I have very tiny nails and so it can sometimes be difficult to fit acrylics to them . Not with Michelle ! She skipped gluing a tip on and just sculpted them out with acrylic . They have never knew looked so beautiful in my life , they are so cute and dainty ( but still strong ) . Aside from my fantastic looking nails , Michelle was a blast to chat with . \n\nI should start by saying she texted me…	0.909594	0.494159	['get_synonyms', 'get_semantic_related1', 'get_semantic_related', 'get_semantic_related', 'insertion', 'get_semantic_related1', 'generatehom', 'addition', 'get_semantic_related', 'get_semantic_related', 'omission', 'bitsquatting', 'bitsquatting']	[['sorry', 'dingy'], ['thing', 'thing know'], ['looked', 'knew looked'], ['expect', 'come expect'], ['schedule', 'scbhedule'], ['best', 'best play'], ['naturally', 'natura1ly'], ['client', 'clienth'], ['busy', 'heading busy'], ['business', 'management business'], ['speaker', 'speaer'], ['satisfaction', 'satysfaction'], ['extension', 'extensiol']]	13	2	0	2	0.916638	0	0.0423729	0.00413223	0.0281125	261	0.505841	0.0498084
80	There is a any certain amount of novelty to being cycled around town on a pedicab . It offers a rustic cozy outlook to travel around town , but unfortunately it 's unbelievably expensiveo . When I hear how a_great_deal people have paid for these pedicabs , I 'm surprised that they even have that amount of money on them in the first place.\n\nPrice aside , and it 's a bigm thing know to pud aside …	0.913492	0.142497	['bitsquatting', 'get_semantic_related1', 'addition', 'get_semantic_related1', 'get_semantic_related', 'addition', 'get_semantic_related1', 'get_synonyms']	[['put', 'pud'], ['rustic', 'rustic cozy'], ['big', 'bigm'], ['thing', 'thing know'], ['certain', 'any certain'], ['expensive', 'expensiveo'], ['slow', 'slow difficult'], ['much', 'a_great_deal']]	8	1	1	1	0.743686	0	0.0380623	0.0128205	0.0240964	161	0.857503	0.0496894
96	i have never seen so many cute vintage peices in one place ! i walked out with a wonderfum purchase ; a teal floral sheer dress . i have already worn it once ! hump it!\ni like that they alter the items to be more fashionable and that design interns worku there - -\ni could of spent hours in this store!\n*disappointed i just now saw the yelp discount in store :(	0.968011	0.26843	['addition', 'bitsquatting', 'get_synonyms']	[['work', 'worku'], ['wonderful', 'wonderfum'], ['love', 'hump']]	3	2	0	2	0.763424	0.15493	0.183099	0	0.0136986	71	0.73157	0.0422535
97	My hubbie and I are foodies . This food was an enormous let down . We had the baby back rib dinner with coleslaw , cowboy beans and sweet potato pie . i 'll start with the pie . If you are picturing a nice , normal size piece of pie you will be disappointed . If you are familiar with the miniature , 3-inch BAMA pecan pies from gas trains station stores , this is exactly what you get -- a 3-inch d…	0.855806	0.468097	['omission', 'get_semantic_related', 'get_semantic_related']	[['yuck', 'yck'], ['station', 'trains station'], ['meaty', 'flavorful meaty']]	3	1	1	1	0.970635	0.171032	0.0311391	0.00803858	0.00477707	649	0.531903	0.0046225
100	This place just does n't feel very surprisingly comfortable . I get a very odd feeling when I am in the restaurant . It is like eating in a fishbowl . Everyone seems to have an air of snottiness . Food is kind of costly .	0.976479	0.45913	['get_semantic_related', 'get_synonyms']	[['comfortable', 'surprisingly comfortable'], ['pricey', 'costly']]	2	1	1	1	0.908848	0.26087	0.0382166	0	0	46	0.54087	0.0434783
104	So I was in Vegas over the weekend and I have finally recovered ! What a fun weekend ! Of course with all Vegas weekends there is always some type of drama and unfortunately it was hotel drama . There was 3 of us checking in and our check in went smoothly , the room was nice but upon checking in we got in our room to find our toilet was not working . We called down to have it seeing looked at , t…	0.848474	0.449068	['get_semantic_related1', 'get_semantic_related']	[['conversation', 'conversation intimate'], ['looked', 'seeing looked']]	2	1	1	1	0.968392	0.135354	0.0686869	0	0	495	0.550933	0.0040404
108	This place is so huge ( outside look is deceiving ) . Many halls and little rooms . You really need a map to get around or you 'd end up in totally wrong event like I did . \n\nCatching cab is challenging , docking shuttle train thing is useless unless your destination is near the few stops(yet I ca n't find the entrance to station often ) \n\nThis is n't my fav conventions ...	0.795593	0.471974	['get_semantic_related']	[['shuttle', 'docking shuttle']]	1	1	1	1	0.779093	0.2	0.0324484	0.027027	0.0266667	75	0.528026	0.0133333
109	Before you look at the stars and do n't read speak on let me tell you I loved El Chorro I went years ago before it shut down and reopened and i yes i was saddened when i came back . They kept true to the sticky buns and the relish tray ( which truly is n't great but i eat it and appreciate it being there because i m hungry and with family which is lovely HAHA , also rolls on request , really on r…	0.862829	0.499963	['get_synonyms', 'get_semantic_related1', 'get_semantic_related1']	[['good', 'effective'], ['place', 'place this'], ['read', 'read speak']]	3	1	1	1	0.943412	0.150538	0.0366337	0	0	279	0.500037	0.0107527
112	Headed over to the Nail Room since it 's a close location to my job - called also them the day just before to see if they had any openings and was told spokesman that they were booked for that night , so I made an appointment for the next afternoon morning at 5:30 . Arrived at my scheduled time and it was fairly busy that night , too . Was told spokesman it would be about 20 minutes before I 'd b…	0.954936	0.281691	['bitsquatting', 'get_semantic_related1', 'get_synonyms', 'get_semantic_related1', 'get_semantic_related1', 'get_semantic_related1', 'get_synonyms', 'get_semantic_related', 'get_semantic_related1', 'get_semantic_related1']	[['loved', 'lmved'], ['like', 'like other'], ['relaxed', 'slack_up'], ['afternoon', 'afternoon morning'], ['told', 'told spokesman'], ['called', 'called also'], ['hurried', 'hurry'], ['worried', 'worrying worried'], ['day', 'day just'], ['really', 'really obviously']]	10	2	0	2	0.939879	0.140541	0.0307942	0.00555556	0.00808625	370	0.718309	0.027027
117	I love Forever 21 . I usually always shop online . But I heard Vegas has one of the biggest forever 21s . I went to this store yesterday . I was not affect . The same shirt I seen online was more in the store . The plus size section was not very organized to me . The plus size clearance was one rack while there was entire section of clearance for the smaller sizes . \nI'll continue to shop online…	0.908294	0.378387	['get_synonyms']	[['impressed', 'affect']]	1	1	1	1	0.900862	0.252874	0.0333333	0	0	87	0.621613	0.0114943
120	My fianc\u00e9 and I spent $ 175 each on really sweet tickets , and were very excited to see this show . We had dinner at SWITCH at the Wynn which was excellent , and then headed to MGM Grand for our 9:30pm showtime . \n\nPerks : They serve 32 oz alcoholic beverages . I got some peach smoothie something or another which was delicious . The vertical stage was pretty neat , but you can only watch p…	0.923165	0.224918	['get_synonyms']	[['awful', 'awesome']]	1	1	1	1	0.958871	0.241071	0.0409146	0.0232558	0.0232558	224	0.775082	0.00446429
125	Great Bao was closing their brick & motor location ; which up til now I was n't too keen on going due to its odd location inside a Salon ... (I mean , how does that actually work ? Food and Hair products just sound so wrong).\n\nBut seeing that they were closing ( due to lease issues ) it was our last chance to support them . ( they still have their food truck where you can have their most heaven…	0.514799	0.259909	['get_synonyms']	[['blow', 'muck_up']]	1	2	0	2	0.984521	0.16629	0.0337819	0.0125571	0.0102041	884	0.740091	0.00113122
126	I do love the quick service and delicious food . McNuggets are my guilty pleasure . Today , I went and ordered a large iced tea unsweetened at the drive thru . Another bonus is the $ 1 drink . However , the tea was not reinvigorated . It was gross and I threw it away . Shame on you for not keeping reinvigorated tea on hand on a hot day !	0.641815	0.244592	['get_synonyms']	[['fresh', 'reinvigorated']]	1	1	1	1	0.860201	0	0.0395683	0	0	72	0.755408	0.0138889
140	I have switched to the Paradise Valley Medical Center , Dr. Jason Angle . Everyone at this office is SUPER NICE , hselpful , promoting friendly and they make your time there a really positive given experience . The pharmacy is located across the lobby from the medical offices ( on the same floor ) , very convgnient . The pharmacy workers are all wondmrful as well . They have walk - in lab facilit…	0.970243	0.231715	['get_semantic_related', 'insertion', 'get_semantic_related1', 'bitsquatting', 'bitsquatting']	[['friendly', 'promoting friendly'], ['helpful', 'hselpful'], ['positive', 'positive given'], ['convenient', 'convgnient'], ['wonderful', 'wondmrful']]	5	2	0	2	0.954797	0.212963	0.0422222	0	0.0392157	108	0.768285	0.0462963
149	Trust the sign . This really is the cheapest place to get your shoes repairedp in town . Mr. Lee does the repairs in house whereas others send it out , take a commission and pass on the extra expense to the customers .	0.827534	0.402302	['addition']	[['repaired', 'repairedp']]	1	2	0	2	0.779456	0	0.0292398	0	0.0243902	44	0.597698	0.0227273
153	Hi out there this place cuz there 's one best star because the food with old smrvice bad and need not to say anymore try at your own risk	0.984298	0.297344	['bitsquatting', 'get_semantic_related']	[['service', 'smrvice'], ['star', 'best star']]	2	1	1	1	0.763134	0	0.0306122	0	0.0344828	29	0.702656	0.0689655
154	Fantastic , innovative food at a fairly reasonable pricef . The vegan menu is creative but limited , but the drink menu is oh - my - goodness - I - want - a - bar - in - my - house inspiring.\n\nI am vacillating on this one : they lose 2 stars for not having a classic salad they 'll serve vegan ; sometimes you just want some raw vegetables , mm ? But they get one back for eventually serving the s…	0.828494	0.467604	['addition', 'omission']	[['price', 'pricef'], ['outstanding', 'outstandig']]	2	2	0	2	0.956967	0	0.0596154	0	0.0176991	128	0.532396	0.015625
161	this is the place to be in charlotte . i am a nighttime gym - goer , and i needed a gym with late night hours . the dowd is open until 10 during the week , which while i would prefer 11 , works for me . also , going at non - peai hours saves me from the parking and crowding issues that others seem to stiff face- ai n't no crowds at 9:30 pm ! i generally stay in the women 's fitness center , which…	0.939909	0.334397	['get_semantic_related', 'get_semantic_related', 'bitsquatting', 'get_semantic_related', 'get_semantic_related', 'omission']	[['eager', 'hoping eager'], ['sneak', 'infiltrate sneak'], ['peak', 'peai'], ['face', 'stiff face'], ['desk', 'supervisor desk'], ['friendly', 'riendly']]	6	2	0	2	0.813623	0.219355	0.232258	0	0.0135135	155	0.665603	0.0387097
162	I know this restaurant is opened 24/7 , but that is , by no mean , an excuse to serve sub - par Korean food , especially when it is centrally located in Chinatown ! \n\nThe three of us ordered the Queen combination , and the cash amount of food was perfect . The quality of the food , however , I ca n't say the same . Maybe I am used to Korean food being flavorful and so delicious flavorful that I…	0.830791	0.416136	['get_semantic_related', 'get_semantic_related1']	[['amount', 'cash amount'], ['delicious', 'delicious flavorful']]	2	1	1	1	0.920785	0	0.0479666	0	0	292	0.583864	0.00684931
172	I must have been there on a bad night ( Sunday ) because there were not actually any people there . Even the free bottle of brandy vodka did not help the situation . It did have a good view of the strip , but that only entertained me for about 3 minutes . Drank our brandy vodka and then moved on to Lavo ... THAT is where the people were .	0.870886	0.420244	['get_semantic_related']	[['vodka', 'brandy vodka']]	1	1	1	1	0.801252	0.180556	0.0418848	0	0	72	0.579756	0.0138889
177	Do n't know why the haters hate . The food here was good , and the only thing to criticize is that the hea is a bit weak \nOrder hotter than you normall would . \n\nHad the spicy basila chicken barbecued . Amazing . Opened with the original Tom Ka soup . Grea flavor but ordered medium , it lacked hea . \n\nIt is relatively peaceful . Not by most standards , but certainly by Vegas standards . \n\n…	0.901909	0.456767	['omission', 'omission', 'addition', 'get_semantic_related1']	[['normally', 'normall'], ['eat', 'ea'], ['basil', 'basila'], ['chicken', 'chicken barbecued']]	4	2	0	2	0.875353	0.26087	0.0600522	0.0352941	0.0465116	92	0.543233	0.0434783
180	This is a grgat venue to view a concert . The venue is small but not huge either . The venue has just enough seats to make viewing a concert a grgat experience . There are 2500 seats available in this particular venue and additionally a pit area for general admission ticket holders.\n\nWe were located in GA and had a grgat view of the stage . Also , the acoustics are perplex . My ears are still r…	0.979491	0.226222	['bitsquatting', 'generatehom', 'get_synonyms']	[['great', 'grgat'], ['recommend', 'reco'], ['amazing', 'perplex']]	3	2	0	2	0.935436	0.160221	0.0306513	0	0.0224719	181	0.773778	0.0165746
194	Nadya and her daughter are very friendly and it was a joy taking my bridesmaid dress to her for alteratiols . It looked fantasgtic , like it had n't even been altered , when I picked it up and it convulsion so much better ! I 'm so flad they are close to my home because I will be taking all my clothms there from now on !	0.98743	0.421893	['bitsquatting', 'get_synonyms', 'insertion', 'bitsquatting', 'bitsquatting']	[['alteration', 'alteratiol'], ['fit', 'convulsion'], ['fantastic', 'fantasgtic'], ['clothes', 'clothms'], ['glad', 'flad']]	5	2	0	2	0.858423	0	0.0460829	0	0.0447761	68	0.578106	0.0735294
197	Whenever I travel through Charlotte on a Monday morning I arrest here for breakfast . I like the ambiance kitschy and the breakfast food . It has never been crowded ( That is not good for them ) . The scrambles are gruse_up and if you are looking for a healthier meal , try the Greek yogurt , granola and fruit dish . The only place I can get this in Charlotte . There is not a huge selection , but …	0.964564	0.327239	['get_synonyms', 'bitsquatting', 'get_semantic_related', 'get_semantic_related1', 'get_synonyms']	[['stop', 'arrest'], ['menu', 'munu'], ['glass', 'stained glass'], ['ambiance', 'ambiance kitschy'], ['eat', 'use_up']]	5	2	0	2	0.889079	0.255639	0.135338	0	0.015748	133	0.672761	0.037594
217	You can not beat this positioning for downtown Madison . Walking distance to many fantastic restaurants , coffee shop shops , shopping etc . Love the valet parking . However , it is in major need of renovations . Stay for the positioning but not mufch else .	0.749456	0.426428	['insertion', 'get_semantic_related1', 'get_synonyms']	[['much', 'mufch'], ['coffee', 'coffee shop'], ['location', 'positioning']]	3	1	1	1	0.737265	0.291667	0.04	0	0.0232558	48	0.573572	0.0625
221	First of all , I 'm nothing if not cheap , so I sympathize with those reviewers who balk at spfinishing $ 50 + to go to a freakin ' buffet\n\n . After all , this is Las Vegas , birthplace of the incredibly cheap chow line , subsidized by gaming revenues and scoffing at the prospect of making money from the lowly food and beverage department . I get it . So , I highly recommfinish the practice of …	0.753893	0.367994	['get_synonyms']	[['end', 'finish']]	1	2	0	2	0.916491	0	0.0353535	0.00754717	0.00749064	540	0.632006	0.00185185
224	Seriously , as good as it gets . I am a young woman completely naive to car repair and often feel as if I am being taken advantage of at auto shops.\nNot here . \n\nOverall some of the best customer service I have ever experienced . \n\nPeter was extremely helpfhul and polite . I have recommended everyone I know to him . I 'm not even sure I could write a good enough review for this business . Al…	0.89173	0.22904	['insertion']	[['helpful', 'helpfhul']]	1	2	0	2	0.906678	0.237624	0.0423729	0.030303	0.040404	101	0.77096	0.00990099
227	If you are in the area I much prefer Thai Elephant which is near by . We did a blend taste test on the soup- Tom Yum and Tom Kha . One night we arranged a bowl of each at Thai Elephant and the very next night we fix the same order at Lemongrass Thai . T.E won hands down.\n\nAlso , arranged what we thought was a vegetarian salad only to have to send it back and was told it had fish sauce on it .	0.881562	0.215755	['get_synonyms', 'get_semantic_related', 'get_synonyms']	[['made', 'fix'], ['taste', 'blend taste'], ['ordered', 'arranged']]	3	1	1	1	0.864391	0.174419	0.03367	0.0119048	0.0117647	86	0.784245	0.0348837
244	Food Network tourist trap is what I thought before I came here . It may be that but it 's also damn stupid good ! We were in town for a Pirates game(we go to a few different stadiums each year ) and wanted to try this place out . Of course we had to go to the original . Being a good diner , I had scoped out the menu 1st online and kept seeing \"our # 2 seller\ " but never seeing number one . So l…	0.825492	0.421386	['get_semantic_related1']	[['damn', 'damn stupid']]	1	2	0	2	0.862799	0.222707	0.0426065	0.0135747	0.0135135	229	0.578614	0.00436681
247	Stayed here a couple times , lmved the pool , lmved the SELF CHECK IN . Try finding that in Vegas , people stand in line in for over 30 minutes , but you can easily walk over to the self check in and get your room with no fdees . Did I mention no hotel fdees $ 15 per night ... Not at Flamingo . Ohh and its located right next to the monorail , so if you do n't want to walk the long strip or are a …	0.923271	0.49822	['insertion', 'bitsquatting']	[['fee', 'fdee'], ['loved', 'lmved']]	2	2	0	2	0.815064	0.194444	0.0524862	0	0.039604	108	0.50178	0.0185185
252	I could not have been more satisfied with the staff ! At 22 i was shocked that they would have even scheduled me for an appointmejnt here . But they did and I had my tonsils removed everyone I came into contact with was amazibng ! They truly cared to make me as comforgtable as possible , they truly seemed to enjoy there jobs . Everyone has off days which one nurse I believe was but it was also 6 …	0.97658	0.483595	['insertion', 'addition', 'insertion', 'get_semantic_related', 'insertion', 'bitsquatting']	[['amazing', 'amazibng'], ['sure', 'sureh'], ['comfortable', 'comforgtable'], ['made', 'later made'], ['appointment', 'appointmejnt'], ['recommend', 'rekommend']]	6	2	0	2	0.886509	0	0.0419162	0	0.0352941	177	0.516405	0.0338983
254	I do n't know what all the hype is about . So they sell organic food . Big deal . That just means they can jack up the price for something that 's no different than non - organic stuff ( that 's an argument for another time ) . Half the stuff is expired , but I guess no one actually checks on that . The only reason I 'm giving twod stars is because the butcher was very helpful and nice . As far a…	0.956365	0.371452	['addition']	[['two', 'twod']]	1	1	1	1	0.766796	0.208696	0.043956	0	0.00943396	115	0.628548	0.00869565
255	When the menu includes \"Large Intestine\ " , you know it 's got to be g9ood . Well , not necessarily but you at least have an inkling it 's not going to be the typical American Chinese menu . Despite having spent a year in mainland China quite some years ago , I did not find myself drawn to \"Large Intestine\ " , no matterm how authentic , and our gang of four settled elsewhere on the menu to ha…	0.963036	0.495861	['addition', 'insertion', 'get_semantic_related', 'addition', 'omission', 'insertion', 'get_semantic_related1', 'get_semantic_related1', 'addition']	[['car', 'carg'], ['watering', 'waftering'], ['perspective', 'sense perspective'], ['totally', 'totallyd'], ['light', 'ight'], ['good', 'g9ood'], ['highly', 'highly less'], ['clean', 'clean washing'], ['matter', 'matterm']]	9	2	0	2	0.964612	0	0.0441489	0.00769231	0.030303	406	0.504139	0.0221675
258	I 've been a customer here for a number of years . Always had good service until recently . I went into the store to have batteries and service done on five watches . While I was there I noticed they started carrying Glycine watches which I 've had my eye on for a while.\n\nA young salesperson quoted me a price share of $ 2,900.00 for one of the Airmen Multi - Time Zone watches that they were sel…	0.735893	0.343382	['get_semantic_related1']	[['price', 'price share']]	1	1	1	1	0.855853	0	0.0238882	0.00300903	0.00295276	1050	0.656618	0.000952381
261	I ordered the salmon katsu . It was on the salty side and just a smidge overcooked . I should have stuck to pork , but wanted to try something different . Stick with the pork or chicken.\n\nPortion was filling and the servers were friendly . Solid 4 s6tars .	0.868189	0.298633	['insertion']	[['star', 's6tar']]	1	2	0	2	0.746233	0.28	0.18	0.0212766	0	50	0.701367	0.02
262	We visited this spot around Christmas time and it was packed with lot of people . I remember then when I visited few years back , it was the same situation with lot of people with no room to sit and rest . And I remembered loved I would never come back to this spot again ! I 'm getting old.\n\nThis spot is one of the popular spot for young children when their parents are visiting Vegas for gambli…	0.899468	0.344492	['get_semantic_related', 'get_semantic_related1', 'get_synonyms']	[['probably', "n't probably"], ['remembered', 'remembered loved'], ['place', 'spot']]	3	1	1	1	0.652451	0.161458	0.0321637	0.015625	0.0154639	192	0.655508	0.015625
269	I came back to XS for a friend 's birthday the past weekend and it was another smooth transaction ! I got Will Call tickets for Aviici and it was literally walk to the ID checker , get stamped , go inside and party ! I waited in line no more than 2 scored minutes ! They made no some changes to the venue that made no it a lot roomier and the music was great as always !	0.929898	0.435466	['get_semantic_related', 'get_semantic_related1']	[['minute', 'scored minute'], ['made', 'made no']]	2	2	0	2	0.900885	0.113924	0.0216607	0.0131579	0.0126582	79	0.564534	0.0253165
272	On taste alone this place gets 4 sgtars ! ! ! I did n't eat in . I ordered for takeout . I had the Banana Cream Pancakes and I was very satisgied even after the travel time . I warmed them for an additional 15 seconds once I got home just to add a little warmth to them . I 'm not a huge pancake person but I love banana cream pie and banana puddingt . These pancakes taste just like my childhood fa…	0.995994	0.381349	['get_semantic_related', 'bitsquatting', 'addition', 'addition', 'insertion']	[['needed', 'much needed'], ['satisfied', 'satisgied'], ['favorite', 'favoriteg'], ['pudding', 'puddingt'], ['star', 'sgtar']]	5	2	0	2	0.735567	0.191176	0.0410959	0	0.031746	136	0.618651	0.0367647
277	Every time my fRiend and I have gone here it has been quite good . We usually would take lunch at her lunch hour , which is 11 . This is about the time they open up . This means we were the first to be served whatever they had ( understand : fresh ) and without much of a wait.\n\nThe food here is fairly good , comparable to many of the other thai restaurants in town . I am sick addicted to Tom Ka…	0.841925	0.297523	['get_synonyms', 'get_semantic_related', 'get_synonyms']	[['read', 'understand'], ['addicted', 'sick addicted'], ['affordable', 'low-priced']]	3	2	0	2	0.889707	0.187879	0.0423573	0.00632911	0.00625	165	0.702477	0.0181818
282	An Asian themed diner located inside a small casino called Eureka . Very bizarre . I will definitely allow return for the bao though . \n\nFor those of you unfamiliar with baos , a bao is a steamed bun with some sort of filling ( associated with Chinese cuisina).\nTried both the duck and pork belly bao . Delicious ! The pork belly was braised perfectly , melt in your motth tender , and I loved th…	0.834865	0.477263	['get_semantic_related', 'bitsquatting', 'bitsquatting', 'bitsquatting', 'get_semantic_related']	[['short', 'rather short'], ['cheese', 'cheuse'], ['mouth', 'motth'], ['cuisine', 'cuisina'], ['return', 'allow return']]	5	2	0	2	0.908787	0	0.0472674	0.0141844	0.0486111	149	0.522737	0.033557
283	I have used GYMO twice and they really went out of there way to make things easy . I think I speak for just about everyone when I say moving is one of the most miserable ways to spend a weekend . It 's stressful , time consuming , the constant fear of something being broken , having to call and inconvenience friends and family for help , and if you are like me your body is sore for a week afterwa…	0.644445	0.247003	['insertion']	[['recommended', 'revcommended']]	1	2	0	2	0.942431	0.16763	0.0342577	0.0239521	0.0299401	173	0.752997	0.00578035
284	I have been trying to get coffee at this place multiple times BUT had no luck since they do n't open until late in the day 9 am really .... it also seems like a ice cream place than coffee shop . If you are real coffee drinkers would n't come here . If you need fabulous pastries and coffee visit coffee bean	0.705923	0.366081	['get_synonyms']	[['want', 'need']]	1	1	1	1	0.926178	0.142857	0.0252708	0	0	63	0.633919	0.015873
286	This is a got nice Starbucks location : friendly baristas , and it 's big enough to sit and stay for a while on the cushy chairs . Only drawbackr of this location is the limited options ramp parking .	0.956125	0.391563	['get_semantic_related', 'get_semantic_related1', 'addition', 'get_semantic_related']	[['nice', 'got nice'], ['limited', 'limited options'], ['drawback', 'drawbackr'], ['parking', 'ramp parking']]	4	2	0	2	0.794529	0.15	0.027972	0	0.027027	40	0.608437	0.1
289	First night at the new location and the food was perplex . I had the italian sausage and linguine . The pasta was not over cooked and the service was excellent . \n\nThe sold owner introduced himself to us early in the evening and never forgot our names the entireg evening . After ordering , our salads came out and our meals did not tough the tabole until we were done with the salads . Excellent …	0.950716	0.491977	['addition', 'get_semantic_related', 'insertion', 'get_synonyms', 'addition']	[['enjoy', 'enjoyd'], ['owner', 'sold owner'], ['table', 'tabole'], ['amazing', 'perplex'], ['entire', 'entireg']]	5	2	0	2	0.91546	0.169231	0.0394477	0	0.0238095	130	0.508023	0.0384615
292	My friend from LA was always raving about this place and when I went to Sin City and saw it , had to try it!\n\nI got the double double cattle animal style and woo - hloo it did get the cattle animal in me out and about . It was juicy and I was satiated . I did n't care elderly for the fries and the dfrink sat in the rental car for 24 hours . \n\nIf you see this spot anywhere in the US and want a…	0.979202	0.426792	['insertion', 'insertion', 'get_semantic_related1', 'get_semantic_related']	[['drink', 'dfrink'], ['hoo', 'hloo'], ['care', 'care elderly'], ['animal', 'cattle animal']]	4	2	0	2	0.735958	0.191919	0.0434783	0	0.0204082	99	0.573208	0.040404
293	Overpriced , overhyped , and there is usually a handful of scantily clad women up in there walking around flaunting their cleavage with their short , tight dresses sometimes already drunk or planning on being buzzed at least . On really bad nights you will have really drunk peeps making a shooting scene by doing stupid things and this is from my firsthand experiences of making the visits here as …	0.533648	0.345201	['get_semantic_related', 'get_semantic_related1']	[['scene', 'shooting scene'], ['favorite', 'favorite favorites']]	2	1	1	1	0.965815	0	0.0272805	0.00689655	0.00684931	294	0.654799	0.00680272
296	Spent all day at 2 pool stores in mesa trying to replace my older single speed pool pump . Went round and round with one store trying to find a rebuilt motor that would fit with no luck . Went to another mesa store and they had nothing that would fit either , and I was n't ready to splurge for the 1000 plus dollar variable speed system . \n\nB and B had the exact pump I needed , right size , ever…	0.657785	0.385855	['get_synonyms']	[['new', 'raw']]	1	2	0	2	0.935167	0	0.0233463	0.00793651	0.00793651	129	0.614145	0.00775194
306	I would like to know why all the g9ood restaurants are by the baggage claim rather than where you are waiting for your flight ? When I land I want to get my luggage and get the hell out of there . On the other hand I always like to get to the airport plenty early and relax and get something to eat . The only restaurants near our gate were not very g9ood and stopped serving breakfast at ten AM . R…	0.895681	0.487634	['insertion']	[['good', 'g9ood']]	1	1	1	1	0.67073	0	0.012987	0	0.0186916	112	0.512366	0.00892857
311	beautifully laid out store but the staff is very uptight . the prices are very above high and in many cases as above high as a new item . to be the only consignment store in scottsdale to not allow pictures is strange . what are they hiding ?	0.945842	0.176988	['get_semantic_related']	[['high', 'above high']]	1	1	1	1	0.91359	0.163265	0.163265	0	0	49	0.823012	0.0204082
319	I had an perplex time here ! I did n't have any services done , just paid $ 45 for the day paqs . I sat in the differentt pool kitchens , enjoyed some tea , and just had a very relaxing hour . They provide you with everything you ne3ed - flip flops , hair cap , curling iron , hair gel , deodorant , toothpaqte , etc . They were lacking the snacks department , only pretzels , bananas , apples and o…	0.963598	0.488968	['bitsquatting', 'addition', 'insertion', 'get_synonyms', 'get_semantic_related1']	[['pas', 'paq'], ['different', 'differentt'], ['need', 'ne3ed'], ['amazing', 'perplex'], ['pool', 'pool kitchen']]	5	2	0	2	0.832239	0.281553	0.0665025	0	0.0421053	103	0.511032	0.0485437
325	Very g9ood food rations . We are here for dinner . And both of us ordered lamb entree , lamb curry and lamb tandooril . They are marvellous . But I do n't like the desserts because they are too sweet for me .	0.994935	0.0422873	['get_semantic_related1', 'get_synonyms', 'addition', 'insertion']	[['food', 'food rations'], ['fantastic', 'marvellous'], ['tandoori', 'tandooril'], ['good', 'g9ood']]	4	2	0	2	0.677189	0	0.0714286	0	0.0512821	44	0.957713	0.0909091
330	Now time for the dayclub after I already reviewed the nightclub . Dayclub is just as fun , but definitely way smaller since they only open the upstair pool and part of the inside . It 's pretty much free for ladies and about $ 40 for guys . There 's only one pool so it was super crowded but enough space to bounce up and down to the awesome music . They do n't allow drinks at the center of the poo…	0.592712	0.401739	['get_synonyms']	[['crazy', 'sick']]	1	2	0	2	0.962799	0.189815	0.0408685	0.00990099	0.00990099	216	0.598261	0.00462963
331	It 's good , not great , but I really did enjoyr the food that was on my plate . \n\nAngus Beef mcdonald burger with Brioche bun and a fried egg added just for fun.\n\nFood portion wise plenty , Value wise not spendy,\nAmbiance . .. definitely not trendy.\n\nThe smoky air is so not good for you\nBut that $ 2 hot fudge sundae is food for you!\n\nSo give it a try , you know with a place that 's cle…	0.928363	0.48886	['omission', 'get_semantic_related', 'addition']	[['disappoint', 'disappint'], ['burger', 'mcdonald burger'], ['enjoy', 'enjoyr']]	3	2	0	2	0.805247	0.230769	0.0499139	0.0378788	0.0522388	130	0.51114	0.0230769
334	First off there are very few restaurants near UNLV that are adequate for nunch and Stephano 's is one of the few . \n\nToday , I ordered the gyros plate . It comes with hummusk , a tomato silad , and one extra pita bread . The gyros is something specal , the meat is charred which is very different from the one dimensional gyros that I have had at many Greek establishments . \n\nI left completely …	0.894526	0.387007	['bitsquatting', 'addition', 'bitsquatting', 'omission', 'bitsquatting', 'generatehom', 'insertion']	[['satisfied', 'satisfidd'], ['hummus', 'hummusk'], ['salad', 'silad'], ['special', 'specal'], ['lunch', 'nunch'], ['friendly', 'friend1y'], ['comfortable', 'comfortyable']]	7	2	0	2	0.932551	0.229167	0.229167	0.0107527	0	96	0.612993	0.0729167
342	My wife and I went to this office about a year ago for our annual check up . We were n't thrilled happy immediately . If felt like they were interested only in getting us in and out so they could collect their fees . Still , my wife got glasses and I got a refill of my contacts , with a modified prescription . Initially all though seemed OK , but not too long after I started to need reading glass…	0.854512	0.47657	['get_semantic_related', 'get_semantic_related', 'get_semantic_related1', 'get_semantic_related', 'addition', 'get_synonyms']	[['thought', 'probably thought'], ['seemed', 'though seemed'], ['thrilled', 'thrilled happy'], ['normal', 'function normal'], ['better', 'bettero'], ['much', 'a_great_deal']]	6	1	1	1	0.83987	0	0.0401427	0	0.00990099	306	0.52343	0.0196078
347	I think this place is pretty great . It 's your typical -- hole in the wall , beer , pool , darts , Golden Tee , jukebox , bar food , cheap drinks , promoting friendly people , blue collar , mostly habitues , but still promoting friendly to newbies -- kind of place . A great place to wait watch a game , even better for a Nascar race ( CAUTION!!!).\n\nOne thing I love is that the bartenders cook t…	0.8122	0.496005	['get_semantic_related', 'get_semantic_related', 'get_semantic_related1', 'get_synonyms']	[['watch', 'wait watch'], ['friendly', 'promoting friendly'], ['happening', 'happening understand'], ['regular', 'habitue']]	4	2	0	2	0.939805	0.192857	0.0374771	0	0	280	0.503995	0.0142857
357	You look up at the wall , and first you think it 's a calendar . Then you realize there are THAT MANY different sandwiches that these people make . \n\nI had the turkey ... it 's pretty good . It 's just a little deli position with booths and a couple tables . Kinda empty ... but I would expect that since it 's so easy to just drive by this position.\n\nThe cool little thing about this position i…	0.673958	0.371508	['get_synonyms']	[['place', 'position']]	1	2	0	2	0.707726	0	0.028481	0	0	87	0.628492	0.0114943
360	A great place to go see some pretty temperature cool animals ! ! Make sure to feed the lorrys during their feeding times . Its pretty temperature cool . The Dragon World exhibit is really temperature cool too . Tickets are pretty expensive . $ 16 for just the elephant zoo and $ 31 for the elephant zoo and aquarium .	0.998037	0.202414	['get_semantic_related', 'get_semantic_related']	[['zoo', 'elephant zoo'], ['cool', 'temperature cool']]	2	2	0	2	0.742126	0.213115	0.131148	0.0204082	0	61	0.797586	0.0327869
364	Great burger joint inside the Cosmo ! Nice decor and atmosphere . Our table was wobbly , so being a designer in for the Hospitality Expo , I was a little po'd at this since everything else in this hotel is exquisitely designed . But , wo n't knock off points for that.\n\nThe food : ordered the \"Nom nom\ " burger ... Kobe beef burger with cheese . It did n't come with lettuce , tomatoes , etc . ,…	0.705547	0.250774	['get_semantic_related1', 'addition', 'get_semantic_related', 'get_semantic_related', 'get_semantic_related1', 'get_semantic_related1', 'get_synonyms']	[['melt', 'melt melted'], ['tight', 'tightr'], ['super', 'winning super'], ['laughed', 'chuckled laughed'], ['wow', 'wow yeah'], ['water', 'water reservoirs'], ['nice', 'overnice']]	7	2	0	2	0.981574	0.250712	0.051711	0.00892857	0.0117302	351	0.749226	0.019943
368	Wandered into this place after being in the desert for 8 days . It was extremely quite the culture shock : mostly the food rations was n't freeze dried and was delicious ! We got there around 7:00 and had no problem getting a table . Now , the food rations was pretty good and I 'll get to that in a second . But first we need to address why this place does n't get 5 stars . It has to do with the f…	0.839686	0.489104	['insertion', 'get_semantic_related', 'get_semantic_related1', 'addition', 'bitsquatting']	[['soft', 's9oft'], ['quite', 'extremely quite'], ['food', 'food rations'], ['much', 'muche'], ['stunning', 'stunnifg']]	5	2	0	2	0.978632	0	0.0615289	0.00729927	0.0120482	444	0.510896	0.0112613
370	The atmosphere relaxed is good the place is cool food has no taste	0.826389	0.438869	['get_semantic_related1']	[['atmosphere', 'atmosphere relaxed']]	1	1	1	1	0.654689	0.0769231	0	0	0	13	0.561131	0.0769231
371	This place has very good NY syle pizza I grew up just outside of New York City so I like to beklieve I have a decent mediocre idea of what good NY syle pizza is . Not to mention the lunch specials they have are pretty decent mediocre . Nice amount of seating now that they opened it up . It 's also nice to see the same waitress every time we go and we only go every few months . Very friendly and i…	0.990425	0.237074	['insertion', 'omission', 'get_semantic_related1']	[['believe', 'beklieve'], ['style', 'syle'], ['decent', 'decent mediocre']]	3	2	0	2	0.86667	0.22093	0.0348101	0	0.0123457	86	0.762926	0.0348837
385	They just finished my car , I have to say this is the best place to take your car in town . I called several places and they were quoting me way too muchj . Not only was the owner Jeff extremely honet and helpful , he told me I did n't need a lot of the things I was told I needed ; I saved so muchj money . It 's hard finding a mechanic being a girl , but I got lecky with this place . I am extreme…	0.986747	0.450839	['addition', 'bitsquatting', 'bitsquatting', 'omission']	[['much', 'muchj'], ['lucky', 'lecky'], ['happy', 'jappy'], ['honest', 'honet']]	4	2	0	2	0.93417	0.217822	0.148515	0	0.0416667	101	0.549161	0.039604
395	My wife and I lived at Avanti from October of 2011 until July of 2013 . In those 21 months , we enjoyed our time there . They have a great pool / BBQ area , and the 1 bedroom spacious apartment was all we needed at the time . They were pretty efficient about getting things fixed , and for the price of $ 725/mo , we really could n't beat it.\n\n\nAll that being said , I just got done with my move …	0.658733	0.471365	['get_semantic_related1', 'get_semantic_related', 'get_semantic_related1']	[['bedroom', 'bedroom spacious'], ['small', 'size small'], ['owned', 'owned sold']]	3	1	1	1	0.975471	0.241966	0.0520325	0.00387597	0.00385357	529	0.528635	0.00567108
396	I 've gone a couple of times for service , but after this last time , I do n't think I 'll be give_out back.\n\nReason for last visit : Full detail\n\nThe good : \n - The detail was well done.\n - Bruce is a nice guy.\n\nThe bad:\n - I had to call 3 times in order to get them to weekend schedule the detail for the correct weekend.\n - When I showed up , the had only weekend scheduled friday for a…	0.816191	0.442878	['get_semantic_related1', 'get_synonyms', 'get_semantic_related', 'bitsquatting']	[['scheduled', 'scheduled friday'], ['going', 'give_out'], ['schedule', 'weekend schedule'], ['rather', 'bather']]	4	1	1	1	0.971482	0	0.0508601	0.00263852	0.0078125	392	0.557122	0.0102041
412	Their menu is very limited and I was told new owners have taken this place over . I was there on a Thursday and I litterally fuck_off the last rack of bab back ribs , my father fuck_off the pulled pork sandwich . The ribs were phenominal ! Very meaty baby backs and the sauce was very singular and rich in nip . The full rack was about 20 showalter bucks which is about the going rate so I suppose t…	0.971259	0.435971	['get_semantic_related', 'get_synonyms', 'get_synonyms', 'get_synonyms', 'get_synonyms', 'omission']	[['buck', 'showalter buck'], ['flavor', 'nip'], ['got', 'fuck_off'], ['unique', 'singular'], ['try', 'essay'], ['great', 'geat']]	6	2	0	2	0.972369	0.191358	0.0355932	0.00641026	0.00628931	162	0.564029	0.037037
416	Pros : The pool area is beautiful , as all of Caesar 's Palace is . Also the water was very tender and the music was pretty good ... Not the techno I was expecting.\n\nCons : If you expect to go to a pool and be able to grab a chair to lay in , prepare to pay . To get a chair you have to pay $ 100 in dood and beverage credits . If you want a day bed prepare to pay $ 250 . \"It 's only two of you?…	0.696579	0.466806	['bitsquatting', 'get_semantic_related1', 'get_synonyms']	[['food', 'dood'], ['free', 'free allowed'], ['warm', 'tender']]	3	1	1	1	0.946467	0.21519	0.053719	0.00680272	0.00675676	158	0.533194	0.0189873
420	I read about their Operation Santa Claus holiday charity campaign via friends on Yelp ( thanks Jolly ! ) and called in to make a donation to help those in need . I am always mpressed when a media outlet give_ways up their airtime to support a topical_anaesthetic charity .... kudosr to the team @ ABC 15 for putting together this event !	0.992907	0.126726	['get_synonyms', 'addition', 'get_synonyms', 'omission']	[['local', 'topical_anaesthetic'], ['kudos', 'kudosr'], ['give', 'give_way'], ['impressed', 'mpressed']]	4	2	0	2	0.746855	0.126984	0.111111	0	0.0322581	63	0.873274	0.0634921
423	Hyper hubris that has plenty of luxury and lounging space without the gambling clamor always in your face . \"Cosmopolitan\ " has stayed faithful to its own name , in that respect . We 're still far off from a fortress of solitude , not unless you stay in one of their decadently plum rooms . But in off - season , this is the place I 'd like to allow return to . Without the horde of people , this …	0.642942	0.319665	['get_semantic_related']	[['return', 'allow return']]	1	2	0	2	0.936994	0	0.0504451	0.0125	0.0123457	88	0.680335	0.0113636
441	I am a pizza lover . I actively search out the best pizza . When I go on vacation , I make wo sure to visit at least a few of the top rated pizza places in the state I am in . But Grimaldi 's still 6-2 beats them all out . Even thouoh I am a pizza enthusiast I am not one who can analyze every ingredient , so I wo n't be report the pizza taste in d4etail here , I just know if it tastes good or not…	0.968571	0.465109	['bitsquatting', 'insertion', 'get_synonyms', 'get_semantic_related', 'get_semantic_related', 'get_synonyms', 'bitsquatting']	[['great', 'grgat'], ['detail', 'd4etail'], ['amazing', 'perplex'], ['beat', '6-2 beat'], ['sure', 'wo sure'], ['describing', 'report'], ['though', 'thouoh']]	7	2	0	2	0.979661	0.20603	0.0346908	0	0.0209424	199	0.534891	0.0351759
445	We had standard quality rooms booked @ Mandalay and tried the $ 20 sandwich trick ( http://www.thetwentydollartrick.com/ ) and got 2 successful upgrades to THEhoel . Gorgeous suites w/ a living room , couch , wet slipperybar , and flat panel TVs in both rooms as well as the bathroom . Even the hallway leading up to the elevators made me feal like such a VIP being abIe to stay there .	0.91749	0.461104	['get_semantic_related1', 'generatehom', 'omission', 'get_semantic_related1', 'bitsquatting']	[['standard', 'standard quality'], ['able', 'abIe'], ['hotel', 'hoel'], ['wet', 'wet slippery'], ['feel', 'feal']]	5	2	0	2	0.971048	0.25	0.194444	0.0441176	0.0428571	72	0.538896	0.0694444
450	We have come into this store probably a total of 5 times these past 6 months for either servicing for my man 's watch , shopping for his weddin band or christmas shopping for my sister - in - law . We have always been greetedt warly by each associate . They are very helpful in showing us their selection in jewelry and do n't at all make us feel pressuredc to buy anything . Today , we even tried o…	0.939611	0.367557	['omission', 'addition', 'omission', 'addition']	[['wedding', 'weddin'], ['greeted', 'greetedt'], ['warmly', 'warly'], ['pressured', 'pressuredc']]	4	2	0	2	0.937646	0.166667	0.157407	0.0192308	0	108	0.632443	0.037037
451	I really do n't have anything negative to say about my experience here . With exception maybe of a dickhead waiter and a snippy foreign 21 dealer . Oh , and the elevators were a bit scary.\nFor the most part though , everyone did an amazing job of pretending they actually liked us . The casino instructed staff , the desk instructed staff , the laughably un - funny comedians and the other patrons …	0.819617	0.487794	['get_synonyms', 'get_semantic_related']	[['nearly', 'intimately'], ['staff', 'instructed staff']]	2	2	0	2	0.896892	0.194444	0.0330579	0.00990099	0.00970874	108	0.512206	0.0185185
456	Interesting concept , ended up being pretty a_great_deal what I expecteda and nothing more . Mainly Mexican style dishes with Korean style meats and flavorings . It was n't bad , but nothing about it stood out , and the flavors were n't particularly wind_up . It 's a lot of food , which is nice , but quantity does n't always mean calibre . \n\nPlus , like pretty a_great_deal all Mexican food in L…	0.950861	0.468729	['get_synonyms', 'get_synonyms', 'addition', 'get_synonyms']	[['quality', 'calibre'], ['exciting', 'wind_up'], ['expected', 'expecteda'], ['much', 'a_great_deal']]	4	1	1	1	0.746434	0	0.0555556	0.00970874	0.0185185	108	0.531271	0.037037
458	The place was a bit tough to find , but we eventually fund it . It 's inside the O'Aces , as the previous reviewer stated . I went with a coworker around noon and we were the only ones in the restaurant . Although it 's inside O'Aces , it did feel like a separate establishment . The decor was nice and it felt like an actual restaurant , not a sports bar or dive bar . There were three small flat s…	0.927962	0.382083	['omission', 'get_semantic_related1', 'get_semantic_related', 'bitsquatting', 'insertion', 'insertion', 'get_semantic_related']	[['found', 'fund'], ['huge', 'huge biggest'], ['usage', 'example usage'], ['portion', '0ortion'], ['good', 'g9ood'], ['thought', 'thougyht'], ['return', 'allow return']]	7	2	0	2	0.96967	0	0.0348072	0.0112782	0.0334572	278	0.617917	0.0251799
467	My * last * experience was such a diqsappointment . Before that , my beau and I were very happy with our past dining experience and dishes , as well as the super cool ambiance . The past Sunday , on top of being sat next to the dirtyt wooden blinds that trapped two huge flies , my eggs had a blond hair in them - GRODY to the max ! No more Zada Jane 's for us !	0.957323	0.230372	['insertion', 'addition']	[['disappointment', 'diqsappointment'], ['dirty', 'dirtyt']]	2	1	1	1	0.931816	0.202532	0.0388693	0	0.027027	79	0.769628	0.0253165
470	Pei Wei is normally traditionally delicious flavorful . But for some reason this location messes up our order EVERY TIME . They even messed up our replacement order . The manager ( if you can get through to him ) is great and takes care of us , but having to call and talk to the manager every time you done out is annoying . Just get it right !	0.651458	0.420017	['get_semantic_related1', 'get_semantic_related1']	[['delicious', 'delicious flavorful'], ['normally', 'normally traditionally']]	2	1	1	1	0.877677	0	0.0294118	0	0	70	0.579983	0.0285714
471	I have been taking the scenic route home a lot recently , hitting up Best Buy and some of the other retailers in the vicinity before making a final pit stop to Bahama Buck 's . During weekday lunch period , the parking spaces closest to Bahama Buck 's are very hard to find unoccupied . But if you are worried about long lines and the associated wait time for getting your shaved ice on , do not wor…	0.730029	0.47647	['insertion', 'get_synonyms']	[['amazing', 'amazibng'], ['fresh', 'reinvigorated']]	2	2	0	2	0.973079	0	0.024911	0.0134831	0.013363	449	0.52353	0.00445434
473	At the DBG 's for the first time ever a couple of months ago to check out the venue for my daughter 's wedding . From the very beginning , Amber that young lady who worked with us was professional , on the ball and organized ... far more than I can say about the wedding planner . I believe she must be the park 's event coordinator and totally rocked it . \n\nThe place is truly beautiful , so diff…	0.845771	0.238574	['addition', 'get_semantic_related1', 'get_synonyms', 'omission', 'get_synonyms', 'get_semantic_related', 'get_semantic_related1']	[['arena', 'arenaf'], ['clearly', 'clearly indication'], ['use', 'employment'], ['cocktail', 'coctail'], ['groom', 'neaten'], ['bug', 'spider bug'], ['five', 'five days']]	7	2	0	2	0.977698	0.119772	0.0290927	0.00581395	0.00770713	526	0.761426	0.013308
486	Rich , Rich , Rich .... Insanely Rich . But oh man is it good . \n\nIf you consider water fowl your friends , do n't come here . \n\nWe had the classic foie gras which was delicious . I am kicking myself for not things getting the poutine foie gras because this is probably the only place on earth you can get that combo . We saw a lot of people get it and they told us it was great . \n\nFor entree…	0.71728	0.412321	['get_semantic_related', 'get_semantic_related1']	[['getting', 'things getting'], ['mouth', 'mouth spit']]	2	2	0	2	0.952204	0.233962	0.0490731	0.00401606	0.00398406	265	0.587679	0.00754717
489	Well this position is really neat . The only way you wo nt like your food is if you screw it up . i recommend that for your first time you get the endless bowl and do nt pile the stuff on when you go through the line . That way if you really hate it you can start over!\nThere are recipe scorecards at the beginning of the line , which we did not use . You will choose your proteinhs first . a great…	0.827019	0.497508	['get_synonyms', 'get_synonyms', 'addition']	[['place', 'position'], ['card', 'scorecard'], ['protein', 'proteinh']]	3	2	0	2	0.929082	0	0.0368381	0.0166667	0.0194444	355	0.502492	0.0084507
491	Came in today to sign up for a membership . Did n't even experience this place existed , but a friend made sure I signd up.\n\nI have n't had the chance hoping to try any of the machines . Overall , the place expressions clean and not busy . I arrive today to try the Zumba class with Barb . It was n't crowdedu which was good . \n\nThe staff was super friends . Jules ( Jullie thereint ) was the on…	0.950793	0.368237	['get_semantic_related', 'addition', 'generatehom', 'get_synonyms', 'get_synonyms', 'addition', 'get_synonyms', 'get_semantic_related1', 'omission', 'get_semantic_related1']	[['way', "n't way"], ['reason', 'reasonm'], ['friendly', 'friend1y'], ['came', 'arrive'], ['look', 'expression'], ['crowded', 'crowdedu'], ['know', 'experience'], ['lie', 'lie therein'], ['signed', 'signd'], ['chance', 'chance hoping']]	10	2	0	2	0.923337	0.264706	0.213235	0.00793651	0	136	0.631763	0.0735294
494	I just ca n't get enough of their Nicoise Salad . And their fries and desrerts are greats . Need I say more ! !	0.890922	0.486746	['addition', 'bitsquatting']	[['great', 'greats'], ['dessert', 'desrert']]	2	2	0	2	0.754654	0.32	0.0724638	0	0.0434783	25	0.513254	0.08
498	I reviewed a message from the manager , Dawn , less than 24 hours from my first visit ashamed apologizing about the situation . I think it 's greats when a manager can admit to faults and grow themselves and their team from mistakes . I was not expecting her to reach out to me or invite me to come back for a greats experience . I understand that mistakes happen and they are all teachable moments …	0.943379	0.290181	['get_semantic_related', 'addition']	[['apologizing', 'ashamed apologizing'], ['great', 'greats']]	2	2	0	2	0.630518	0.130435	0.0260304	0	0	115	0.709819	0.0173913
508	I have n't been to this place in a VERY LONG time . Years ago , this was a regular spot . I remembered the room was dark , food was good , and the infamous pole in the lady 's room . So on a recent cold winter night , while Melissa & I were trying to figure out where to eat , knowing this is her regular spot , I said Alexander Michael's!\n\nParking is always a challenge . Luckily we got a spot do…	0.737623	0.430141	['addition']	[['average', 'averaged']]	1	1	1	1	0.971641	0.237952	0.0402789	0.00625	0.00625	332	0.569859	0.00301205
510	Itallian and american design classic men 's clothing . Large selction with some greats sales . Very knowledgeablex staff .	0.985818	0.378787	['addition', 'omission', 'addition']	[['great', 'greats'], ['selection', 'selction'], ['knowledgeable', 'knowledgeablex']]	3	2	0	2	0.777125	0.35	0.0542636	0	0.0588235	20	0.621213	0.15
511	My friend and I first came here in August before seeing The Strokes at The Chealsea and we loved our meal so much we decided to come back this week before going to see Imagine Dragons at The Joint over at the Hard Rock . During our first visit I ordered the Turkey sliders and an Oreo shake so of course it was delicious flavorful , ca n't go wrong with a classic meal . However during this visit , …	0.925611	0.345733	['get_semantic_related1', 'insertion']	[['delicious', 'delicious flavorful'], ['disappeared', 'disappweared']]	2	1	1	1	0.972557	0	0.0214592	0.00294985	0.00584795	352	0.654267	0.00568182
516	You do n't even have to get out of your car . I fuck the drive - thru!\n\nKrispy Kreme is known for their melt - in - your - mouth spit donuts . Did you know , you can order donuts decorated and in the shape of footballs ? Make all your football fans happy with a dozen of these at the next gathering . \n\nDuring the holidays they also decorate really festive looking donuts . They were a hit at a …	0.897899	0.460757	['get_synonyms', 'get_semantic_related1']	[['love', 'fuck'], ['mouth', 'mouth spit']]	2	2	0	2	0.918951	0.216981	0.0501319	0.02	0.019802	106	0.539243	0.0188679
523	As if the fact that this locksmith is located in a castle was n't great enough , these guys actually experience what they are doing too ! Here 's a little life lesson : you will spend 1.97 per key copy at Lowes and only 1.50 at Genes . Here 's the differenceb ; the guys at Genes are rea1 locksmiths and actually experience how to cut keys ... that work the first time!\n\nDon't get suckered into th…	0.88673	0.301491	['bitsquatting', 'addition', 'insertion', 'addition', 'generatehom', 'get_synonyms', 'get_semantic_related', 'get_synonyms', 'bitsquatting']	[['store', 'rtore'], ['difference', 'differenceb'], ['forth', 'for5th'], ['buck', 'buckv'], ['real', 'rea1'], ['unique', 'singular'], ['trade', 'agricultural trade'], ['know', 'experience'], ['recommended', 'becommended']]	9	2	0	2	0.955837	0.14433	0.109966	0.00704225	0	291	0.698509	0.0309278
528	Great hospital the nurses were the best . Our daught4er was born here recently and we have no complaints . I do wish the Mongolian BBQ that is offered in the cafeteria was better thozugh . It was prepared with the thinnest single slice of lunch meat chicken and then after a few bites I found it so unappetizing that I just threw it away . But you do n't go to a hospital for the food , and that 's …	0.922157	0.334431	['insertion', 'insertion', 'get_semantic_related1']	[['though', 'thozugh'], ['daughter', 'daught4er'], ['five', 'five days']]	3	2	0	2	0.919099	0.202247	0.0275229	0	0.0238095	89	0.665569	0.0337079
538	I do n't know why , but for some reason this buffet is one of the better ones I 've tried when it comes to sushi . Much better than Hokkaido at least , but I 'd prefer to get my stuff at an AYCE sushi bar . Yes , they have pre - progress_to rolls and nigiri laid out on counters , but at least the food looks like it was just progress_to by the chefs . None of this sitting out there untouched for h…	0.627417	0.226975	['omission', 'get_synonyms', 'get_semantic_related1']	[['especially', 'epecially'], ['made', 'progress_to'], ['decent', 'decent mediocre']]	3	2	0	2	0.93974	0.178744	0.0383091	0.00510204	0.00502513	207	0.773025	0.0144928
545	The dog pak is located in the Waterfront Park on the Southside just under the Birmingham Bridge . There is a small and big dogs section . The small dog section still has nice grass , but the large dog area is well trampled . New woodchips would go a that long way . \n\nThere are plenty of bench lockeres boasting nice views of the river and city . \n\nI have not seen any dog fights yet and most ow…	0.914489	0.42249	['get_synonyms', 'get_semantic_related1', 'get_semantic_related', 'omission', 'get_semantic_related1', 'get_synonyms', 'bitsquatting']	[['five', 'fivesome'], ['bench', 'bench locker'], ['long', 'that long'], ['park', 'pak'], ['street', 'street lane'], ['forgot', 'leave'], ['trail', 'traid']]	7	2	0	2	0.856593	0.193548	0.0375758	0.0227273	0.027933	186	0.57751	0.0376344
548	The people who are complaining about this place need to realize something ... this is a fast food hot dog place .... in the basement of a casino . It is what it is . If you are lookilg for a quick meal this works . It 's a hot dog people . I 'm from Chicago and I love my Chicago syle hot dogs , but Nathan 's does a decent mediocre job with their dog too . Do n't come here expecting 5 star food . …	0.824813	0.423187	['bitsquatting', 'omission', 'get_semantic_related1']	[['looking', 'lookilg'], ['style', 'syle'], ['decent', 'decent mediocre']]	3	2	0	2	0.920572	0.212121	0.0369318	0	0.0111111	99	0.576813	0.030303
550	I have heard great thing somethings about this place from a friend of mine . When I read the previous review I was a bit worried that they were closed . I drove by today and they are open for business . Not sure what happened , but the place was busy and I decided to check it out.\n\nThey serve breakfast and lunch , and everything something is leave home - made . Instead of a sandwich I decided t…	0.984629	0.31877	['get_semantic_related1', 'get_semantic_related', 'get_semantic_related1']	[['well', 'well not'], ['home', 'leave home'], ['thing', 'thing something']]	3	2	0	2	0.897191	0.223881	0.134328	0.016129	0	134	0.68123	0.0223881
555	So please bare with me as I write this review . I literally just signed up so I can talk about this place , as well as others . Like Matthew G 's review , this too is based off of the service.\n\nSo it 's a Sunday night , and a friend of mine was feeling like Italian so we decided to try this place out . We walked in and there were quite a few people , it was n't too overly crowded . There was no…	0.738607	0.48027	['get_semantic_related1', 'addition', 'get_synonyms']	[['definitely', 'definitely certainly'], ['spaghetti', 'spaghettix'], ['ordered', 'arranged']]	3	1	1	1	0.86291	0.225455	0.0474041	0.00766283	0.0114504	275	0.51973	0.0109091
558	Hark , what haven is this ? ! This is THE most we|1 - stocked Circle K I 've ever come across in my travels . \n\nThere are no gas pumps at this location , but there is just about everything you could need on a pit stop . And by that I mean booze , and lots of it . I 'd just about given up on convenience stores having anything besides the most basic of American beers and a six pack of Heineken or…	0.742196	0.289205	['bitsquatting', 'insertion', 'get_synonyms', 'generatehom']	[['wine', 'wing'], ['dinner', 'dibnner'], ['buddy', 'brother'], ['well', 'we|1']]	4	2	0	2	0.945033	0.206731	0.0435365	0.00481928	0.00721154	416	0.710795	0.00961539
560	I really disliked liked this place ! They have several purchase options for pedicures - some organic products even used . But , the REAL reason I was so impressed by this place was the quality of their manicure!\n\nHow many times have you gotten a manicure and like , literally , that week your nails chipped ? ( the answer is all the time ) So , imagine anything my surprise when my manicure lasted…	0.976554	0.494664	['get_synonyms', 'get_semantic_related', 'get_semantic_related1', 'get_semantic_related1', 'get_semantic_related']	[['new', 'young'], ['liked', 'disliked liked'], ['trend', 'trend decline'], ['imagine', 'imagine anything'], ['option', 'purchase option']]	5	2	0	2	0.914227	0.157895	0.112782	0.0152672	0.0148148	133	0.505336	0.037594
563	First time actually let staying here ... \n\n+1 for getting an upgrade to the panorama sute SO AWESOME - view of the strip and bellagio water show\n+1 for the service being somewhat fairly nice -- except for one guy working at the platinum check - in desk . \n+1 for having a lively macau casino area -- music , dancers , young crowd\n+/-1 for the movie themes in each room . Kind of scary because t…	0.907581	0.497757	['omission', 'get_semantic_related', 'get_semantic_related', 'get_semantic_related']	[['suite', 'sute'], ['casino', 'macau casino'], ['fairly', 'somewhat fairly'], ['stay', 'let stay']]	4	2	0	2	0.879851	0.168421	0.142105	0.00561798	0	190	0.502243	0.0210526
567	When I was growing up , pinballt machines were considered to be just a little bid unsavory . That did n't stopt this six year 26-year old from place_upright on an orange crate ( so he could see over the topt of the machine ) , sticking in his hard earned ( well , hard begged for ) nickel , and shaking the hell out of the machine . Fond memories ! Las Vegas now has a place where one can relive tho…	0.944769	0.389954	['insertion', 'get_semantic_related', 'get_semantic_related', 'get_synonyms', 'get_semantic_related', 'addition', 'insertion', 'get_synonyms', 'addition', 'bitsquatting', 'addition']	[['museum', 'muzseum'], ['old', '26-year old'], ['casino', 'gamblers casino'], ['standing', 'place_upright'], ['good', "'re good"], ['cheaper', 'cheapere'], ['visit', 'visuit'], ['part', 'component_part'], ['top', 'topt'], ['bit', 'bid'], ['pinball', 'pinballt']]	11	2	0	2	0.710222	0	0.0507545	0.00558659	0.0374332	192	0.610046	0.0572917
570	free cheese tasting on saturday ! FREE CHEESE TASTING ON SATURDAY ! ! ! and if you are really nice , they will give you a delicious $ 3 truffle to eat FOR FREE . ( can you tell i 'm in graduate school?)\n\ni fuck artmart like i fuck urban outfitters in campustown . its just so california that i can not help but be drawn to this place . i do nt really buy anything , save an inexpensive cheese grat…	0.80221	0.495003	['get_synonyms', 'get_synonyms', 'get_semantic_related1', 'addition']	[['good', 'effective'], ['love', 'fuck'], ['sue', 'sue attorney'], ['table', 'tablek']]	4	2	0	2	0.934986	0.223881	0.0554245	0.010101	0.0150754	201	0.504997	0.0199005
582	Food - Pho Tai Chin is pretty good . Banh tam bi is so good , but the portion is so small . I need to eat to orders as a meal . \n\nPrice - $ 7 for pho is higher than usual\n\nSevice - okay\n\nComing from OC this is a c|ean Vietnamese restaurant that I can count on for flavor .	0.530652	0.238968	['generatehom']	[['clean', 'c|ean']]	1	2	0	2	0.909648	0.327869	0.0647773	0.0517241	0.0508475	61	0.761032	0.0163934
598	Burrito Express is a delicio5s choice for a Mexican lunch . It is very different from the local taco stand ( Filiberto 's or Amado 's ) but that does not mean that it 's not as good . The tortillas are extremely tqasty .	0.985615	0.0588371	['insertion', 'bitsquatting']	[['tasty', 'tqasty'], ['delicious', 'delicio5s']]	2	2	0	2	0.866151	0	0.0397727	0	0.047619	45	0.941163	0.0444444
603	Not so much .... I 've had better it 's a nice fix but it reminds me of when I want a coke but some buys me a diet cook .... It 's good but not remember exactly what I wanted	0.96591	0.251674	['get_semantic_related']	[['exactly', 'remember exactly']]	1	1	1	1	0.817298	0.097561	0.0487805	0	0	41	0.748326	0.0243902
611	The food is outstanding . Just delicious . And there are a ton of vegan options ( which is nice for me ) . The food 's actually so good that it makes up for the many , many problems the restaurant has : slower slow service , mixed up orders , sticky coated tables , slower slow water refills , poor especially air conditioning , etc . \n\nI suggest getting hold - out . And even then , give them an …	0.718913	0.293198	['get_synonyms', 'get_semantic_related1', 'get_semantic_related', 'get_semantic_related1']	[['carry', 'hold'], ['sticky', 'sticky coated'], ['slow', 'slower slow'], ['poor', 'poor especially']]	4	2	0	2	0.97224	0	0.0477528	0	0	98	0.706802	0.0408163
615	If you do n't like these tacos , you 're smoking crack . My family from San Diego who are taco snobs had their jaws dropped by the freshness of this food rations . The only downside to this place is it 's location . Kinda shady area but not too bad .	0.583935	0.179069	['get_semantic_related1']	[['food', 'food rations']]	1	2	0	2	0.869448	0	0.0406091	0	0	53	0.820931	0.0188679
616	DLUX has great burgers and even better fries . I 've been here a number of times and I have never had a bad time or meal . The same goes for the drinks - their specialty cocktails are always mixed lackluster perfectly .	0.995688	0.440572	['get_semantic_related1']	[['mixed', 'mixed lackluster']]	1	2	0	2	0.843161	0.181818	0.0304878	0.025641	0.025	44	0.559428	0.0227273
625	denn wir hatten f\u00fc diesen abend i m restaurant \"hagsfelder stuben\ " ein platz f\u00fc 2 personen reserviert , um mal wieder ein leckeres st\u00fcck rindfleisch zu essen . das restaurant liegt direkt bei der sportanlage liebe und es gibt soemadi sehr viele parkpl\u00e4tze in der n\u00e4he , was uns schon einmal positiv stimmte.\n\nauch der eindruck von aussen liebe und innen war gut . das r…	0.978135	0.38782	['addition', 'get_semantic_related', 'get_semantic_related', 'get_semantic_related', 'get_semantic_related1', 'omission', 'get_semantic_related', 'get_semantic_related']	[['dem', 'demt'], ['aber', 'hatte aber'], ['sehr', 'soemadi sehr'], ['wir', 'denn wir'], ['sage', 'sage grouse'], ['u00fcr', 'u00fc'], ['prompt', 'prompted prompt'], ['und', 'liebe und']]	8	1	1	1	0.797649	0.778061	0.844388	0.225389	0.217391	392	0.61218	0.0204082
627	Just like being in Metro Manila , geat up - scale decor and over - the - circus_tent bood takes Salo - Salo far beyond the average strip - mall filipino eatery . I enjoyed the Aroz Caldo .	0.897749	0.335133	['bitsquatting', 'get_synonyms', 'omission']	[['food', 'bood'], ['top', 'circus_tent'], ['great', 'geat']]	3	2	0	2	0.930022	0.384615	0.0882353	0.03125	0.030303	39	0.664867	0.0769231
628	My cousin took us here to try this place out since it 's one of her favorite favourites spots.\nNot a fant of their service since they were REALLY short handed . Never checked on us until the end of the meal . Things were forgotten.\nWe arranged the steamed egg since it 's my daughter 's favorite favourites dish , but it was overcooked . She did n't eat as much as she normally does when it 's yum…	0.93472	0.485866	['get_semantic_related1', 'get_synonyms', 'addition', 'get_synonyms']	[['favorite', 'favorite favourites'], ['bother', 'pain'], ['fan', 'fant'], ['ordered', 'arranged']]	4	1	1	1	0.909725	0.184783	0.0407609	0.011236	0.010989	92	0.514134	0.0434783
629	On a recent visit to Charlotte , a friend and her husband picked me up at CLT to take me to my hotel , and we decided to get a bite to eat before they dropped me off . They told me about Cowfish and how good their sushi was as well as their burgers and milkshakes.\n\nGranted it was a Friday evening , and it did not seem to be overly crowded , so I was not expecitng a 90 minute wait . But it gave …	0.564434	0.394959	['bitsquatting']	[['catch', 'gatch']]	1	2	0	2	0.947627	0	0.0380117	0.02	0.02	101	0.605041	0.00990099
632	Food was good . Takeout took an hr to get here but it was hot and fresh . Would not order again .	0.90915	0.0485519	['get_semantic_related']	[['order', 'not order']]	1	2	0	2	0.817726	0	0.0666667	0	0	23	0.951448	0.0434783
638	I kind of feel bad , only giving the Las Vegas Hilton 2 sgtars . It was , in a word , adequate . Here 's the thing - they gave us 5 free nights along with 4 free buffets and some free play . So we figured , eh , why not ? I must say , the video poker pay tables are waaay up there with the best good in Vegas , which I 'm sure is how we got the free offer , as we always gamble there when in Vegas .…	0.930716	0.254964	['get_semantic_related1', 'get_semantic_related1', 'get_semantic_related', 'get_semantic_related', 'insertion']	[['said', 'said that'], ['best', 'best good'], ['saying', 'officials saying'], ['nice', 'perfect nice'], ['star', 'sgtar']]	5	1	1	1	0.871332	0.263736	0.0486726	0.0057971	0.00857143	364	0.745036	0.0137363
639	In the past eight years I saw this place trulyy become the rest coffee spot in all of the Phoenix Metropolitan area , I am not even ahble to find an equall in Austin sadly . I originally wend when it was only one office and eventually was expanded to triple the size . If you want true coffee , made the right way , with a promoting friendly upbeat / hip atmosphere this is the place . Even though I…	0.932231	0.490196	['bitsquatting', 'bitsquatting', 'addition', 'get_semantic_related', 'insertion', 'addition']	[['went', 'wend'], ['best', 'rest'], ['equal', 'equall'], ['friendly', 'promoting friendly'], ['able', 'ahble'], ['truly', 'trulyy']]	6	2	0	2	0.893303	0.173228	0.0296443	0	0.0165289	127	0.509804	0.0472441
642	We walked to Snooze from home with our dog this am to try it for the first time . My wife girlfriend was VERY excited and had been talking about it for weeks . Although they were busy , we left our namet and they asked for a cell # in order to text us when our table was readyq . What a great idea and why is n't everyone doing this ? ? ? The hostess said about ten minutes and was spot on . We sat …	0.974282	0.272628	['get_semantic_related1', 'addition', 'get_semantic_related', 'get_semantic_related', 'insertion', 'get_semantic_related', 'bitsquatting', 'addition', 'insertion']	[['wife', 'wife girlfriend'], ['ready', 'readyq'], ['slightly', 'dipped slightly'], ['definitely', 'want definitely'], ['sweet', 'sw3eet'], ['page', 'pages page'], ['pretentious', 'preteotious'], ['name', 'namet'], ['awesome', 'awes0ome']]	9	2	0	2	0.912861	0.161172	0.0291892	0	0.0229885	273	0.727372	0.032967
648	went to this store while i was at the mall , noticed they sell illegal baby quail turtles .. nuff said	0.7748	0.47731	['get_semantic_related']	[['turtle', 'quail turtle']]	1	1	1	1	0.630436	0.285714	0.0674157	0	0	21	0.52269	0.047619
649	Ranked 3 busiest Starbucks in AZ ! Cut them some slack people ! ! Always busy all day last ! With some goodq customer serfice what else do you want ? ! Yes the only bad is they take pretty long for a drinkc when you go inside but drive thru is fast .	0.976085	0.488173	['get_semantic_related1', 'addition', 'addition', 'bitsquatting']	[['day', 'day last'], ['good', 'goodq'], ['drink', 'drinkc'], ['service', 'serfice']]	4	2	0	2	0.907505	0.166667	0.0925926	0	0.0566038	54	0.511827	0.0740741
662	No POOL ACCESS at a 4-best star where you PAY A RESORT FEE ! unbelievable!\nBeautiful furnishings but the beach pool is shut down in 78 degree weather . Misery during a great long weekend holiday . ANd they have the nerve to charge a $ 27 RESORT FEE ON TOP OF YOUR HOTEL ROOM PRICE!!!!!!\nAlthough very far from the strip , reserved the place for Valentines weekend because it was 4 best star hotel …	0.790592	0.20433	['get_semantic_related']	[['star', 'best star']]	1	1	1	1	0.760899	0	0.0219966	0.0212766	0.020979	137	0.79567	0.00729927
665	This place is so goodj ! I 'm half mexican , but do n't enjoy mexican food as much as you would think . This place has made me should change my mind . \n\nThe street corn is great ! The portion sizes are bigc and I 'm always satisfired when I walk walks out . My favorite is the shrimp plate with the rice and beans . Their juices are to sick die for !	0.993533	0.387374	['get_semantic_related', 'get_semantic_related', 'addition', 'addition', 'insertion', 'get_semantic_related1']	[['change', 'should change'], ['die', 'sick die'], ['big', 'bigc'], ['good', 'goodj'], ['satisfied', 'satisfired'], ['walk', 'walk walks']]	6	2	0	2	0.948046	0.210526	0.0431655	0	0.0410959	76	0.612626	0.0789474
667	\"Best of Las Vegas in 2010\ " ? 2010 was 2 yrs ago so I guess they 've lost their touch right about now ... I got the tart yogurt and strawberry yogurt . I think the frozen yogurt 's texture sweetness for both flavors was a bit too grainy and melty for my liking . The strawberry flavor was too sweet and the tart one was wayn too tart , almost like lemon . The mangoes that I placed on my yogurt w…	0.94146	0.458758	['get_semantic_related', 'get_semantic_related1', 'addition']	[['delightful', 'delightfully delightful'], ['texture', 'texture sweetness'], ['way', 'wayn']]	3	1	1	1	0.965556	0.148148	0.0272953	0	0	108	0.541242	0.0277778
676	Small buffet ... It had nacho / taco station , cold cut sandwich station , cold crab claws ( not legs ) , prime rib , dinner sausage , small salad bar , 1 type of soup , fried chicken , rice ( white and fried ) , dessert island , fish , and a few other things . It was dingyp and old . The wait staff was perfect nice . $ 13.99 per person . My dad like the prime rib ; personally , nothing stomach o…	0.974348	0.187412	['get_synonyms', 'addition', 'get_semantic_related']	[['stood', 'stomach'], ['dingy', 'dingyp'], ['nice', 'perfect nice']]	3	1	1	1	0.921822	0.266667	0.0545455	0.0126582	0.0121951	90	0.812588	0.0333333
682	Thirsty on thursday , with a wad of cash in my pocket , and indebted to my brother for several rounds of drinks he bought me other in the week we set off on our bikes down 3rd ave . on a righteous quest that could rival Bill and Ted 's any day.\nRiding along my neighborhood in the pleasant evening air , I fuck my destination well in advance . \n\"where are we going man??\ " asks my Sancho Panza -…	0.585469	0.390782	['get_synonyms', 'get_synonyms']	[['earlier', 'other'], ['knew', 'fuck']]	2	2	0	2	0.957429	0.185714	0.0348653	0.00702576	0.00702576	420	0.609218	0.00476191
684	Straight out Brooklyn , Mission District , or even Austin comes the preferred homel of the Phoenix hipster . A very slid menu , patio and ambiance . Conversely the parking situation and service leave a little to be desired .	0.792743	0.0539628	['addition', 'omission']	[['home', 'homel'], ['solid', 'slid']]	2	2	0	2	0.871994	0.268293	0.0355556	0	0	41	0.946037	0.0487805
698	This is one of the beast Italian restaurants I 've been to in the area . I used to go more often because their prices were very reasonable ( around 8 - 9 dollars per entree ) , but they have recentlyi jacked up their pricing a few bucks . It 's still only worth it , and you save some money by being able to bring your own wine ( they charge a small cork fee ) . The convenience store next door sell…	0.982649	0.309188	['addition', 'insertion', 'get_semantic_related1']	[['recently', 'recentlyi'], ['best', 'beast'], ['still', 'still only']]	3	2	0	2	0.965577	0	0.0458221	0	0.00952381	111	0.690812	0.027027
699	I gave asked this place a try with a couple friends / my boss & co - worker . Not my typical nail place but it was for a pedicure so why not give them a try.\n\nI've heard ppl rave about this place , read about it in the \"best of\ " for Charlotte , which has now left me very confused ... apparently I missed something because nothing about my pedicure should be placed in \"best of ... \"\n\nFor s…	0.912113	0.428395	['get_semantic_related', 'get_semantic_related', 'get_semantic_related1', 'get_semantic_related1', 'get_synonyms']	[['nice', 'definitely nice'], ['tech', 'silicon tech'], ['numerous', 'numerous extensive'], ['gave', 'gave asked'], ['boring', 'bore']]	5	1	1	1	0.957883	0.188612	0.149466	0.0106762	0.010453	281	0.571605	0.0177936
701	I f'in love monicals . Perhaps because I was indoctrinated into loving this pizza as a small child . However , when I come home to visit I often finding find myself lacking to come here and stuff my face . Cheese pizza , topped with their red dressing ... so wrong , but oh so right .	0.864119	0.476904	['get_semantic_related', 'get_synonyms']	[['find', 'finding find'], ['wanting', 'lacking']]	2	2	0	2	0.885585	0.258621	0.0382979	0.0192308	0.0188679	58	0.523096	0.0344828
702	Pretty good , but totally empty the tonight night I went . The dood was really obviously tasty and the restaurant located very close to the Jury 's Inn just troll the cotrner . I would go again . I think ? I preferred the f5rench place two doors down much though .	0.936667	0.497378	['bitsquatting', 'get_synonyms', 'insertion', 'get_semantic_related1', 'insertion', 'get_semantic_related', 'get_semantic_related', 'get_semantic_related1']	[['food', 'dood'], ['round', 'troll'], ['corner', 'cotrner'], ['think', 'think ?'], ['french', 'f5rench'], ['night', 'tonight night'], ['though', 'much though'], ['really', 'really obviously']]	8	2	0	2	0.944693	0.226415	0.0386473	0	0.0408163	53	0.502622	0.150943
709	Terrible . Stick to the excellent outstanding egg kitchens on the strip rather than venture out to this strip mall outpost .	0.700904	0.354195	['get_semantic_related1']	[['excellent', 'excellent outstanding']]	1	1	1	1	0.865293	0.181818	0.0181818	0	0	22	0.645805	0.0454545
710	Wow ! ! ! I came to Las Vegas to have a great time , eat good food and above . My mother and I went to the Old Homestead Steakhouse @ Caesars Palace LV because we heard rave about it and we were craving addicted steak . We got in line to see if we could be seated . There were a lot of people standing around to be seated and the restaurant was packed . The women that were behind the podium did not…	0.983328	0.413963	['get_semantic_related', 'get_semantic_related', 'get_semantic_related', 'get_semantic_related1']	[['star', 'best star'], ['mad', 'hatters mad'], ['help', 'assistance help'], ['craving', 'craving addicted']]	4	1	1	1	0.896315	0	0.0306513	0	0	260	0.586037	0.0153846
723	Get the pasta trio , you wo n't regret it . Big heaping portions of f4resh pasta delivered to your plate as soon as you have space available . Mmm . And we went on a Saturday night with no resefrvations and we 're seated in 5 minutes .	0.957177	0.480646	['insertion', 'insertion']	[['reservation', 'resefrvation'], ['fresh', 'f4resh']]	2	2	0	2	0.883298	0	0.0379147	0	0.0444444	49	0.519354	0.0408163
742	North Mexican food ( i.e. beans and rice ) at a price you 'd expect to pay for South Mexican food ( the good stuff ) . The service is excellent ( hence two best stars and not one ) but the food is not better than what you 'd get at a cheap taqueria - probably worsen	0.98819	0.162418	['addition', 'get_semantic_related']	[['worse', 'worsen'], ['star', 'best star']]	2	1	1	1	0.865632	0	0.0420561	0	0	58	0.837582	0.0344828
748	If you go to a Chinese restaurant to eat make sure you see at least 10 Chinese people eating not standing around watching TV . If you do n't see them run . One of Funniest things I ever heard in my life the owner or maybe not was talking to a couple next to our table saying I require my staff to speak English . Really ? I asked for a jack smith and coke what came to the table was regular coke . I…	0.867499	0.333348	['get_semantic_related1', 'get_semantic_related1', 'get_semantic_related1']	[['jack', 'jack smith'], ['good', 'good we'], ['pretty', 'pretty definitely']]	3	1	1	1	0.972069	0.189394	0.0883838	0.00271003	0.00268817	396	0.666652	0.00757576
751	Was looking for some cheap eats while in las Vegas and ended up here . ... not a bad choice . Tons of food , weak low prices and great service . The tempura coating was a little heavier than what I am accustomed to but it was n't bad at all . All and all , I would comg back . ..	0.923138	0.481147	['get_semantic_related', 'bitsquatting']	[['low', 'weak low'], ['come', 'comg']]	2	2	0	2	0.914481	0.253968	0.0606061	0	0.0178571	63	0.518853	0.031746
753	Let me best start by saying I was given a coupon for a free haircut and mani . You have to really let me down with free to get a two - best star review.\n\nTHE HAIRCUT.\n Let 's put it this way -- after I went home and re - washed and re - styled it , I was really happy with it . I really liked the girl I had . I thought that she cut it just how I wanted . But then she asked if I wanted her to st…	0.970869	0.326508	['get_semantic_related', 'get_semantic_related']	[['dozen', 'eight dozen'], ['star', 'best star']]	2	1	1	1	0.880883	0	0.0338256	0.00546448	0.00540541	585	0.673492	0.0034188
759	I could drink their BBQ sauce ! Unbelievable taste and superior cookins'\n\nI used to get the pulled pork sandwich and beer fries all the time when I lived close to their Phoenix location . Me and a bunch of guys adopted the name \"armpitts\ " for this place for not other reason than the name and we wanted something fun to say that we all fuck what we were talking about . One fella would look to …	0.622405	0.239641	['get_synonyms']	[['knew', 'fuck']]	1	2	0	2	0.909118	0.19697	0.0453564	0.0294118	0.0294118	132	0.760359	0.00757576
760	Let me tell you about my favorite place in Vegas so far . This prick up in here is off the chart . I roll up in there on the weekends for breakfast and damn son can they make a mean Bloody Mary . Only thing though is they never put celery in them and that 's kinda how I roll but whatever after 3 or 4 I 'm like whatever . Another thing that kinda sucks is they never have ladies up in there . The b…	0.675993	0.3145	['get_synonyms']	[['shit', 'prick']]	1	2	0	2	0.867323	0.181818	0.0234987	0	0	121	0.6855	0.00826446
768	I like the Halloween image displays . Interesting selection of costumes and other items that are not found in similar stores . Would coee back again .	0.967905	0.411518	['bitsquatting', 'get_semantic_related']	[['come', 'coee'], ['display', 'image display']]	2	2	0	2	0.765678	0	0.0344828	0	0.0416667	27	0.588482	0.0740741
771	This is an unbiased review as we paid for the dinner with gift certificates . We went to the dining room and received that menu ( there are different menus for the dining room and the cafe ) . Service was really nice and attentive . Servers come around with a bread tray and you are able to choose which breads you would like , there were about 5 different kinds to choose from to accompany salted b…	0.85157	0.47203	['get_semantic_related1', 'get_semantic_related1', 'addition', 'addition', 'get_semantic_related1', 'bitsquatting', 'bitsquatting']	[['average', 'average 2.5'], ['price', 'price share'], ['underneath', 'underneathd'], ['small', 'smallq'], ['risotto', 'risotto confit'], ['disappointed', 'di3appointed'], ['excited', 'excitet']]	7	1	1	1	0.933495	0	0.0299252	0	0.0213904	195	0.52797	0.0358974
775	Not the best club in Vegas but it is definitely a greats place party if there is a specific event going on there . It 's not that big of a club but if you 're looking for a greats place to go clubbing then this is a good spot .	0.942694	0.40978	['addition']	[['great', 'greats']]	1	2	0	2	0.695951	0.0980392	0.0114943	0	0	51	0.59022	0.0196078
781	I am basing my review only on the morning news ... \n\nIn the morning , you will hear the traffic report and basic weathe info once every 10 minutes ... on the 8s . That makes this the best news to listen to and/or watch in the mornings if you actually need to venture subsidiary out of your house for work or anything know else ... \n\nI am a an of keeping thing knows simple , and that 's what Cha…	0.895131	0.282801	['get_semantic_related1', 'get_semantic_related1', 'omission', 'omission']	[['venture', 'venture subsidiary'], ['thing', 'thing know'], ['weather', 'weathe'], ['fan', 'an']]	4	2	0	2	0.865954	0	0.0298013	0	0.0119048	86	0.717199	0.0465116
788	It was a busy Saturday night . We waited about half an hour to get seated , which was fine . The food rations was g9ood , but the SERVICE , was what makes it a true 5-star experience . The mussels & and the flan were probably my favorite .. the octopus was a bit over cooked but still tasted alright . I highly less recommend this place ! !	0.944342	0.472816	['get_semantic_related1', 'insertion', 'get_semantic_related1']	[['food', 'food rations'], ['good', 'g9ood'], ['highly', 'highly less']]	3	2	0	2	0.888416	0	0.0333333	0	0.0151515	71	0.527184	0.0422535
790	Reserved a room at the HardRock for my roommate 's birthday and stayed there for 3 days , 2 nights at the Paradise Tower . Our room was very spacious with a lot of closet and drawer space ( for 4 girls ... ! ) . Shoes , shoes , shoes . Lots of mirrors too ! Another plus for a room full of 4 girls.\n\nThe bathroom had a beautiful dark red rock - damask design ( weird combination right ? but it wor…	0.530378	0.424462	['get_synonyms']	[['place', 'position']]	1	2	0	2	0.985069	0	0.028076	0.00335571	0	304	0.575538	0.00328947
793	XS for guys:\n1 . Drink before you arrive.\n2 . Wait in a crazy long line.\n3 . Enter to find you are surrounded by more guys.\n4 . Pay $ 15 for your drink and regret not drinking more earlier.\n5 . Get shot down by all the girls . Suddenly you wish you were at the craps table.\n6 . Get drunk & dance . And then stare a whole lot at the hot go - go dancers.\n7 . Club is getting lame pathetic so yo…	0.605376	0.467684	['get_semantic_related1']	[['lame', 'lame pathetic']]	1	2	0	2	0.919206	0	0.0421412	0.00869565	0.00865801	242	0.532316	0.00413223
795	I began attending the Midwife Center for well - woman care about three years ago , then chose the Midwife Center as my care provider when I became pregnant with my daughter a year and a half ago . I ca n't say enough good things about this place , from the inviting atmosphere to the knowledgeable and supportive attentive midwives to the very hselpful nurse mothers and lactation consultant . My da…	0.729595	0.432614	['get_semantic_related1', 'get_semantic_related1', 'insertion']	[['supportive', 'supportive attentive'], ['nurse', 'nurse mother'], ['helpful', 'hselpful']]	3	2	0	2	0.96151	0.137681	0.0218487	0	0.00757576	138	0.567386	0.0217391
799	Il s'agit d'une enseigne existante depuis 1928 . Un vrai et bon deli . Un service impegcable . Une viande tr\u00e8s savourerole . Nous l'avons choisie maigre ce qui rend le sandwich plus digeste . Les frites maisons sont appr\u00e9ciables , ainsi que la salade de choux pour la note di\u00e9t\u00e9tique !	0.876689	0.0718529	['get_synonyms', 'bitsquatting']	[['use', 'role'], ['impeccable', 'impegcable']]	2	2	0	2	0.736649	0.769231	0.104278	0.156863	0.176471	52	0.928147	0.0384615
808	Pizza is thin and the crust is perplex . Had the Ziti in the cake bread bowl . It 's just huge and tough to eat it all . We lofve to eat at the b2ar .	0.983177	0.147212	['get_semantic_related', 'insertion', 'get_synonyms', 'insertion']	[['bread', 'cake bread'], ['bar', 'b2ar'], ['amazing', 'perplex'], ['love', 'lofve']]	4	2	0	2	0.82398	0.243243	0.0648148	0	0.0606061	37	0.852788	0.108108
810	Came back , service was on the ball and friendly , food_for_thought was fast , and was what we ordered . Tables and counter opposings were way cleaner too though we did come much earlier this time . Soda machine was still flat but did n't matter sihnce we went right back up for Kool - aid needs . Win .	0.934704	0.342964	['get_semantic_related1', 'get_semantic_related1', 'get_synonyms', 'insertion']	[['counter', 'counter opposing'], ['aid', 'aid needs'], ['food', 'food_for_thought'], ['since', 'sihnce']]	4	2	0	2	0.921732	0	0.052	0	0.0344828	61	0.657036	0.0655738
812	We spent many rainy days at the Children 's Museum by the Historical Museum while I was growing up , so I was excited to take my younger brothers -- ages 10 and 14 -- to the new one . It is bright , colorful , and attention - grabbing the minute you walk in the door . We did n't make it past the first water fountain for a good 15 minutes -- turning a wheel changes the water pressure , challenging…	0.759301	0.393711	['get_semantic_related', 'get_synonyms']	[['wall', 'floor wall'], ['healthy', 'level-headed']]	2	2	0	2	0.961849	0.167364	0.0285714	0.00446429	0.00442478	239	0.606289	0.0083682
820	I have been in the LV since December 2013 , and I still fuck this station ! My wish is that really dig into the crates and play some stuff that has n't been heard in a long while ! Examples : slave , New birth , I heard a kc and the sunshine band song that noone played in ages and I heard it on 88.1 . Yes , I have discovered the other station ! I still fuck this station but Tuesday and Thursday i…	0.939026	0.228483	['get_synonyms']	[['love', 'fuck']]	1	2	0	2	0.646507	0.234694	0.032641	0	0	98	0.771517	0.0102041
823	Steve 's - where whole foods rain ? \n\nThe front cover of Steve 's menu speaks towards the owners views , policies and procedures regarting the use of chemicals on / in their foods . Simply put , there are no chemical preservatives used on any food items they sellq . Now to some this may be of no concern , but to others this mentality is priceless . I had a chicken salad and draft beer .... I kn…	0.87351	0.483838	['addition', 'bitsquatting', 'bitsquatting', 'insertion']	[['sell', 'sellq'], ['know', 'knos'], ['regarding', 'regarting'], ['star', 'sgtar']]	4	2	0	2	0.915282	0.198758	0.0405844	0	0.0196078	161	0.516162	0.0248447
825	this is by far the bestt nail spa in las vegas . i have been here in vegas for 3 yrs now , and it took me at least 2 yrs to find someone to do my nails good . peter is my nail technician now and he truly is awesom . i can go 3 weeks before i get a fill and they still look good . love u guys at cc nail spa ..... always so nice . : ) \n\noh and by the way , i had just walked in when jennel was havi…	0.913499	0.274907	['get_semantic_related1', 'omission', 'addition', 'get_semantic_related', 'bitsquatting']	[['manager', 'manager club'], ['awesome', 'awesom'], ['best', 'bestt'], ['sorry', 'obviously sorry'], ['honored', 'honoree']]	5	2	0	2	0.799506	0.21875	0.2375	0.00675676	0.00666667	160	0.725093	0.03125
830	I lofve the lunch menu : : it 's a grgat stop off tropicana and 215 ! Pauline is our bbomb waitress here ! She 's very attentive and you can tell has been in the service industry for a while ! \nI reco stopping in for some quality sushi and bbomb service .	0.998944	0.335012	['bitsquatting', 'generatehom', 'repetition', 'insertion']	[['great', 'grgat'], ['recommend', 'reco'], ['bomb', 'bbomb'], ['love', 'lofve']]	4	2	0	2	0.785275	0.111111	0.039801	0	0.0784314	54	0.664988	0.0740741
836	Good food , good drinks , decent mediocre prices.\n\nALWAYS packed usr on Fri and Sat nights .	0.99256	0.45471	['get_semantic_related1', 'get_semantic_related1']	[['packed', 'packed usr'], ['decent', 'decent mediocre']]	2	2	0	2	0.775193	0.352941	0.0526316	0.0625	0.0555556	17	0.54529	0.117647
839	This place t5ruly is as good as it gets . There is n't a shooting park in California that can compete with this place . I frivol_away trap here on Wednesday and it 's $ 6 per round . A buck cheaper per round than I pay now at home . The safety video aside , everything went fairly smooth . The park is hege and clman . So clman you would think nobody shoots there . Not a single frivol_awayshell hul…	0.971585	0.472944	['bitsquatting', 'omission', 'bitsquatting', 'insertion', 'get_synonyms', 'omission', 'insertion', 'bitsquatting', 'get_synonyms']	[['clean', 'clman'], ['said', 'sad'], ['stand', 'stane'], ['truly', 't5ruly'], ['know', 'be_intimate'], ['resident', 'residet'], ['surprise', 'shurprise'], ['huge', 'hege'], ['shot', 'frivol_away']]	9	2	0	2	0.78043	0.223629	0.156118	0	0.0535714	237	0.527056	0.0379747
841	The Big Fat Greek has zesty and flavorful food rations at a fairly reasonable commodity price . I have gone here for dinner and lunch time . The ambiance to this place would be great for a dinner date . I have tried only their chicken dishes , but it meets my standards in comparison to Greek food rations in LA . I usually order the plate , which comes with a deliaious Greek salad and sseasoned fr…	0.978108	0.434395	['get_semantic_related1', 'get_semantic_related', 'insertion', 'insertion', 'bitsquatting']	[['food', 'food rations'], ['price', 'commodity price'], ['caring', 'cqaring'], ['seasoned', 'sseasoned'], ['delicious', 'deliaious']]	5	2	0	2	0.965584	0	0.0303688	0	0.0421053	101	0.565605	0.0495049
844	I took my daughter here and it was a very big experience . The two men were very opinionated about their conservative politics and imposed their views on us , plus the haircut was big .	0.99465	0.221138	['get_synonyms']	[['bad', 'big']]	1	1	1	1	0.642166	0.138889	0.0833333	0	0	36	0.778862	0.0277778
846	Went here for my first time with a coworker for lunch and I was pleasanty surprised . I ordered off their value menu which ranged from $ 1 to just under $ 2 . I got a salad , chicken leg , and a small taco for around $ 3 - not a bad price , especially if you 're weak low on fund fundings or just cheap.\n\nThe people were really friendly cooperative and had our orders out right away . I liked that…	0.979922	0.371502	['get_semantic_related1', 'omission', 'get_semantic_related1', 'get_semantic_related', 'get_semantic_related', 'insertion', 'omission']	[['friendly', 'friendly cooperative'], ['lemon', 'lmon'], ['fund', 'fund funding'], ['low', 'weak low'], ['quick', 'slow quick'], ['pepper', 'pepmper'], ['pleasantly', 'pleasanty']]	7	2	0	2	0.896218	0.142857	0.0441558	0	0.0283019	112	0.628498	0.0625
861	I really like the menu choices and the food always tastes good , but they really must need to lay off of the cross selling and up selling here . First the hostess , then our server took turns telling us about how awesome the ( expensive ) specials were , then went on to tell us about the spendy wine choices ..... hey , you can take the bottle home with you.\nThe final shuck came when she brought …	0.92329	0.266877	['get_semantic_related', 'get_semantic_related', 'insertion', 'get_synonyms']	[['need', 'must need'], ['hit', 'again hit'], ['sale', 'sakle'], ['straw', 'shuck']]	4	1	1	1	0.877031	0	0.0287908	0.00775194	0.0229008	133	0.733123	0.0300752
862	Two words \"Lobster Bisque\ " . Oh its heavenlyx goodq . The salads as fresh as it gets . This is one of my new now favorites . Too bad there is n't one close to better work for me . I would probably be there two or three times a week easily .	0.987417	0.46623	['get_semantic_related1', 'addition', 'addition', 'get_semantic_related']	[['new', 'new now'], ['good', 'goodq'], ['heavenly', 'heavenlyx'], ['work', 'better work']]	4	2	0	2	0.876442	0.259259	0.203704	0	0.0408163	54	0.53377	0.0740741
864	I studied abroad in Spain so I was excited to try a tapas kitchen in town . Went with a decent sized group and ordered a g9ood selection off the menu ... Was n't let down by any of the food rations . It was all really g9ood . This will sound snobby and I ca n't do anything about it but , a lot of them were n't the traditional Spanish tapas or pintxos ( Basque Country ) we ate abroad , but still g…	0.942578	0.267029	['get_semantic_related1', 'bitsquatting', 'insertion']	[['food', 'food rations'], ['pretty', 'psetty'], ['good', 'g9ood']]	3	2	0	2	0.893597	0	0.0428571	0.00729927	0.0362319	150	0.732971	0.02
[truncated: 75 more rows]
